# Supplementary material
Source: Royal Society of Chemistry journal article supplement (doi:10.1039/d6ob00574h)
Supplement: d6ob00574h1.pdf [file d6ob00574h1.pdf]

## SUPPORTING INFORMATION

### **H $\beta$ zeolite mediated sustainable solvent free synthesis of indole-2-carboxylic esters**

Krishna Sai Gajula<sup>a\*</sup>, Sai Teja Avusali<sup>a</sup>, Pragati Rathore<sup>a</sup>, Imran Mohammad<sup>a</sup>, Khairunnisa Begam Mahammad<sup>a</sup>, Sreepriya Vedantam<sup>b,c</sup> and Narender Nama<sup>a,c\*</sup>

<sup>a</sup>Catalysis and Fine Chemicals Division, CSIR-Indian Institute of Chemical Technology, Hyderabad-500007, India.

<sup>b</sup>Chemical Engineering & Process Technology, CSIR-Indian Institute of Chemical Technology, Hyderabad-500007, India.

<sup>c</sup>Academy of Scientific and Innovative Research (AcSIR), Ghaziabad-201002, India.

\*Corresponding author E-mail address: [krishnasai.iict@csir.res.in](mailto:krishnasai.iict@csir.res.in); [narendern33@yahoo.co.in](mailto:narendern33@yahoo.co.in)  
Tel.: +91-40-27191703

### **Table of Contents**

|                                                                                |                |
|--------------------------------------------------------------------------------|----------------|
| <b>1. General Information.....</b>                                             | <b>S2</b>      |
| <b>2. Spectroscopic data .....</b>                                             | <b>S3-S14</b>  |
| <b>3. Copies of <sup>1</sup>H, <sup>13</sup>C NMR spectra of products.....</b> | <b>S15-S82</b> |
| <b>4. References.....</b>                                                      | <b>S83</b>     |

## 1. General Information

**1b-1l** and **1n** were synthesized using previous method<sup>1</sup>, remaining all the chemicals were procured from Sigma-Aldrich and used without any further purification. The zeolite  $\beta$  catalyst in ammonia form with a Si/Al ratio of 19 was purchased from Alfa-Aesar. All the samples were systematically characterized using various spectroscopic techniques. <sup>1</sup>H NMR spectra were acquired using Bruker VX NMR FT-300, 400 or 500 MHz spectrometers, while <sup>13</sup>C NMR spectra were obtained using Bruker VX NMR FT-101 and 125 MHz spectrometers in CDCl<sub>3</sub>. The chemical shifts ( $\delta$ ) were reported in *ppm* units downfield from TMS as an internal standard for <sup>1</sup>H NMR and CDCl<sub>3</sub> for <sup>13</sup>C NMR spectra. Coupling constants (J) were reported in hertz (Hz), and the following multiplicities were recorded: s (singlet), brs (broad singlet), d (doublet), dd (doublet of doublet), t (triplet), and m (multiplet). The Shimadzu GC-2014 gas chromatograph was used to perform the gas chromatography analysis. It is equipped with an FID detector and a capillary column (EB-5, 30 m in length, 0.25 mm in inner diameter and with a 0.25 mm film). TLC inspections were carried out on Silica Gel 60 F<sub>254</sub> plates. Column chromatography was performed using silica gel (100-200 mesh). The XRD patterns of the samples were obtained using a regular Regaku miniflux X-ray Diffractometer with Ni-filtered CuK $\alpha$  radiation at  $2\theta = 2^\circ$ - $80^\circ$ . The scanning rate was set at  $2^\circ \text{ min}^{-1}$ , and the beam voltage and current were 30 kV and 15 mA, respectively.

## 2. Spectroscopic data

### 2-(1-Phenylvinyl) aniline (1b)<sup>2</sup>

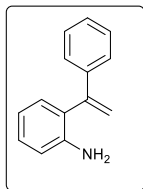

Yellow oil, 75% yield. <sup>1</sup>H NMR (400 MHz, CDCl<sub>3</sub>): δ (ppm) = 7.68-7.65 (m, 2H), 7.58-7.54 (m, 3H), 7.44-7.40 (m, 2H), 7.08-7.04 (m, 1H), 6.88 (d, *J* = 6.6 Hz, 1H), 6.06 (d, *J* = 1.6 Hz, 1H), 5.63 (d, *J* = 1.4 Hz, 1H), 3.73 (s, 2H). <sup>13</sup>C NMR (101 MHz, CDCl<sub>3</sub>): δ (ppm) = 147.48, 144.33, 139.97, 131.11, 129.10, 128.90, 128.40, 126.98, 118.53, 116.39, 115.87.

### 4-Methoxy-2-(1-phenylvinyl) aniline (1c)<sup>2</sup>

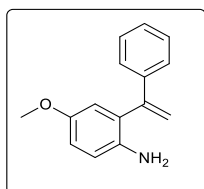

Yellow oil, 72% yield. <sup>1</sup>H NMR (400 MHz, CDCl<sub>3</sub>): δ (ppm) = 7.39-7.36 (m, 2H), 7.34-7.27 (m, 3H), 6.77 (dd, *J* = 8.6, 2.9 Hz, 1H), 6.72 (d, *J* = 2.9 Hz, 1H), 6.65 (d, *J* = 8.6 Hz, 1H), 5.80 (d, *J* = 1.4 Hz, 1H), 5.35 (d, *J* = 1.4 Hz, 1H), 3.75 (s, 3H). <sup>13</sup>C NMR (101 MHz, CDCl<sub>3</sub>): δ (ppm) = 152.56, 147.21, 139.48, 137.69, 128.65, 128.19, 126.68, 116.96, 116.17, 114.68, 55.80.

### 2,4-Dimethyl-6-(1-phenylvinyl)aniline (1f)

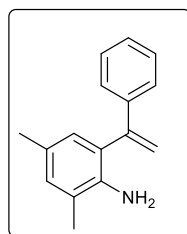

Yellow oil, 78% yield. <sup>1</sup>H NMR (500 MHz, CDCl<sub>3</sub>): δ (ppm) = 7.29-7.23 (m, 2H), 7.22-7.13 (m, 3H), 6.79 (s, 1H), 6.71 (s, 1H), 5.69 (d, *J* = 2.7 Hz, 1H), 5.22 (d, *J* = 2.9 Hz, 1H), 3.15 (s, 2H),

2.14 (s, 3H), 2.04 (s, 3H).  $^{13}\text{C}$  NMR (126 MHz,  $\text{CDCl}_3$ ):  $\delta$  (ppm) = 147.38, 139.71, 139.38, 130.49, 128.81, 128.36, 127.84, 127.03, 126.68, 126.49, 122.35, 115.72, 20.25, 17.53.

#### 4-Chloro-2-(1-phenylvinyl)aniline (**1g**)<sup>3</sup>

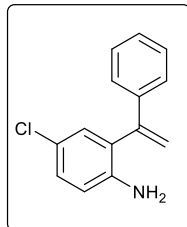

Yellow oil, 71% yield.  $^1\text{H}$  NMR (300 MHz,  $\text{CDCl}_3$ ):  $\delta$  (ppm) = 7.28-7.19 (m, 5H), 7.06-6.96 (m, 2H), 6.50 (t, 1H), 5.71 (d,  $J = 1.3$  Hz, 1H), 5.25 (d,  $J = 1.3$  Hz, 1H), 3.21 (br s, 2H).  $^{13}\text{C}$  NMR (101 MHz,  $\text{CDCl}_3$ ):  $\delta$  (ppm) = 146.07, 142.56, 138.86, 130.22, 128.65, 128.56, 128.49, 128.31, 126.52, 122.79, 116.74, 116.64.

#### Bromo-2-(1-phenylvinyl)aniline (**1h**)<sup>3</sup>

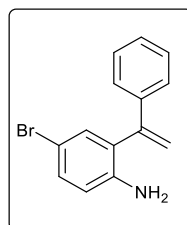

Yellow oil, 70% yield.  $^1\text{H}$  NMR (400 MHz,  $\text{CDCl}_3$ ):  $\delta$  (ppm) = 7.38-7.28 (m, 5H), 7.26-7.20 (m, 2H), 6.56 (d,  $J = 9.0$  Hz, 1H), 5.80 (s, 1H), 5.35 (s, 1H), 3.54 (br s, 2H).  $^{13}\text{C}$  NMR (101 MHz,  $\text{CDCl}_3$ ):  $\delta$  (ppm) = 147.00, 146.63, 139.61, 130.42, 129.02, 128.58, 128.13, 127.23, 126.55, 116.65, 116.27, 109.92.

#### Methyl 4-amino-3-(1-(cyclohexa-2,4-dien-1-yl)vinyl)benzoate (**1j**)<sup>3</sup>

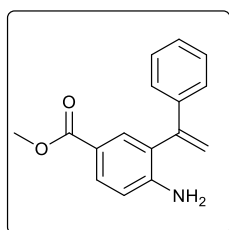

Yellow oil, 52% yield.  $^1\text{H}$  NMR (400 MHz,  $\text{CDCl}_3$ ):  $\delta(\text{ppm}) = 7.88\text{--}7.82$  (m, 2H), 7.39–7.29 (m, 5H), 6.66 (d,  $J = 8.9$  Hz, 1H), 5.84 (d,  $J = 1.1$  Hz, 1H), 5.39 (d,  $J = 1.2$  Hz, 1H), 3.98 (br s, 2H), 3.86 (br s, 3H).  $^{13}\text{C}$  NMR (126 MHz,  $\text{CDCl}_3$ ):  $\delta(\text{ppm}) = 162.52, 143.73, 141.47, 134.24, 128.04, 126.14, 123.97, 123.62, 121.82, 121.34, 114.79, 112.21, 109.73, 46.93$ .

### Ethyl 4-amino-3-(1-(cyclohexa-2,4-dien-1-yl)vinyl)benzoate (1k)<sup>3</sup>

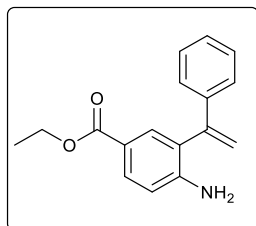

Yellow oil, 41% yield.  $^1\text{H}$  NMR (400 MHz,  $\text{CDCl}_3$ )  $\delta(\text{ppm}) = 7.89\text{--}7.83$  (m, 2H), 7.39–7.35 (m, 2H), 7.34–7.30 (m, 3H), 6.66 (d,  $J = 8.8$  Hz, 1H), 5.84 (d,  $J = 1.3$  Hz, 1H), 5.40 (d,  $J = 1.2$  Hz, 1H), 4.33 (q,  $J = 7.1$  Hz, 2H), 3.97 (br s, 2H), 1.37 (t,  $J = 7.1$  Hz, 3H).  $^{13}\text{C}$  NMR (101 MHz,  $\text{CDCl}_3$ )  $\delta(\text{ppm}) = 166.82, 148.39, 146.26, 138.96, 132.72, 130.86, 128.72, 128.36, 126.55, 126.09, 119.92, 116.94, 114.44, 60.41, 14.48$ .

### 3-(1-Phenylvinyl)naphthalen-2-amine (1n)<sup>3</sup>

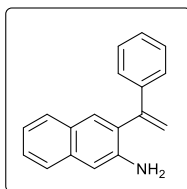

Yellow oil, 53% yield.  $^1\text{H}$  NMR (500 MHz,  $\text{CDCl}_3$ ):  $\delta(\text{ppm}) = 7.82\text{--}7.66$  (m, 2H), 7.43–7.38 (m, 2H), 7.37–7.31 (m, 2H), 7.29–7.22 (m, 4H), 7.19 (d,  $J = 8.4$  Hz, 1H), 5.90 (d,  $J = 1.5$  Hz, 1H), 5.40 (d,  $J = 1.5$  Hz, 1H), 3.98 (br s, 2H).  $^{13}\text{C}$  NMR (126 MHz,  $\text{CDCl}_3$ ):  $\delta(\text{ppm}) = 146.22, 138.77, 137.98, 132.78, 127.71, 127.45, 127.38, 127.01, 125.71, 124.69, 124.01, 122.51, 120.44, 120.04, 117.08, 115.55$ .

### Methyl 3-methyl-1H-indole-2-carboxylate (Table 1, 3a)<sup>4</sup>

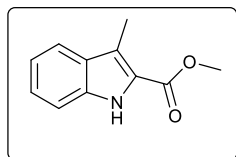

White solid, 98% yield.  $^1\text{H}$  NMR (500 MHz,  $\text{CDCl}_3$ ):  $\delta$  (ppm) = 8.83 (br s, 1H), 7.68 (dd,  $J$  = 8.1, 1.0 Hz, 1H), 7.41-7.30 (m, 2H), 7.20-7.11 (m, 1H), 3.97 (s, 3H), 2.63 (s, 3H).  $^{13}\text{C}$  NMR (126 MHz,  $\text{CDCl}_3$ ):  $\delta$  (ppm) = 162.19, 134.98, 127.43, 124.56, 122.16, 119.74, 119.26, 118.85, 110.65, 50.65, 8.89.

**Ethyl 3-methyl-1H-indole-2-carboxylate (Table 1, 3b)<sup>5</sup>**

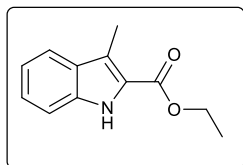

White solid, 93% yield.  $^1\text{H}$  NMR (400 MHz,  $\text{CDCl}_3$ ):  $\delta$  (ppm) = 8.64 (br s, 1H), 7.67 (d,  $J$  = 8.1 Hz, 1H), 7.38-7.30 (m, 2H), 7.16-7.12 (m, 1H), 4.42 (q,  $J$  = 7.1 Hz, 2H), 2.62 (s, 3H), 1.43 (t,  $J$  = 7.1 Hz, 3H).  $^{13}\text{C}$  NMR (126 MHz,  $\text{CDCl}_3$ ):  $\delta$  (ppm) = 162.62, 135.80, 128.60, 125.59, 120.79, 119.92, 111.59, 60.68, 14.49, 9.93.

***tert*-Butyl 3-methyl-1H-indole-2-carboxylate (Table 1, 3c)**

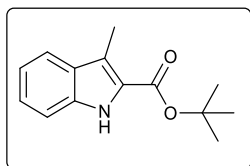

White solid, 67% yield.  $^1\text{H}$  NMR (400 MHz,  $\text{CDCl}_3$ ):  $\delta$  (ppm) = 8.60 (br s, 1H), 7.65 (d,  $J$  = 8.9 Hz, 1H), 7.37-7.28 (m, 2H), 7.15-7.10 (m, 1H), 2.58 (s, 3H), 1.63 (s, 9H).  $^{13}\text{C}$  NMR (101 MHz,  $\text{CDCl}_3$ ):  $\delta$  (ppm) = 162.03, 135.51, 128.69, 125.29, 124.69, 120.68, 119.77, 119.23, 111.51, 81.60, 28.47, 9.96. HRMS (ESI):  $m/z$  calcd for  $\text{C}_{14}\text{H}_{17}\text{NO}_2$  [ $\text{M}+\text{H}$ -*t*butyl] $^+$  176.0712 found 176.0716.

**Methyl 3-phenyl-1H-indole-2-carboxylate (Table 1, 3d)<sup>4</sup>**

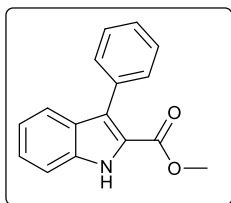

White solid, 92% yield.  $^1\text{H}$  NMR (500 MHz,  $\text{CDCl}_3$ ):  $\delta$  (ppm) = 9.15 (br s, 1H), 7.6 (dd,  $J$  = 8.2, 1.0 Hz, 1H), 7.57-7.54 (m, 2H), 7.47-7.42 (m, 3H), 7.40-7.33 (m, 2H), 7.16-7.13 (m, 1H), 3.81 (s, 3H).  $^{13}\text{C}$  NMR (101 MHz,  $\text{CDCl}_3$ ):  $\delta$  (ppm) = 162.54, 135.86, 133.47, 130.59, 127.92, 127.30, 125.93, 124.44, 122.44, 121.82, 120.95, 111.79, 51.85.

**Ethyl 3-phenyl-1H-indole-2-carboxylate (Table 1, 3e)<sup>4</sup>**

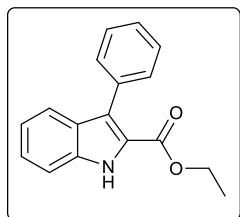

White solid, 87% yield.  $^1\text{H}$  NMR (500 MHz,  $\text{CDCl}_3$ ):  $\delta$  (ppm) = 9.12 (br s, 1H), 7.63 (dd,  $J$  = 8.2, 1.0 Hz, 1H), 7.57-7.54 (m, 2H), 7.46-7.43 (m, 3H), 7.39-7.33 (m, 2H), 7.16-7.13 (m, 1H), 4.29 (q,  $J$  = 7.2 Hz, 2H), 1.23 (t,  $J$  = 7.1 Hz, 3H).  $^{13}\text{C}$  NMR (101 MHz,  $\text{CDCl}_3$ ):  $\delta$  (ppm) = 162.07, 135.74, 133.54, 130.68, 127.97, 127.76, 127.22, 125.80, 124.27, 122.82, 121.78, 120.87, 111.72, 60.91, 14.07.

**Methyl 5-methoxy-3-phenyl-1H-indole-2-carboxylate (Table 1, 3f)<sup>4</sup>**

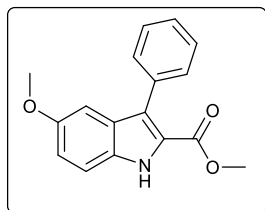

White solid, 99% yield.  $^1\text{H}$  NMR (400 MHz,  $\text{CDCl}_3$ ):  $\delta$  (ppm) = 9.10 (br s, 1H), 7.57 (d,  $J$  = 7.0 Hz, 2H), 7.53-7.45 (m, 2H), 7.40 (t,  $J$  = 7.3 Hz, 1H), 7.34 (d,  $J$  = 9.5 Hz, 1H), 7.08-7.00 (m, 2H), 3.82 (s, 3H), 3.80 (s, 3H).  $^{13}\text{C}$  NMR (101 MHz,  $\text{CDCl}_3$ ):  $\delta$  (ppm) = 162.25, 155.04, 133.63, 131.06, 130.45, 127.97, 127.20, 123.94, 122.93, 117.68, 112.67, 101.55, 55.76, 51.74.

**Ethyl 5-methoxy-3-phenyl-1H-indole-2-carboxylate (Table 1, 3g)<sup>6</sup>**

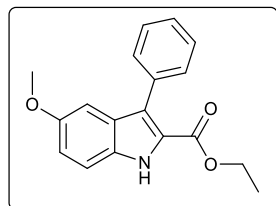

White solid, 97% yield.  $^1\text{H}$  NMR (400 MHz,  $\text{CDCl}_3$ ):  $\delta$  (ppm) = 8.90 (br s, 1H), 7.55 (d,  $J = 8.3$  Hz, 2H), 7.46 (t,  $J = 7.2$  Hz, 2H), 7.42-7.32 (m, 2H), 7.06-6.98 (m, 2H), 4.28 (q,  $J = 6.6$  Hz, 2H), 3.79 (s, 3H), 1.23 (t,  $J = 7.2$  Hz, 3H).  $^{13}\text{C}$  NMR (101 MHz,  $\text{CDCl}_3$ ):  $\delta$  (ppm) = 161.86, 155.00, 133.74, 131.00, 130.56, 127.84, 127.14, 117.54, 112.65, 101.54, 60.80, 55.76, 14.08.

**Methyl 7-methoxy-3-phenyl-1H-indole-2-carboxylate (Table 1, 3h)<sup>7</sup>**

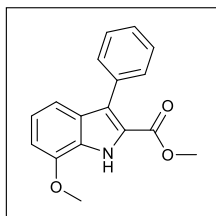

White solid, 58% yield.  $^1\text{H}$  NMR (400 MHz,  $\text{CDCl}_3$ ):  $\delta$  (ppm) = 9.15 (s, 1H), 7.61-7.51 (m, 2H), 7.50-7.42 (m, 2H), 7.41-7.33 (m, 1H), 7.22 (d,  $J = 8.2$  Hz, 1H), 7.06 (t,  $J = 7.9$  Hz, 1H), 6.76 (d,  $J = 7.5$  Hz, 1H), 4.00 (s, 3H), 3.82 (s, 3H).  $^{13}\text{C}$  NMR (126 MHz,  $\text{CDCl}_3$ ):  $\delta$ (ppm) = 162.17, 146.40, 133.56, 130.54, 129.03, 127.85, 127.22, 124.71, 122.13, 121.33, 113.94, 104.55, 55.52, 51.75.

**Ethyl 7-methoxy-3-phenyl-1H-indole-2-carboxylate (Table 1, 3i)<sup>8</sup>**

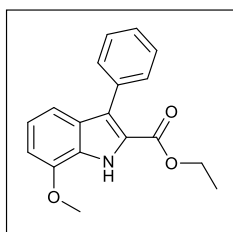

White solid, 78% yield.  $^1\text{H}$  NMR (300 MHz,  $\text{CDCl}_3$ ):  $\delta$  (ppm) = 9.18 (br s, 1H), 7.62-7.50 (m, 2H), 7.49-7.30 (m, 3H), 7.20 (s, 1H), 7.05 (t, 1H), 6.74 (d,  $J = 7.6$  Hz, 1H), 4.28 (q,  $J = 7.1$  Hz, 2H), 3.98 (s, 3H), 1.23 (t,  $J = 7.1$  Hz, 3H).  $^{13}\text{C}$  NMR (101 MHz,  $\text{CDCl}_3$ )  $\delta$ (ppm) = 161.80, 146.41, 133.69, 130.67, 129.11, 127.75, 127.17, 127.00, 124.54, 122.56, 121.28, 113.93, 104.49, 60.84, 55.51, 14.12.

**Methyl 5-methyl-3-phenyl-1H-indole-2-carboxylate (Table 1, 3j)<sup>7</sup>**

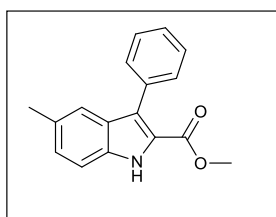

White solid, 70% yield.  $^1\text{H}$  NMR (400 MHz,  $\text{CDCl}_3$ ):  $\delta$  (ppm) = 8.95 (br s, 1H), 7.57-7.52 (m, 2H), 7.50-7.44 (m, 2H), 7.42-7.36 (m, 2H), 7.33 (d,  $J$  = 8.4 Hz, 1H), 7.19 (dd,  $J$  = 8.5, 1.5 Hz, 1H), 3.81 (s, 3H), 2.41 (s, 3H).  $^{13}\text{C}$  NMR (126 MHz,  $\text{CDCl}_3$ ):  $\delta$  (ppm) = 162.47, 134.19, 133.62, 130.57, 130.38, 128.13, 127.88, 127.19, 123.94, 122.47, 120.92, 111.41, 51.75, 21.48.

**Ethyl 5-methyl-3-phenyl-1H-indole-2-carboxylate (Table 1, 3k)<sup>6</sup>**

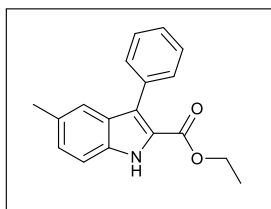

White solid, 73% yield.  $^1\text{H}$  NMR (400 MHz,  $\text{CDCl}_3$ ):  $\delta$  (ppm) = 8.96 (brs, 1H), 7.55 (dd,  $J$  = 8.2, 1.3 Hz, 2H), 7.49-7.41 (m, 2H), 7.41-7.30 (m, 3H), 7.18 (dd,  $J$  = 8.5, 1.4 Hz, 1H), 4.28 (q,  $J$  = 7.1 Hz, 2H), 2.40 (s, 3H), 1.22 (t,  $J$  = 7.1 Hz, 3H).  $^{13}\text{C}$  NMR (126 MHz,  $\text{CDCl}_3$ ):  $\delta$  (ppm) = 162.15, 134.19, 133.76, 130.69, 130.29, 128.17, 127.76, 127.13, 123.77, 122.88, 120.89, 111.44, 60.85, 21.50, 14.08.

**Methyl 5,7-dimethyl-3-phenyl-1H-indole-2-carboxylate (Table 1, 3l)**

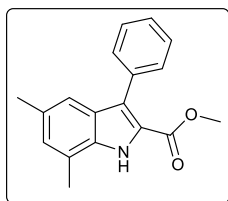

White solid, 96% yield.  $^1\text{H}$  NMR (400 MHz,  $\text{CDCl}_3$ ):  $\delta$  (ppm) = 8.80 (br s, 1H), 7.54 (dd,  $J$  = 8.5, 1.5 Hz, 2H), 7.46 (td,  $J$  = 6.9, 1.8 Hz, 2H), 7.42-7.33 (m, 1H), 7.24 (s, 1H), 7.01 (s, 1H), 3.81 (s, 3H), 2.52 (s, 3H), 2.38 (s, 3H).  $^{13}\text{C}$  NMR (101 MHz,  $\text{CDCl}_3$ )  $\delta$  (ppm) = 162.60, 133.99, 133.82, 130.70, 130.55, 128.20, 127.85, 127.77, 127.15, 124.40, 122.27, 120.71, 118.49, 51.75, 21.43, 16.55. HRMS (ESI):  $m/z$  calcd for  $\text{C}_{18}\text{H}_{17}\text{NO}_2$  [ $\text{M}+\text{H}$ ]<sup>+</sup> 280.1337 found 280.1340.

**Ethyl 5,7-dimethyl-3-phenyl-1H-indole-2-carboxylate (Table 1, 3m)**

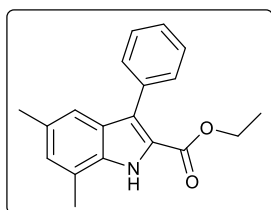

White solid, 97% yield.  $^1\text{H}$  NMR (400 MHz,  $\text{CDCl}_3$ ):  $\delta$  (ppm) = 8.82 (br s, 1H), 7.53 (dd,  $J$  = 8.5, 1.4 Hz, 2H), 7.48- 7.41 (m, 2H), 7.40-7.33 (m, 1H), 7.23 (s, 1H), 7.00 (s, 1H), 4.28 (q,  $J$  = 7.2 Hz, 2H), 2.52 (s, 3H), 2.37 (s, 3H), 1.21 (t,  $J$  = 7.2 Hz, 3H).  $^{13}\text{C}$  NMR (101 MHz,  $\text{CDCl}_3$ ):  $\delta$  (ppm) = 162.29, 133.95, 130.67, 128.09, 127.83, 127.70, 127.08, 124.21, 122.70, 120.70, 118.47, 60.83, 21.43, 16.58, 14.06. HRMS (ESI):  $m/z$  calcd for  $\text{C}_{19}\text{H}_{19}\text{NO}_2$   $[\text{M}+\text{H}]^+$  294.1494 found 294.1499.

### Methyl 5-chloro-3-phenyl-1H-indole-2-carboxylate (Table 1, 3n)<sup>7</sup>

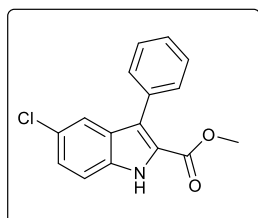

Brown solid, 85% yield.  $^1\text{H}$  NMR (400 MHz,  $\text{CDCl}_3$ ):  $\delta$  (ppm) = 9.08 (br s, 1H), 7.59 (d,  $J$  = 2.0 Hz, 1H), 7.54-7.43 (m, 4H), 7.43-7.34 (m, 2H), 7.31 (dd,  $J$  = 8.8, 1.9 Hz, 1H), 3.82 (s, 3H).  $^{13}\text{C}$  NMR (101 MHz,  $\text{CDCl}_3$ ):  $\delta$  (ppm) = 162.15, 133.99, 132.75, 130.42, 128.89, 128.06, 127.57, 126.77, 126.46, 123.83, 123.58, 121.04, 112.90, 51.98.

### Ethyl 5-chloro-3-phenyl-1H-indole-2-carboxylate (Table 1, 3o)

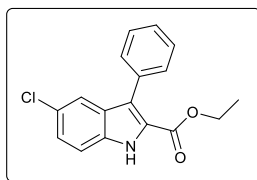

Brown solid, 81% yield.  $^1\text{H}$  NMR (400 MHz,  $\text{CDCl}_3$ ):  $\delta$  (ppm) = 9.20 (br s, 1H), 7.60 (d,  $J$  = 2.1 Hz, 1H), 7.54-7.50 (m, 2H), 7.49-7.43 (m, 2H), 7.42-7.35 (m, 2H), 7.30 (dd,  $J$  = 8.7, 2.0 Hz, 1H), 4.30 (q,  $J$  = 7.1 Hz, 2H), 1.23 (t,  $J$  = 7.2 Hz, 3H).  $^{13}\text{C}$  NMR (101 MHz,  $\text{CDCl}_3$ ):  $\delta$  (ppm) = 161.76, 133.92, 132.83, 130.50, 128.89, 127.88, 127.46, 126.65, 126.28, 123.95, 123.63, 120.96, 112.86, 61.11, 13.99. HRMS (ESI):  $m/z$  calcd for  $\text{C}_{17}\text{H}_{14}\text{ClNO}_2$   $[\text{M}+\text{H}]^+$  300.0791 found 300.0798.

**Methyl 5-bromo-3-phenyl-1H-indole-2-carboxylate (Table 1, 3p)<sup>4</sup>**

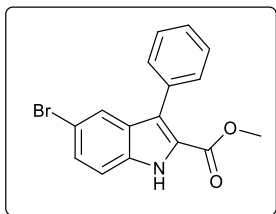

Brown solid, 90% yield. <sup>1</sup>H NMR (500 MHz, CDCl<sub>3</sub>): δ (ppm) = 9.20 (br s, 1H), 7.74 (d, *J* = 1.8 Hz, 1H), 7.53-7.38 (m, 6H), 7.32 (d, *J* = 8.9 Hz, 1H), 3.81 (s, 3H). <sup>13</sup>C NMR (101 MHz, CDCl<sub>3</sub>): δ (ppm) = 162.22, 134.32, 132.76, 130.44, 129.50, 128.89, 128.06, 127.57, 124.16, 123.68, 123.41, 114.21, 113.36, 52.00.

**Ethyl 5-bromo-3-phenyl-1H-indole-2-carboxylate (Table 1, 3q)<sup>6</sup>**

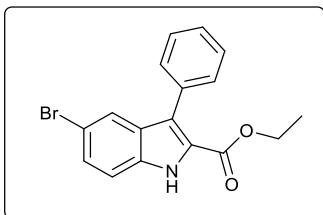

White solid, 81% yield. <sup>1</sup>H NMR (400 MHz, CDCl<sub>3</sub>): δ (ppm) = 9.20 (br s, 1H), 7.74 (s, 1H), 7.51 (dd, *J* = 8.5, 1.4 Hz, 2H), 7.48-7.36 (m, 4H), 7.32 (d, *J* = 8.7 Hz, 1H), 4.29 (q, *J* = 7.2 Hz, 2H), 1.22 (t, *J* = 7.1 Hz, 3H). <sup>13</sup>C NMR (101 MHz, CDCl<sub>3</sub>): δ (ppm) = 161.78, 134.21, 132.83, 130.55, 129.58, 128.80, 127.93, 127.52, 124.16, 123.82, 123.55, 114.16, 113.28, 61.17, 14.03.

**Methyl 5-fluoro-3-phenyl-1H-indole-2-carboxylate (Table 1, 3r)<sup>7</sup>**

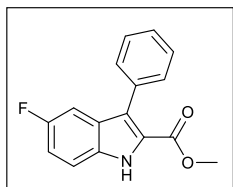

White solid, 62% yield. <sup>1</sup>H NMR (500 MHz, CDCl<sub>3</sub>): δ (ppm) = 9.00 (br s, 1H), 7.57-7.50 (m, 2H), 7.50-7.43 (m, 2H), 7.43-7.35 (m, 2H), 7.28 (d, *J* = 2.5 Hz, 1H), 7.13 (td, *J* = 9.0, 2.5 Hz, 1H), 3.82 (s, 3H). <sup>13</sup>C NMR (75 MHz, CDCl<sub>3</sub>): δ (ppm) = 162.15, 132.99, 132.29, 130.36, 128.02, 127.47, 123.91, 115.29, 114.93, 112.78, 112.66, 106.26, 105.94, 51.93.

### Dimethyl 3-phenyl-1H-indole-2,5-dicarboxylate (Table 1, 3s)

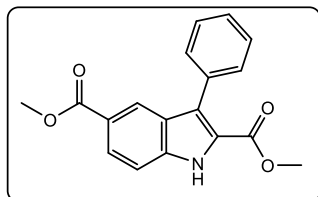

White solid, 50% yield.  $^1\text{H}$  NMR (400 MHz,  $\text{CDCl}_3$ ):  $\delta(\text{ppm}) = 9.14$  (br s, 1H), 8.40-8.36 (m, 1H), 8.06 (dd,  $J = 8.7, 1.6$  Hz, 1H), 7.57-7.41 (m, 6H), 3.90 (s, 3H), 3.83 (s, 3H).  $^{13}\text{C}$  NMR (126 MHz,  $\text{CDCl}_3$ ):  $\delta(\text{ppm}) = 167.48, 161.94, 137.88, 132.50, 130.46, 128.02, 127.61, 126.82, 125.62, 125.05, 123.65, 123.20, 111.45, 51.93$ . HRMS (ESI):  $m/z$  calcd for  $\text{C}_{18}\text{H}_{15}\text{NO}_4$   $[\text{M}+\text{H}]^+$  310.1079 found 310.1064.

### 2-Ethyl 5-methyl 3-phenyl-1H-indole-2,5-dicarboxylate (Table 1, 3t)

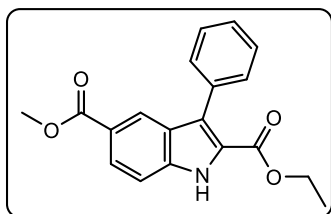

White solid, 83% yield.  $^1\text{H}$  NMR (400 MHz,  $\text{CDCl}_3$ ):  $\delta(\text{ppm}) = 9.20$  (br s, 1H), 8.35-8.29 (m, 1H), 7.99 (dd,  $J = 8.8, 1.6$  Hz, 1H), 7.49 (dt,  $J = 8.3, 1.5$  Hz, 2H), 7.45-7.33 (m, 4H), 4.24 (q,  $J = 7.2$  Hz, 2H), 3.84 (s, 3H), 1.17 (t,  $J = 7.2$  Hz, 3H).  $^{13}\text{C}$  NMR (126 MHz,  $\text{CDCl}_3$ ):  $\delta(\text{ppm}) = 167.52, 161.59, 137.86, 132.63, 130.56, 127.88, 127.55, 126.71, 125.46, 125.02, 124.06, 123.13, 111.45, 61.12, 51.92, 13.96$ . HRMS (ESI):  $m/z$  calcd for  $\text{C}_{19}\text{H}_{17}\text{NO}_4$   $[\text{M}+\text{H}]^+$  324.1235 found 324.1233.

### 5-Ethyl 2-methyl 3-phenyl-1H-indole-2,5-dicarboxylate (Table 1, 3u)

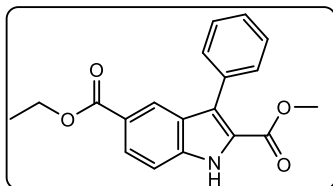

White solid, 60% yield.  $^1\text{H}$  NMR (400 MHz,  $\text{CDCl}_3$ ):  $\delta(\text{ppm}) = 9.11$  (br s, 1H), 8.40-8.35 (m, 1H), 8.06 (dd,  $J = 8.9, 1.6$  Hz, 1H), 7.58-7.53 (m, 2H), 7.53-7.40 (m, 4H), 4.37 (q,  $J = 7.2$  Hz, 2H), 3.83 (s, 3H), 1.38 (t,  $J = 7.1$  Hz, 3H).  $^{13}\text{C}$  NMR (75 MHz,  $\text{CDCl}_3$ ):  $\delta(\text{ppm}) = 167.10, 162.05, 137.94, 132.61, 130.54, 128.08, 127.66, 126.87, 125.05, 123.64, 111.4, 60.84, 52.01, 14.44$ . HRMS (ESI):  $m/z$  calcd for  $\text{C}_{19}\text{H}_{17}\text{NO}_4$   $[\text{M}+\text{H}]^+$  324.1235 found 324.1234.

### Diethyl 3-phenyl-1H-indole-2,5-dicarboxylate (Table 1, 3v)

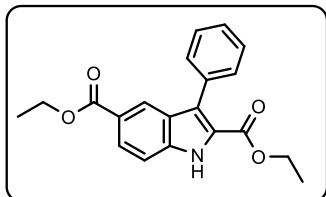

White solid, 62% yield.  $^1\text{H}$  NMR (400 MHz,  $\text{CDCl}_3$ )  $\delta(\text{ppm}) = 9.15$  (br s, 1H), 8.41-8.36 (m, 1H), 8.06 (dd,  $J = 8.8, 1.7$  Hz, 1H), 7.56 (dd,  $J = 8.2, 1.5$  Hz, 2H), 7.51-7.39 (m, 4H), 4.37 (q,  $J = 7.1$  Hz, 2H), 4.30 (q,  $J = 7.2$  Hz, 2H), 1.38 (t,  $J = 7.1$  Hz, 3H), 1.24 (t,  $J = 7.2$  Hz, 3H).  $^{13}\text{C}$  NMR (101 MHz,  $\text{CDCl}_3$ )  $\delta(\text{ppm}) = 167.13, 161.66, 137.89, 132.72, 130.65, 127.94, 127.60, 126.77, 125.53, 125.01, 124.09, 123.57, 111.43, 61.17, 60.83, 14.44, 14.04$ . HRMS (ESI):  $m/z$  calcd for  $\text{C}_{20}\text{H}_{19}\text{NO}_4$   $[\text{M}+\text{H}]^+$  338.1392 found 338.1404.

### Methyl 1H-indole-2-carboxylate (Table 1, 3y)<sup>9</sup>

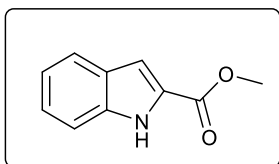

White solid, 96% yield.  $^1\text{H}$  NMR (400 MHz,  $\text{CDCl}_3$ ):  $\delta$  (ppm) = 9.07 (br s, 1H), 7.69 (dd,  $J = 8.2, 1.0$  Hz, 1H), 7.42 (dd,  $J = 8.4, 0.9$  Hz, 1H), 7.32 (ddd,  $J = 8.2, 6.9, 1.1$  Hz, 1H), 7.24-7.21 (m, 1H), 7.19-7.12 (m, 1H), 3.95 (s, 3H).  $^{13}\text{C}$  NMR (126 MHz,  $\text{CDCl}_3$ ):  $\delta$  (ppm) = 162.51, 136.88, 127.45, 127.08, 125.41, 122.61, 120.81, 111.88, 108.79, 52.01.

### Ethyl 1H-indole-2-carboxylate (Table 1, 3z)<sup>10</sup>

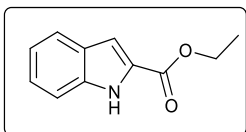

White solid, 88% yield.  $^1\text{H}$  NMR (500 MHz,  $\text{CDCl}_3$ ):  $\delta$  (ppm) = 9.15 (s, 1H), 7.69 (d,  $J = 8.1$  Hz, 1H), 7.42 (d,  $J = 8.2$  Hz, 1H), 7.35-7.28 (m, 1H), 7.23 (s, 1H), 7.17-7.09 (m, 1H), 4.42 (qd,  $J =$

7.2, 1.9 Hz, 2H), 1.42 (td,  $J = 7.2, 1.1$  Hz, 3H).  $^{13}\text{C}$  NMR (101 MHz,  $\text{CDCl}_3$ ):  $\delta$  (ppm) = 162.09, 136.83, 127.47, 125.30, 122.57, 120.74, 111.85, 108.62, 61.02, 14.38.

**Methyl 3-phenyl-1H-benzo[f]indole-2-carboxylate (Table 1, 3za)**

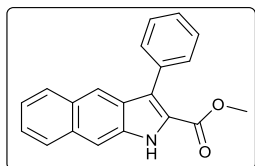

White solid, 54% yield.  $^1\text{H}$  NMR (500 MHz,  $\text{CDCl}_3$ ):  $\delta$  (ppm) = 9.97 (br s, 1H), 8.21 (d,  $J = 8.1$  Hz, 1H), 7.91 (d,  $J = 7.9$  Hz, 1H), 7.64-7.55 (m, 4H), 7.55-7.45 (m, 4H), 7.44-7.37 (m, 1H), 3.85 (s, 3H).  $^{13}\text{C}$  NMR (101 MHz,  $\text{CDCl}_3$ ):  $\delta$  (PPM) = 162.57, 133.52, 132.30, 131.82, 130.66, 128.92, 127.93, 127.34, 126.09, 125.92, 124.01, 122.24, 121.56, 121.04, 120.59, 120.26, 51.85. HRMS (ESI):  $m/z$  calcd for  $\text{C}_{20}\text{H}_{15}\text{NO}_2$   $[\text{M}+\text{H}]^+$  302.1181 found 302.1186.

**Ethyl 3-phenyl-1H-benzo[f]indole-2-carboxylate (Table 1, 3zb)**

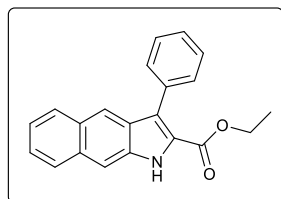

White solid, 97% yield.  $^1\text{H}$  NMR (300 MHz,  $\text{CDCl}_3$ ):  $\delta$  (ppm) = 9.77 (br s, 1H), 8.18 (dd,  $J = 7.9, 0.8$  Hz, 1H), 7.96-7.89 (m, 1H), 7.67-7.55 (m, 4H), 7.55-7.36 (m, 5H), 4.33 (q,  $J = 7.1$  Hz, 2H), 1.26 (t,  $J = 7.1$  Hz, 3H).  $^{13}\text{C}$  NMR (75 MHz,  $\text{CDCl}_3$ ):  $\delta$  (ppm) = 162.31, 133.69, 132.27, 131.80, 130.79, 128.90, 127.78, 127.27, 126.01, 125.83, 124.05, 122.16, 121.64, 121.50, 120.70, 120.28, 60.97, 14.12. HRMS (ESI):  $m/z$  calcd for  $\text{C}_{21}\text{H}_{17}\text{NO}_2$   $[\text{M}+\text{H}]^+$  316.1337 found 316.1345.

### 3. Copies of $^1\text{H}$ and $^{13}\text{C}$ NMR spectra of compounds:

#### 2-(1-Phenylvinyl)aniline (1b)

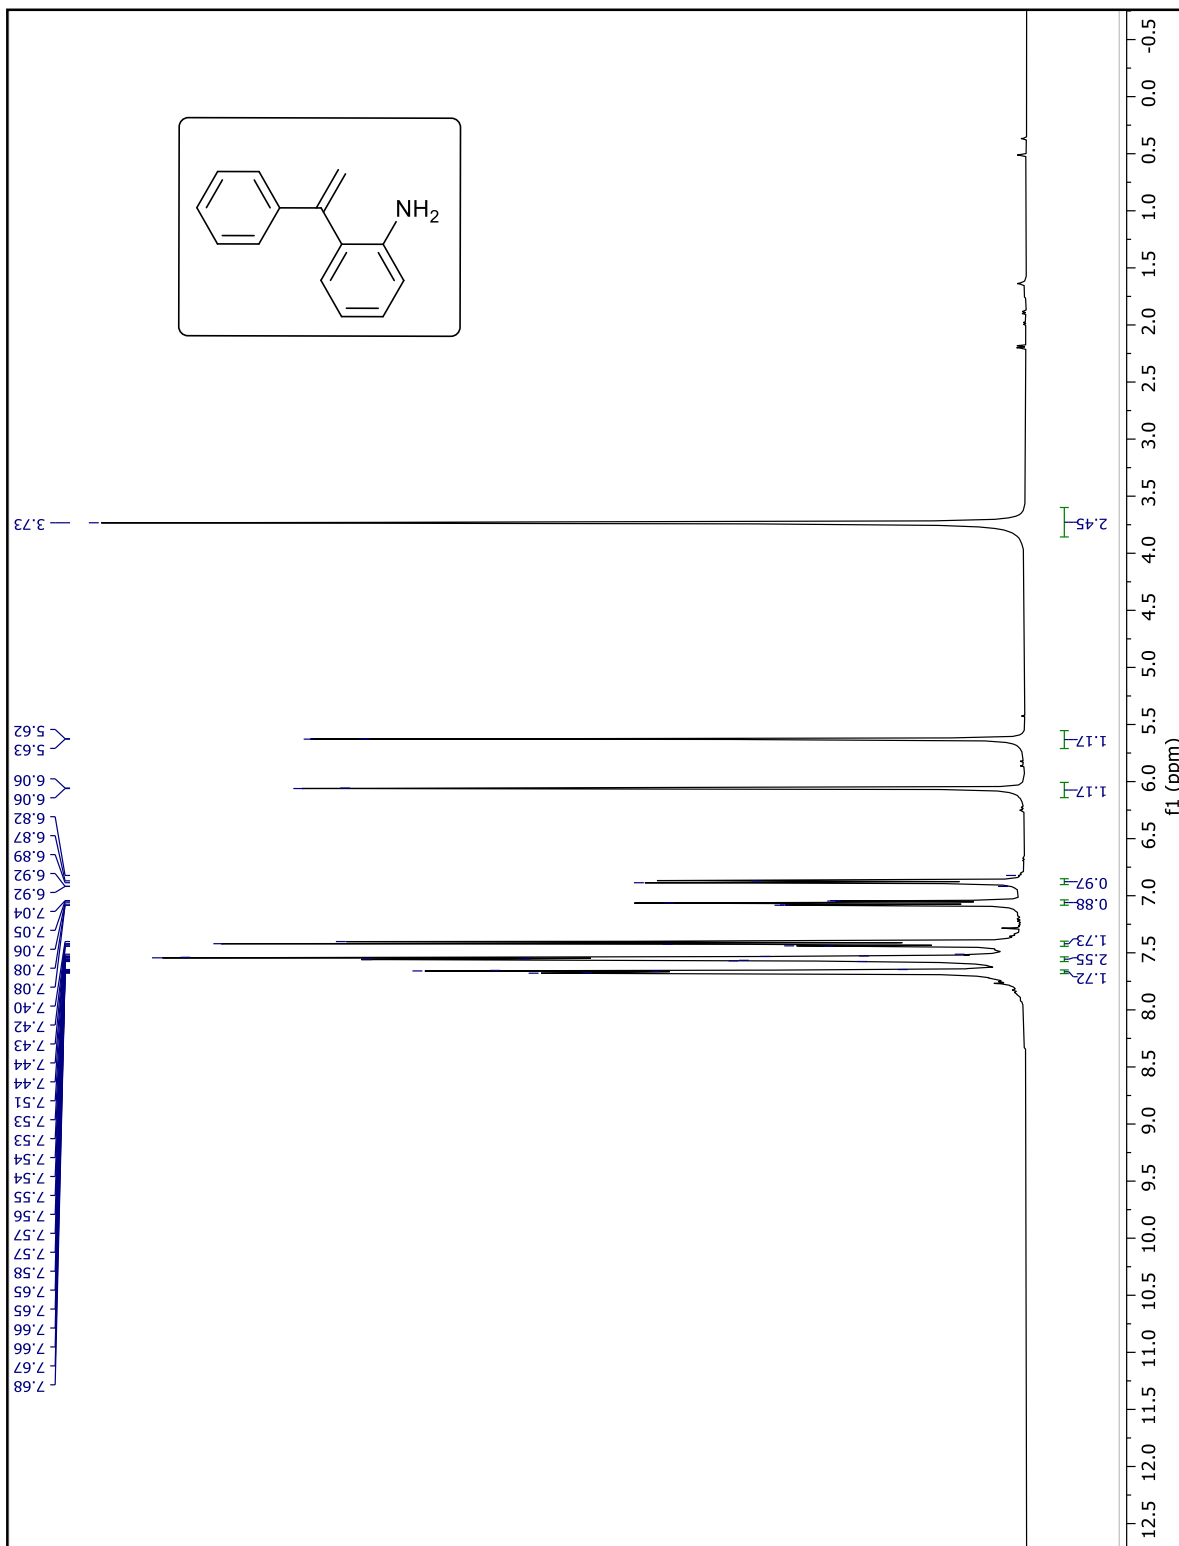

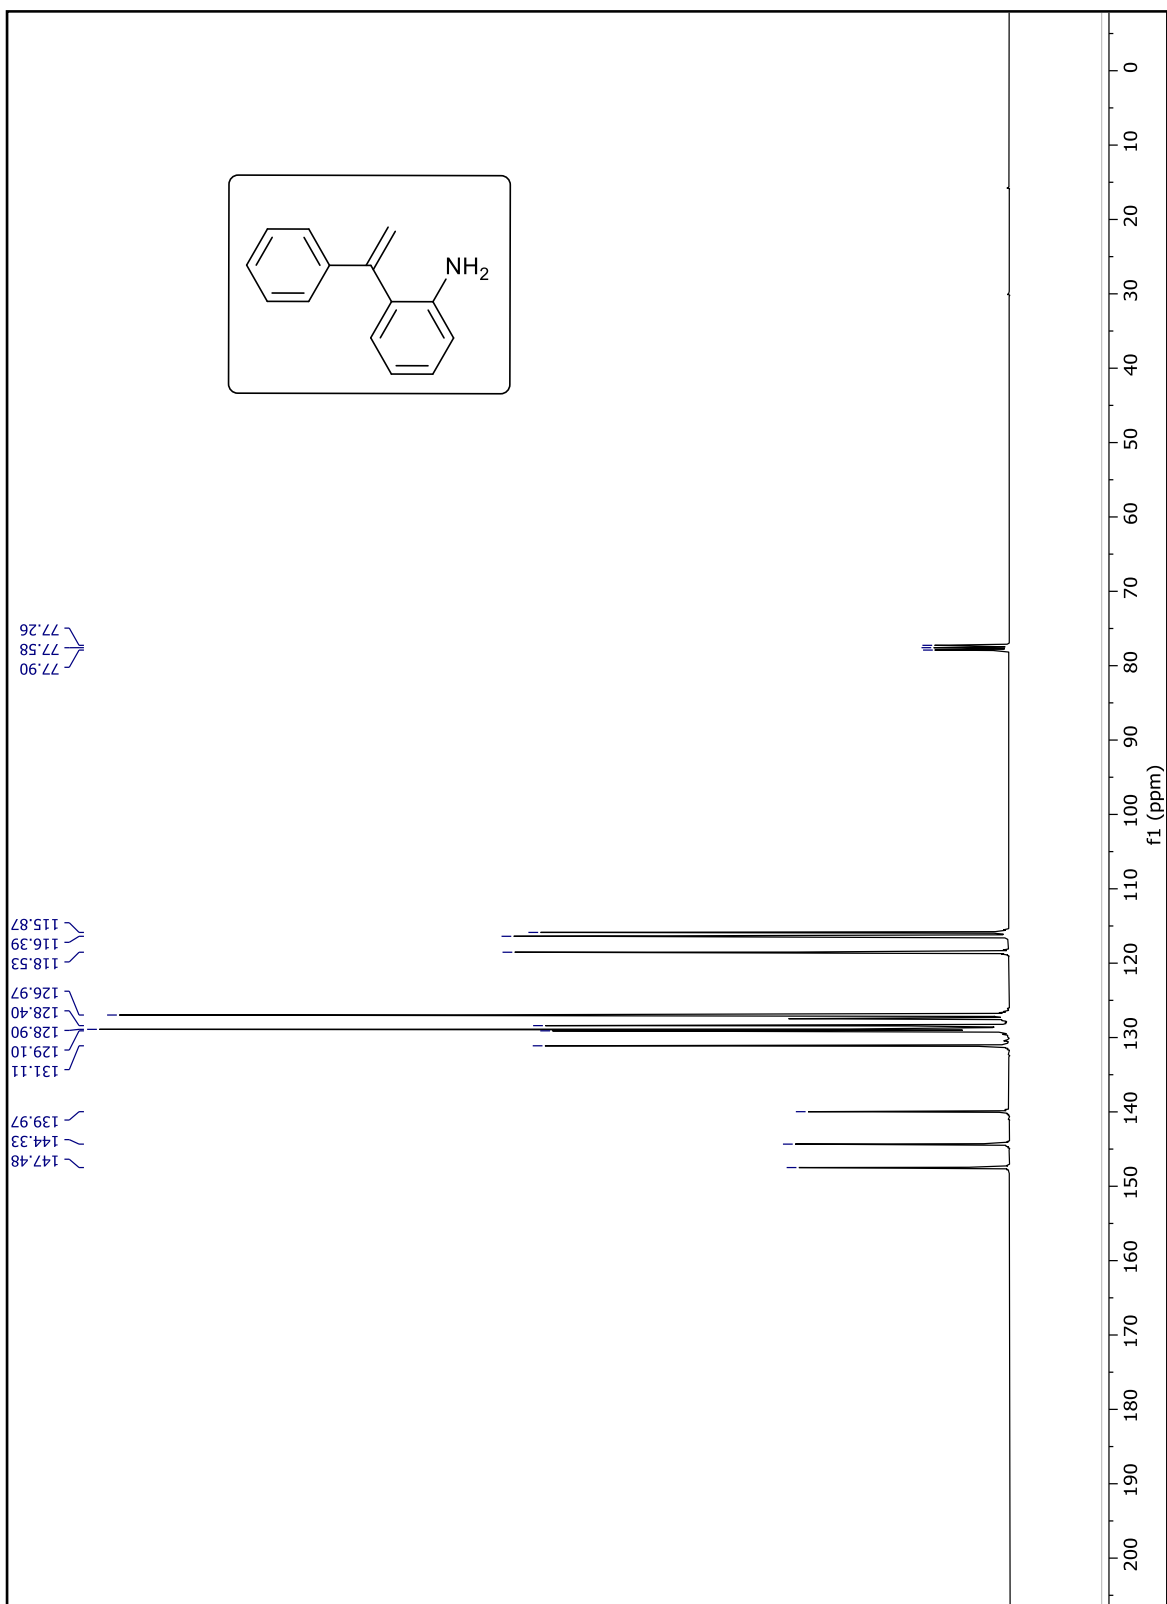

# 4-Methoxy-2-(1-phenylvinyl)aniline (1c)

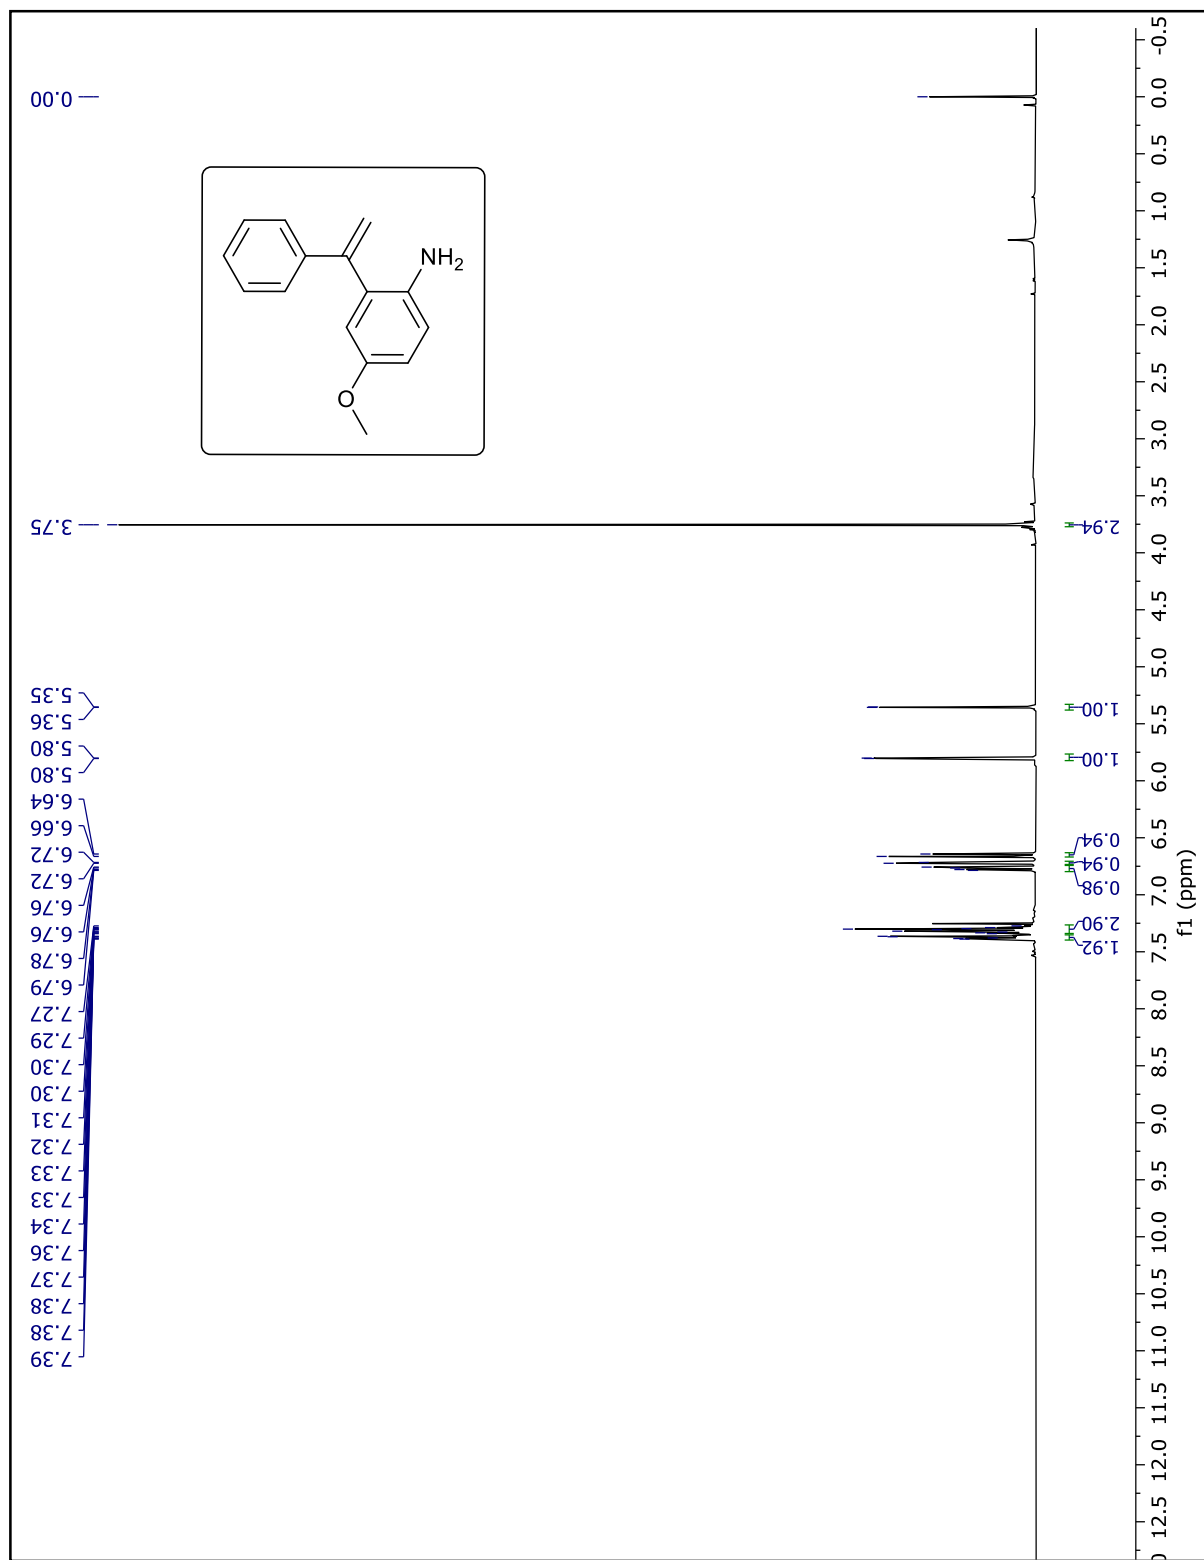

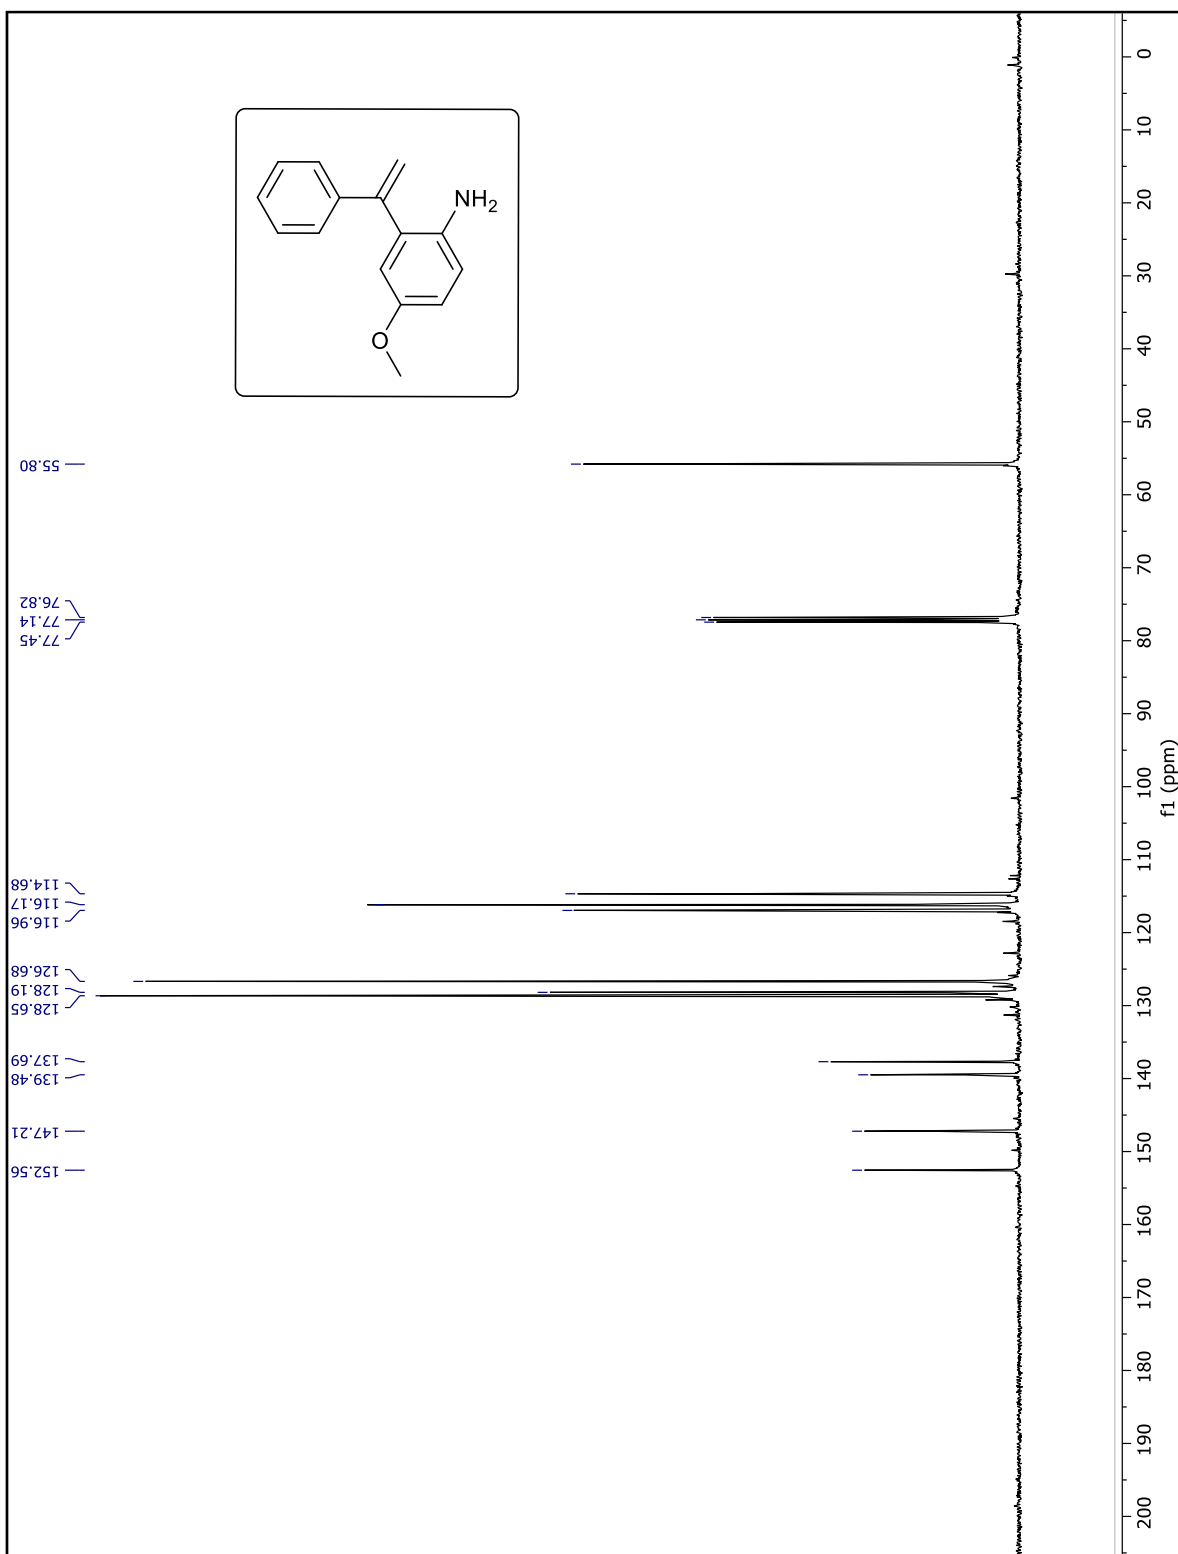

# 2,4-Dimethyl-6-(1-phenylvinyl)aniline (1f)

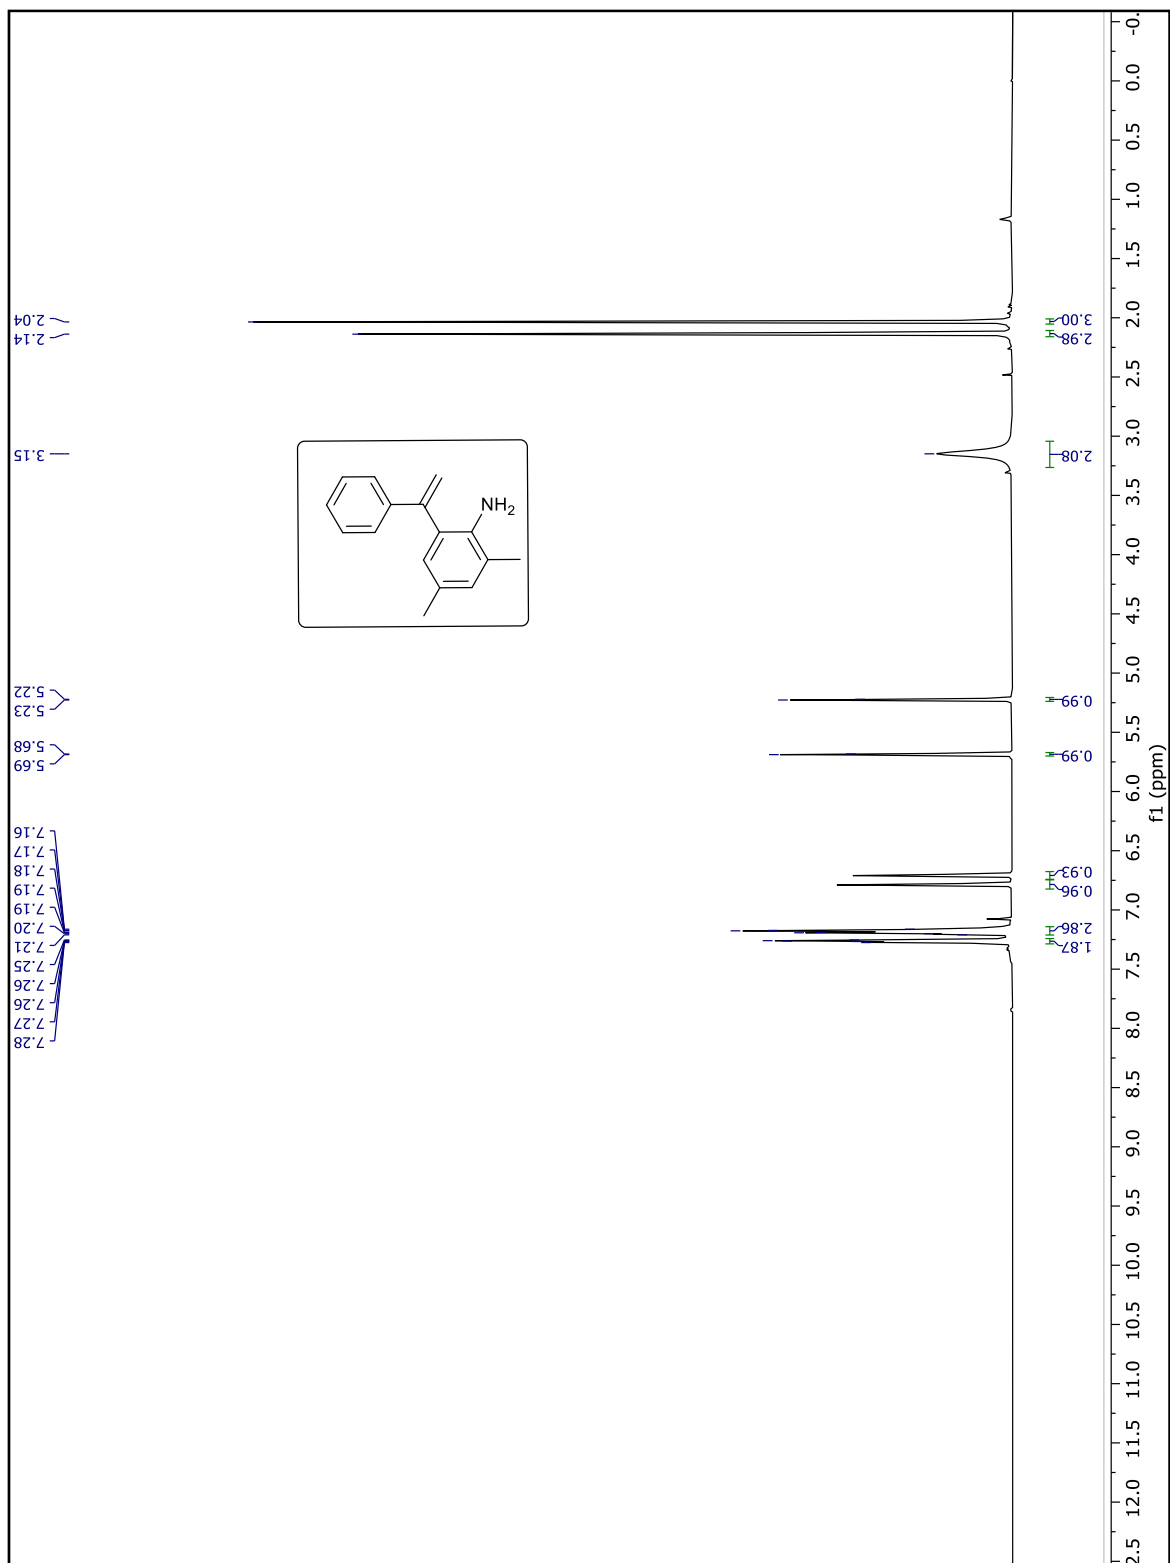

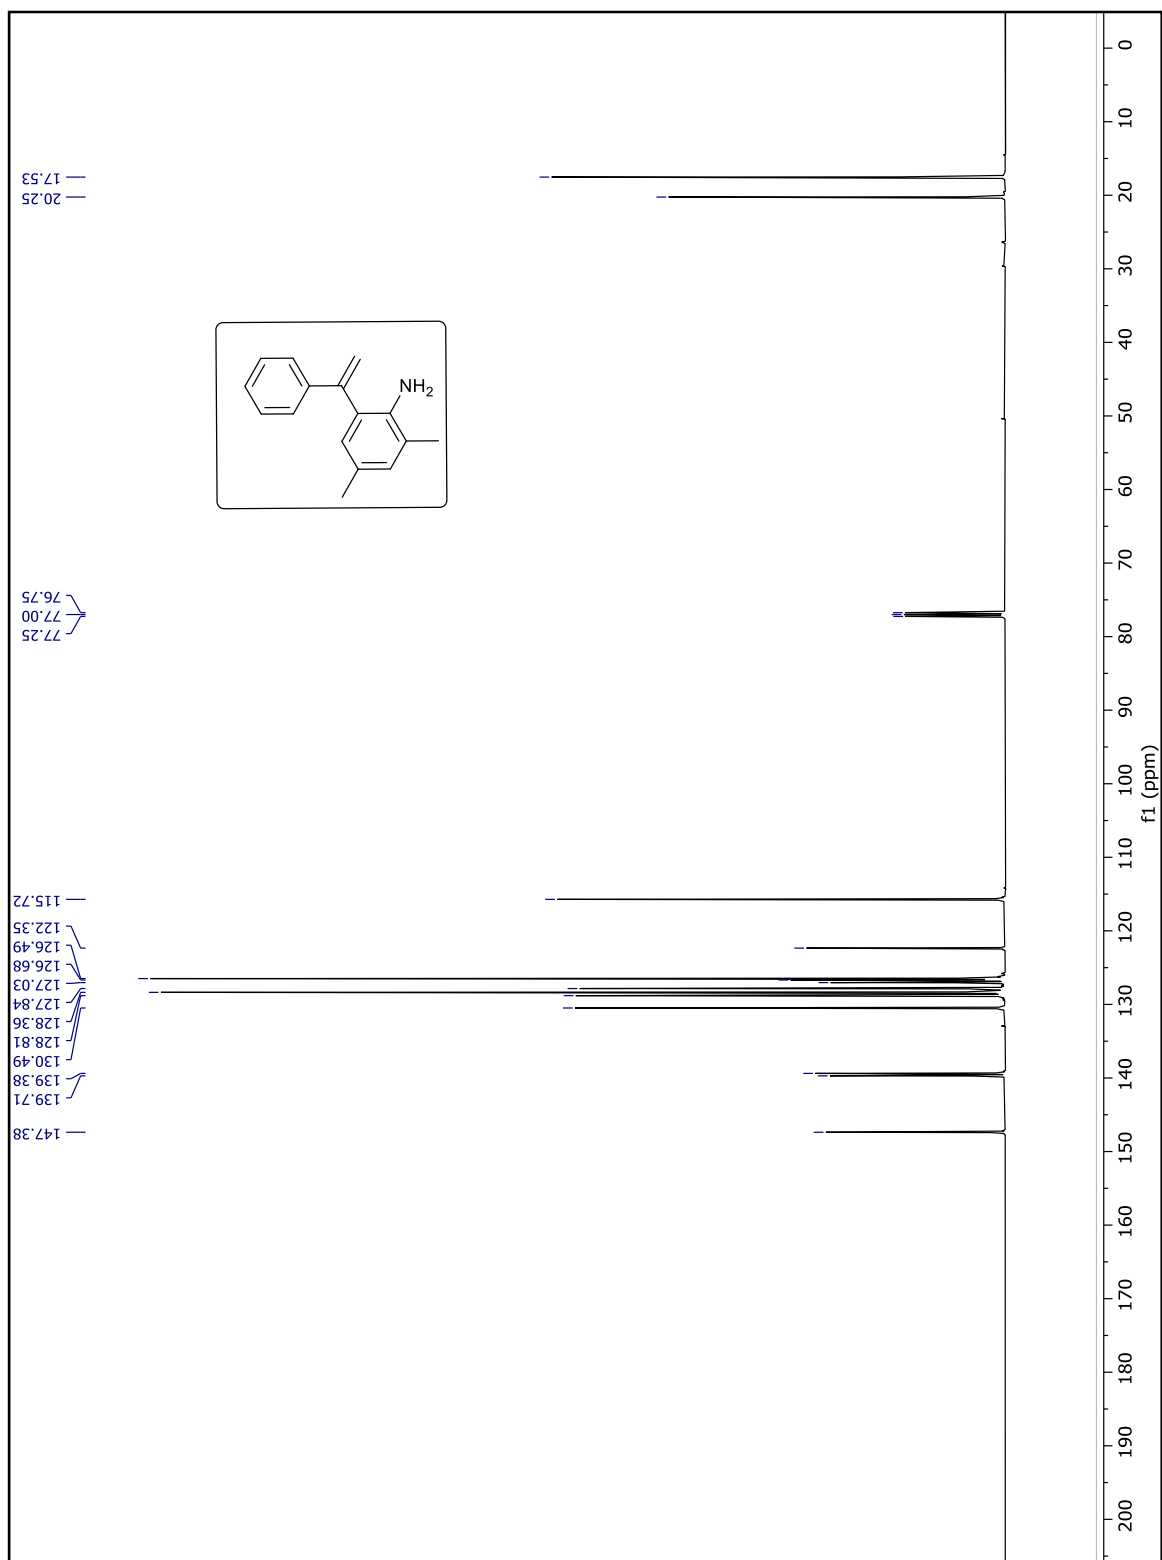

# 4-Chloro-2-(1-phenylvinyl)aniline (1g)

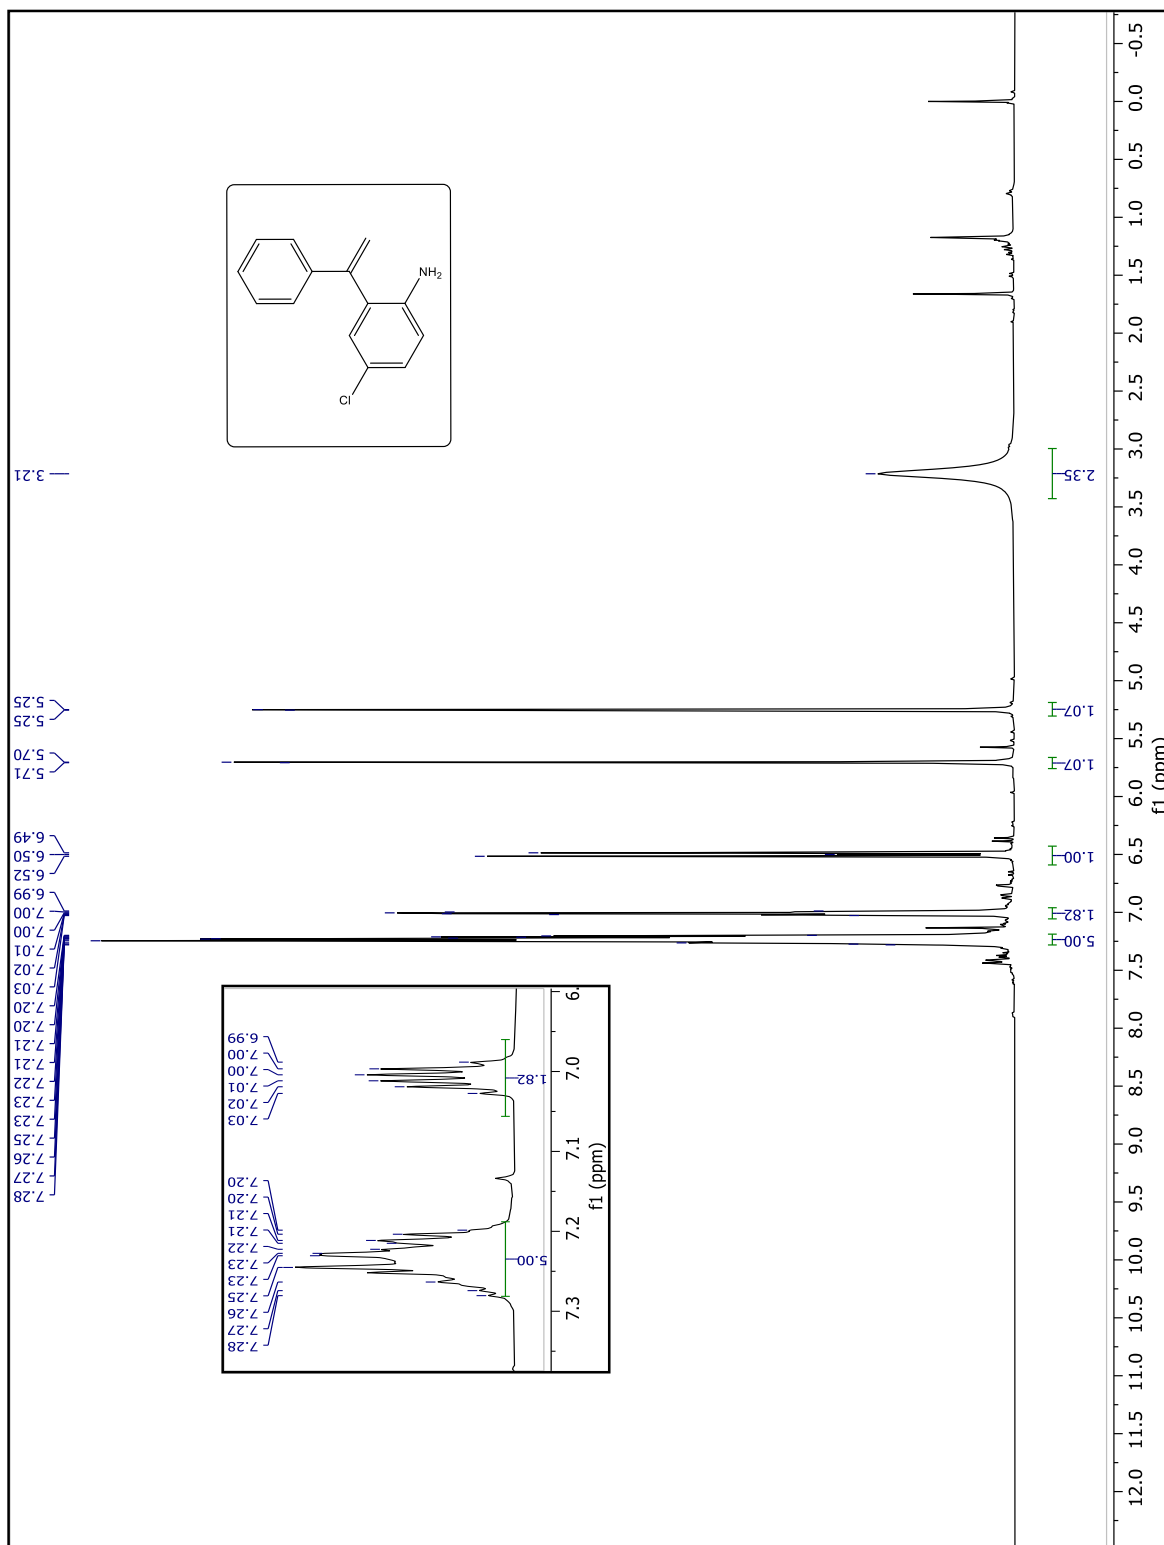

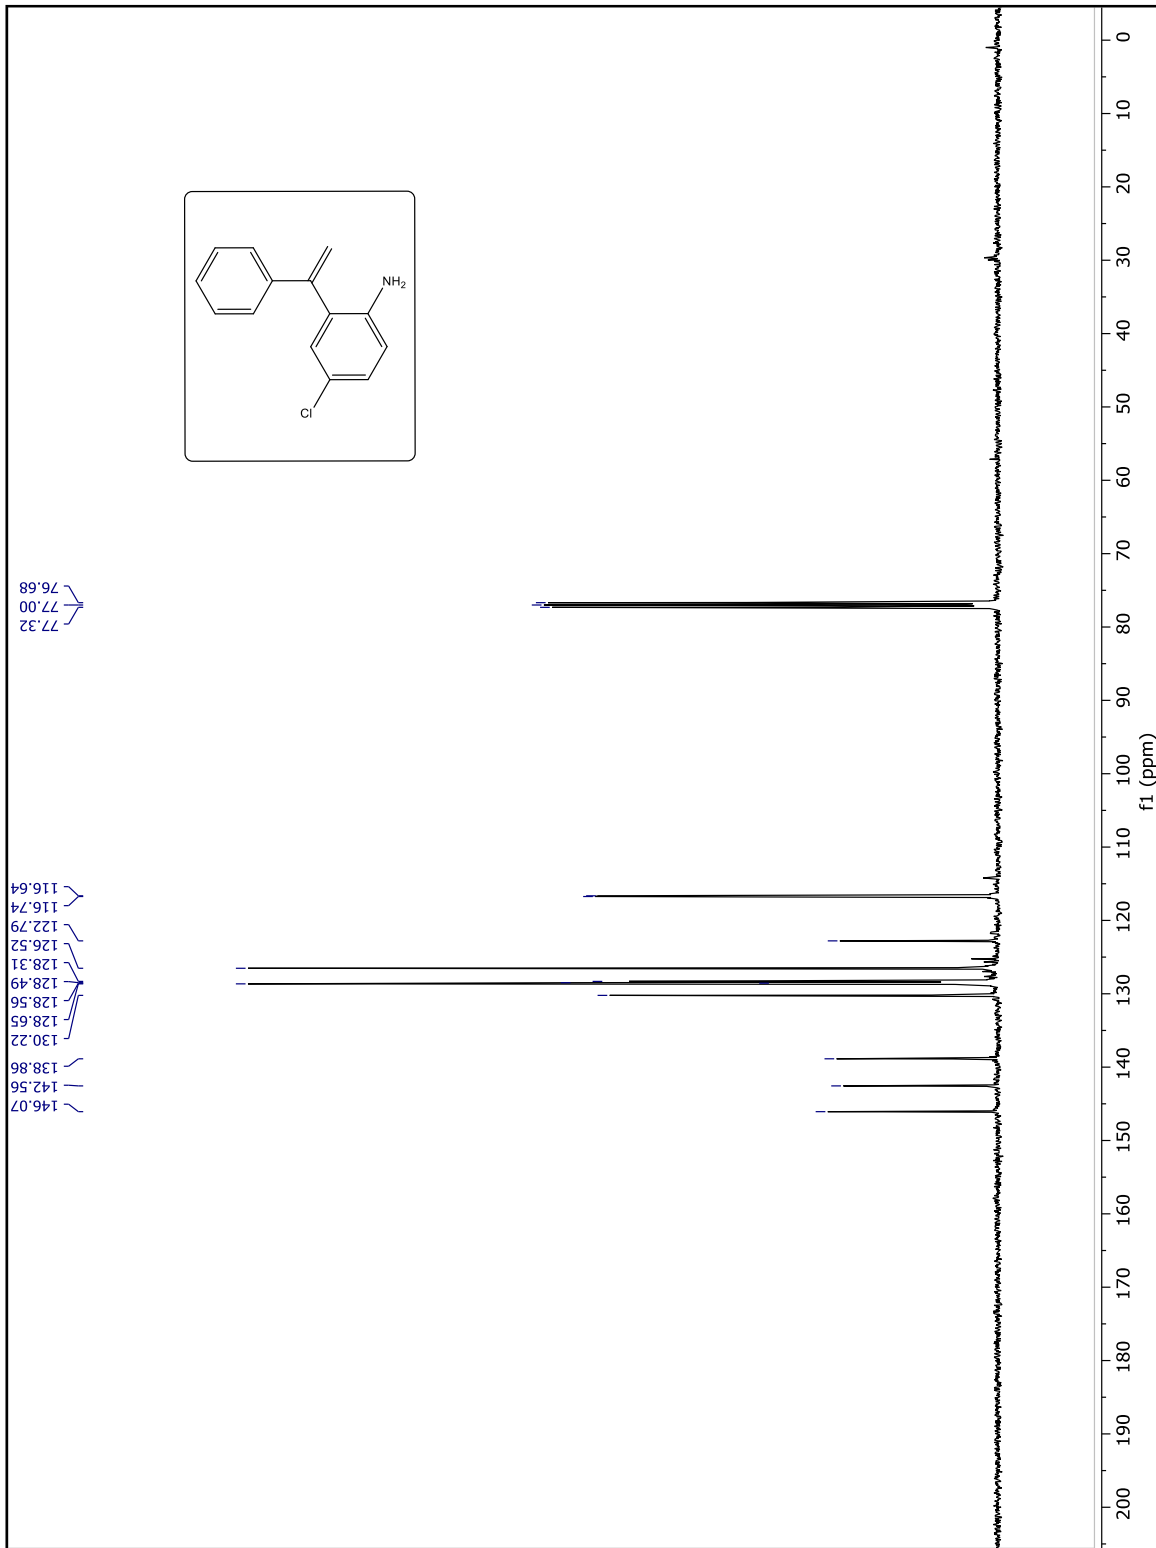

# 4-Bromo-2-(1-phenylvinyl)aniline (1h)

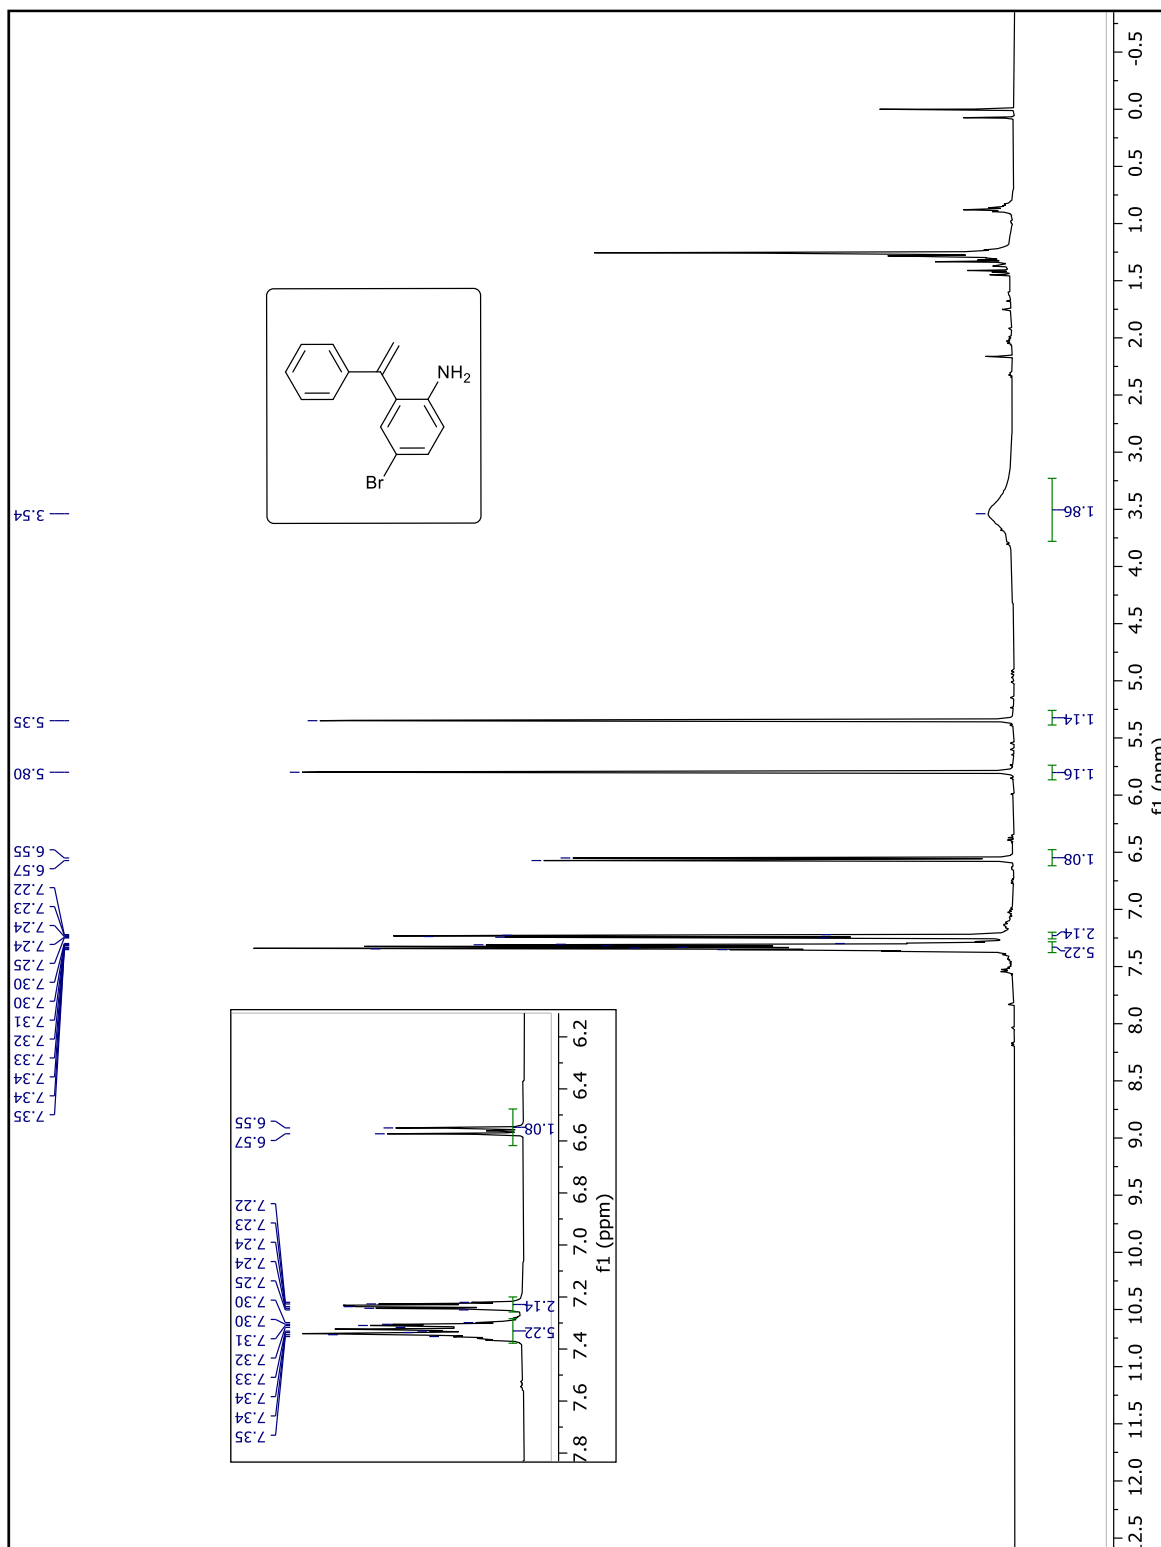

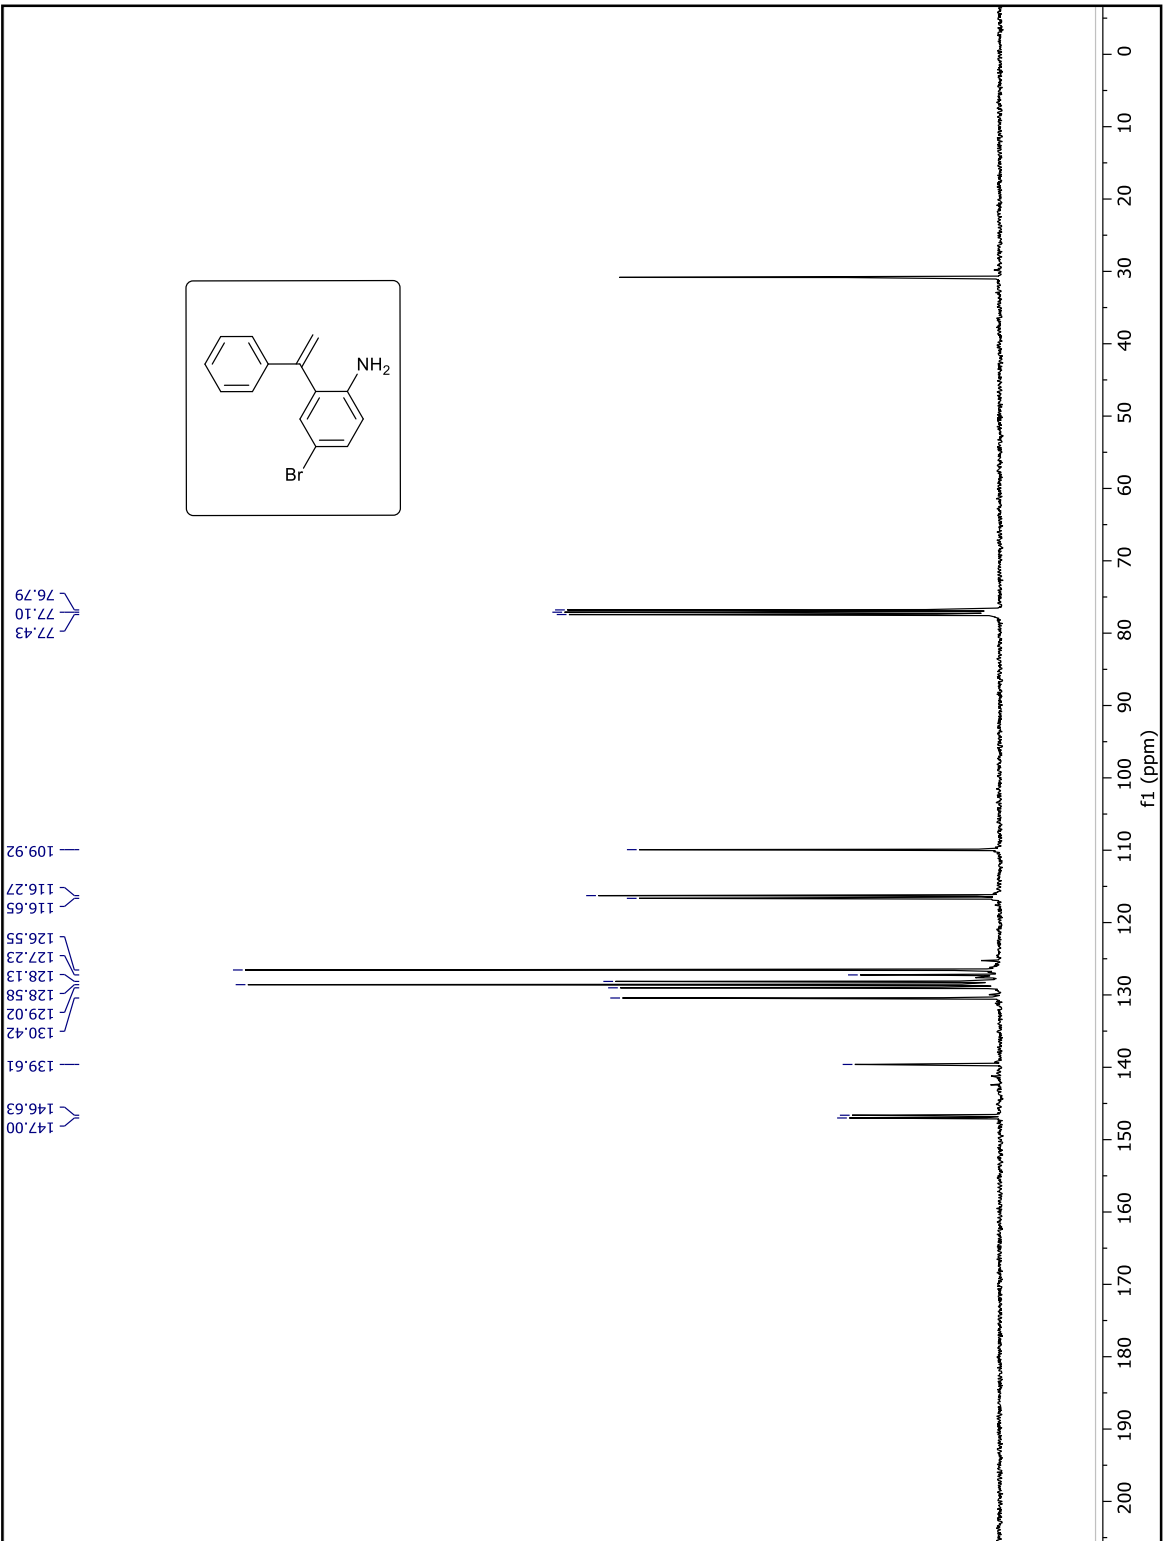



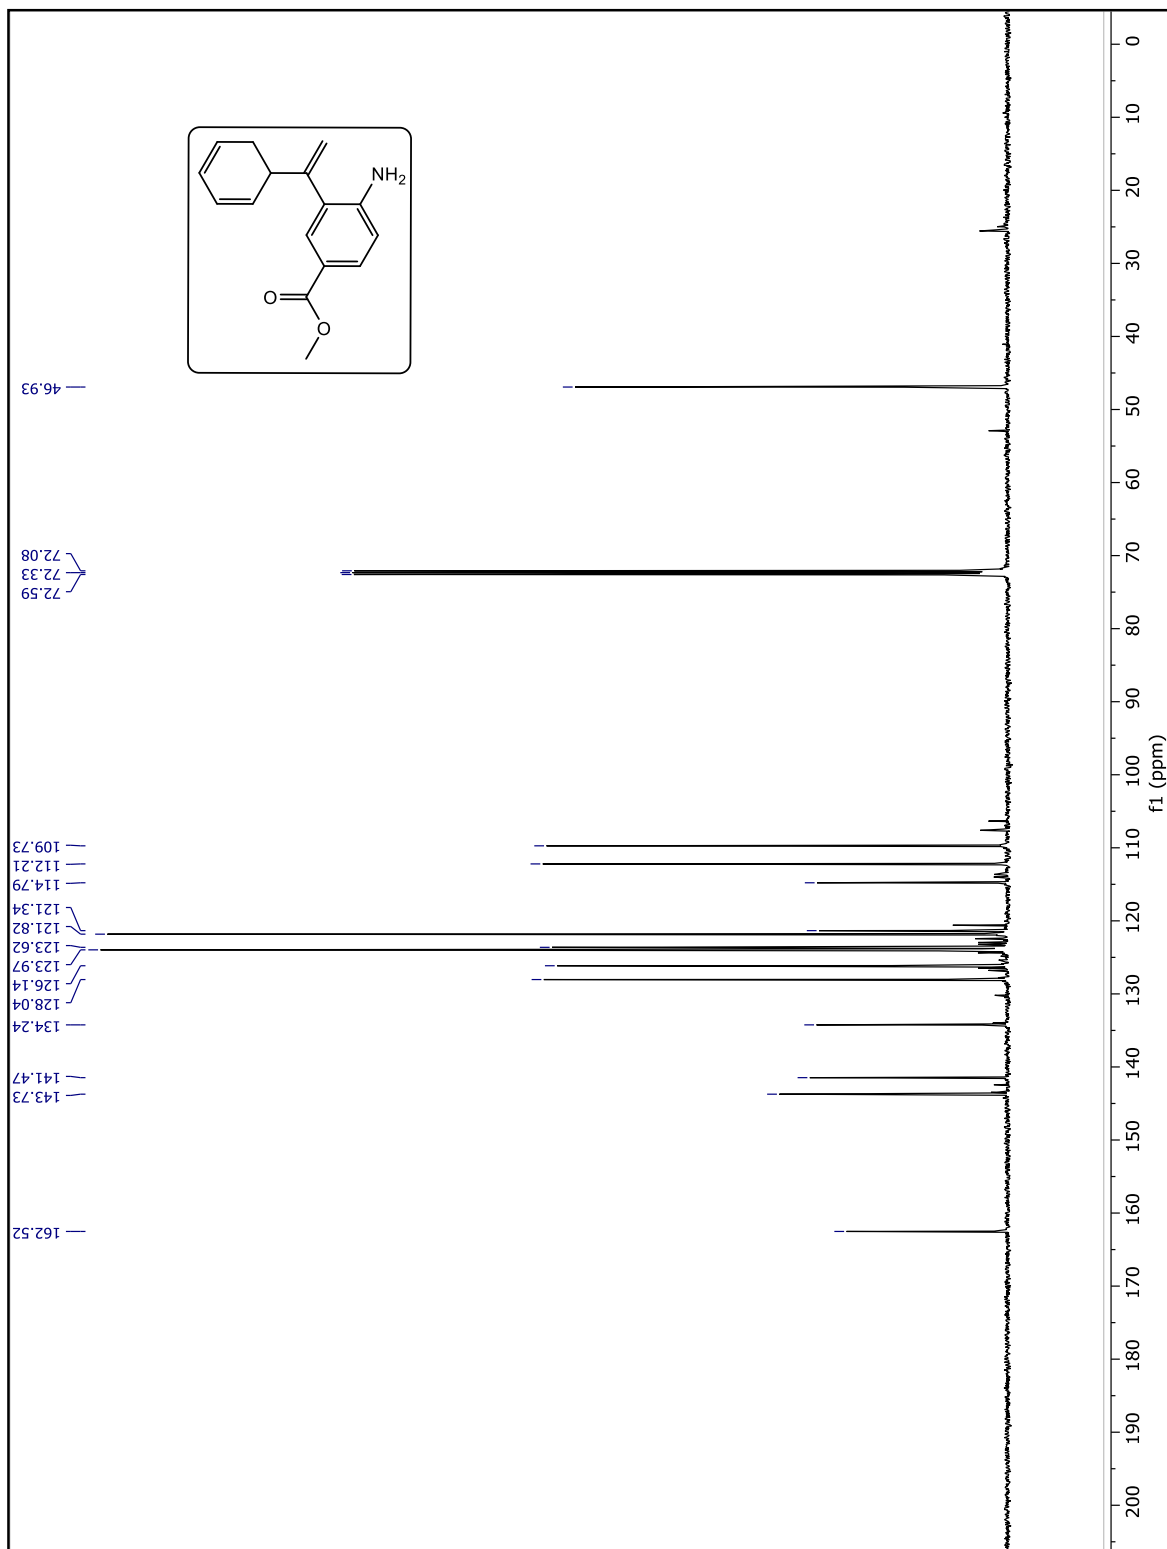

Ethyl 4-amino-3-(1-(cyclohexa-2,4-dien-1-yl)vinyl)benzoate (1k)

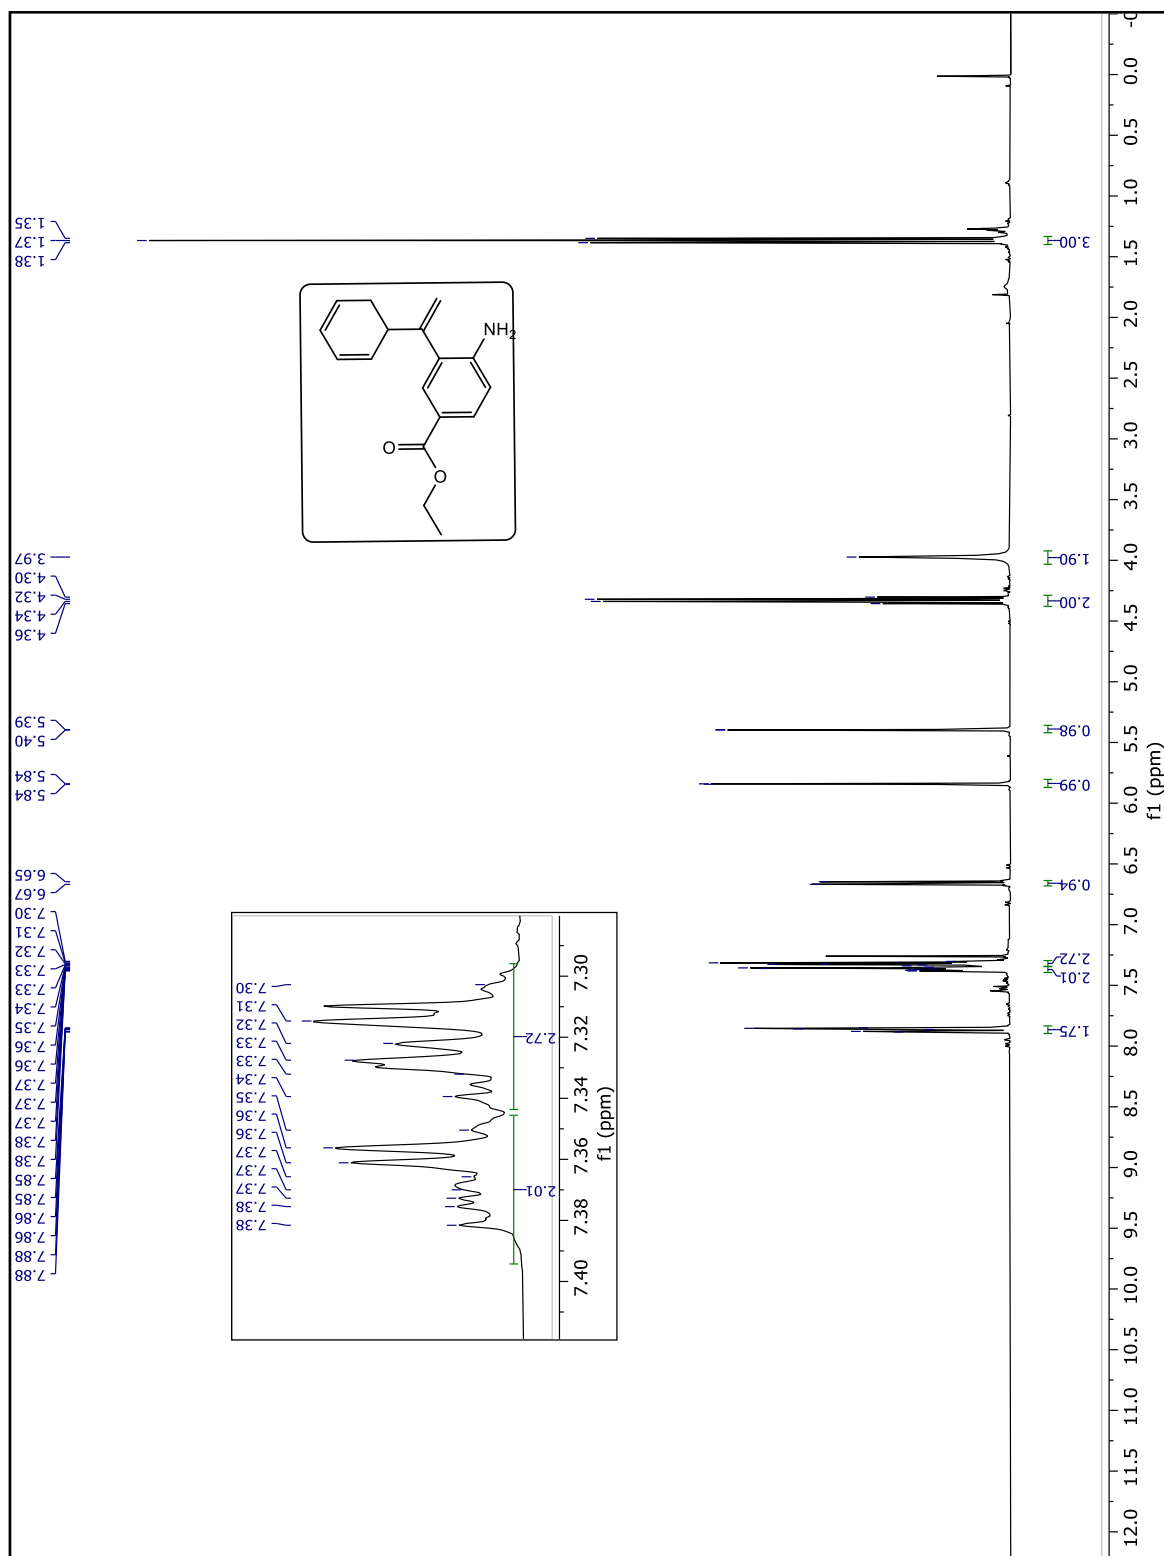

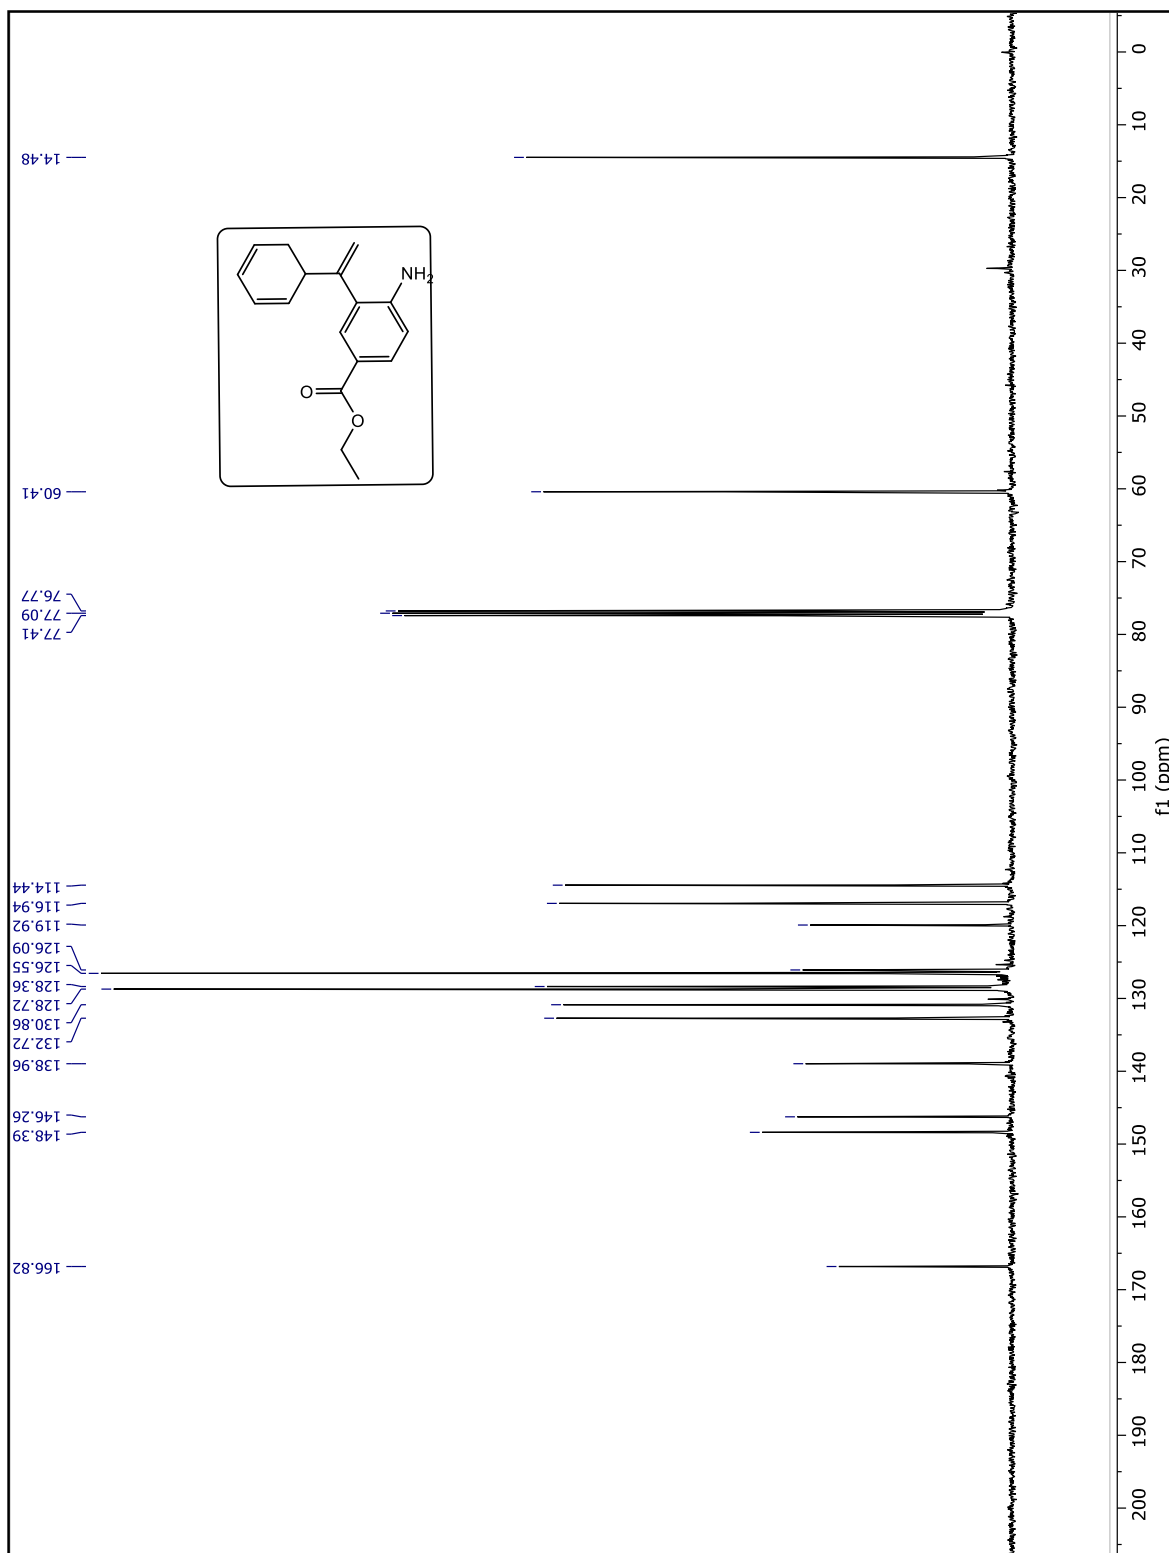

### 3-(1-Phenyl)vinylaphthalen-2-amine (1n)

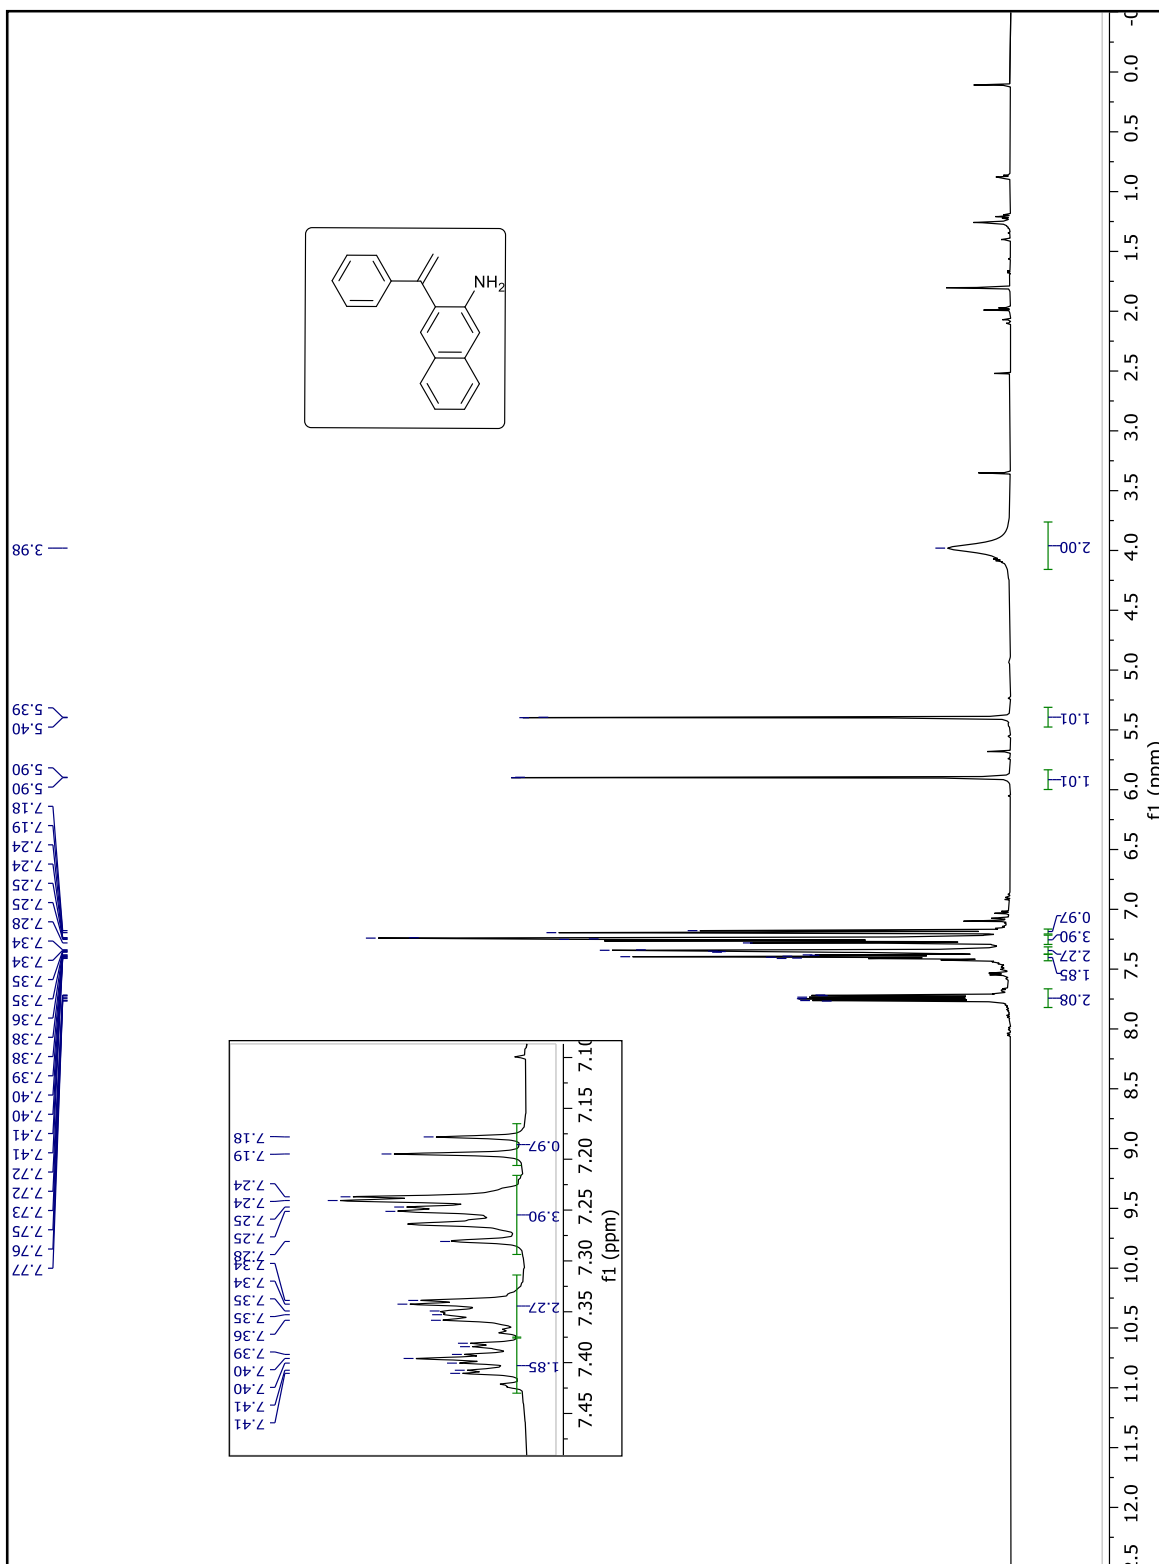

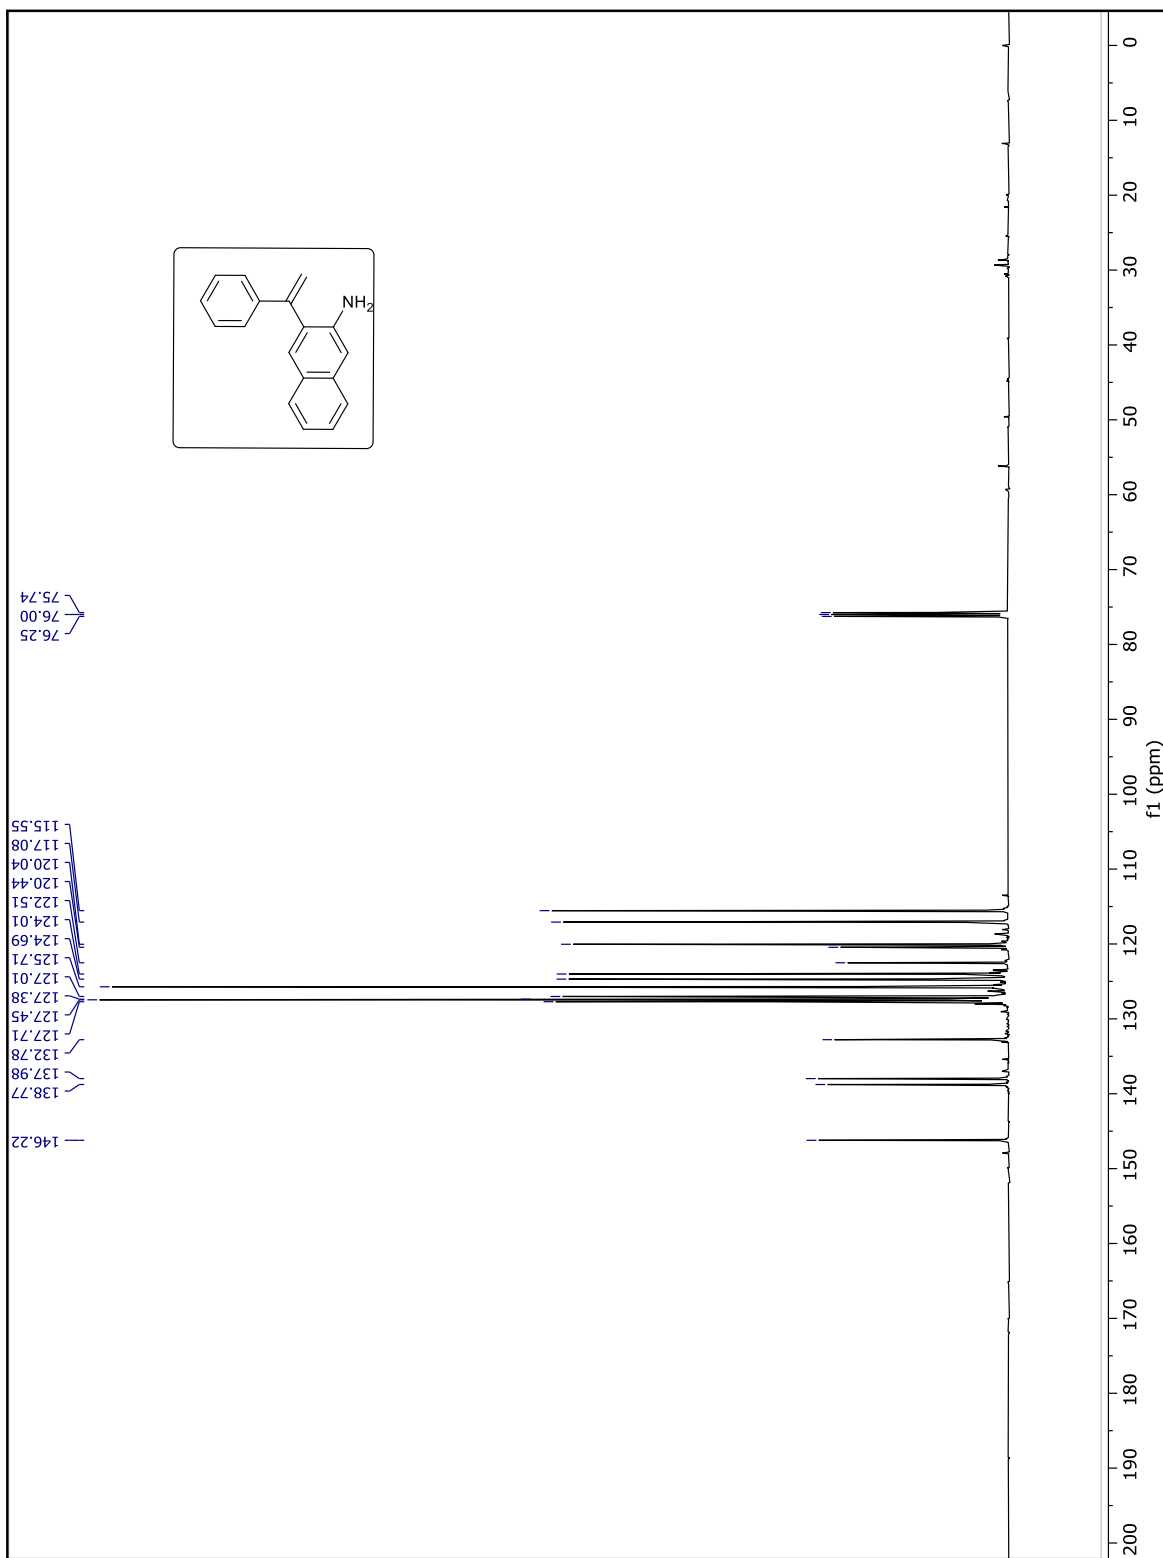

Methyl 3-methyl-1H-indole-2-carboxylate (Table 1, 3a)

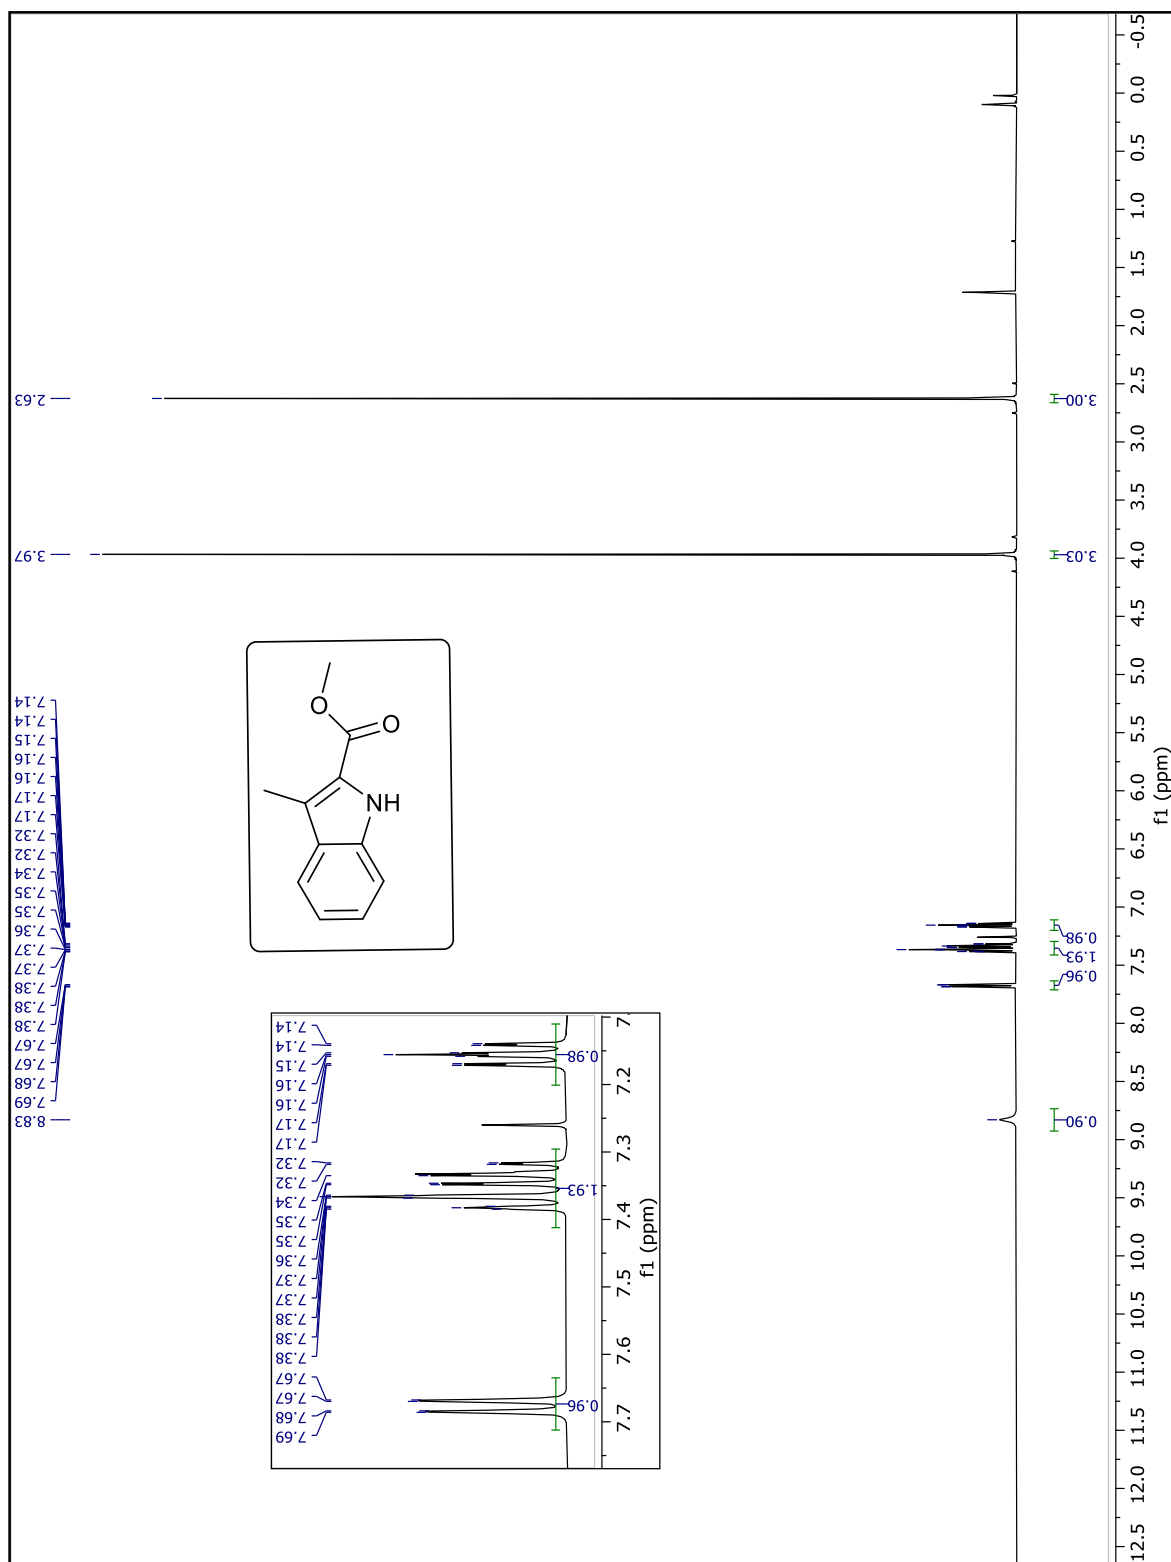

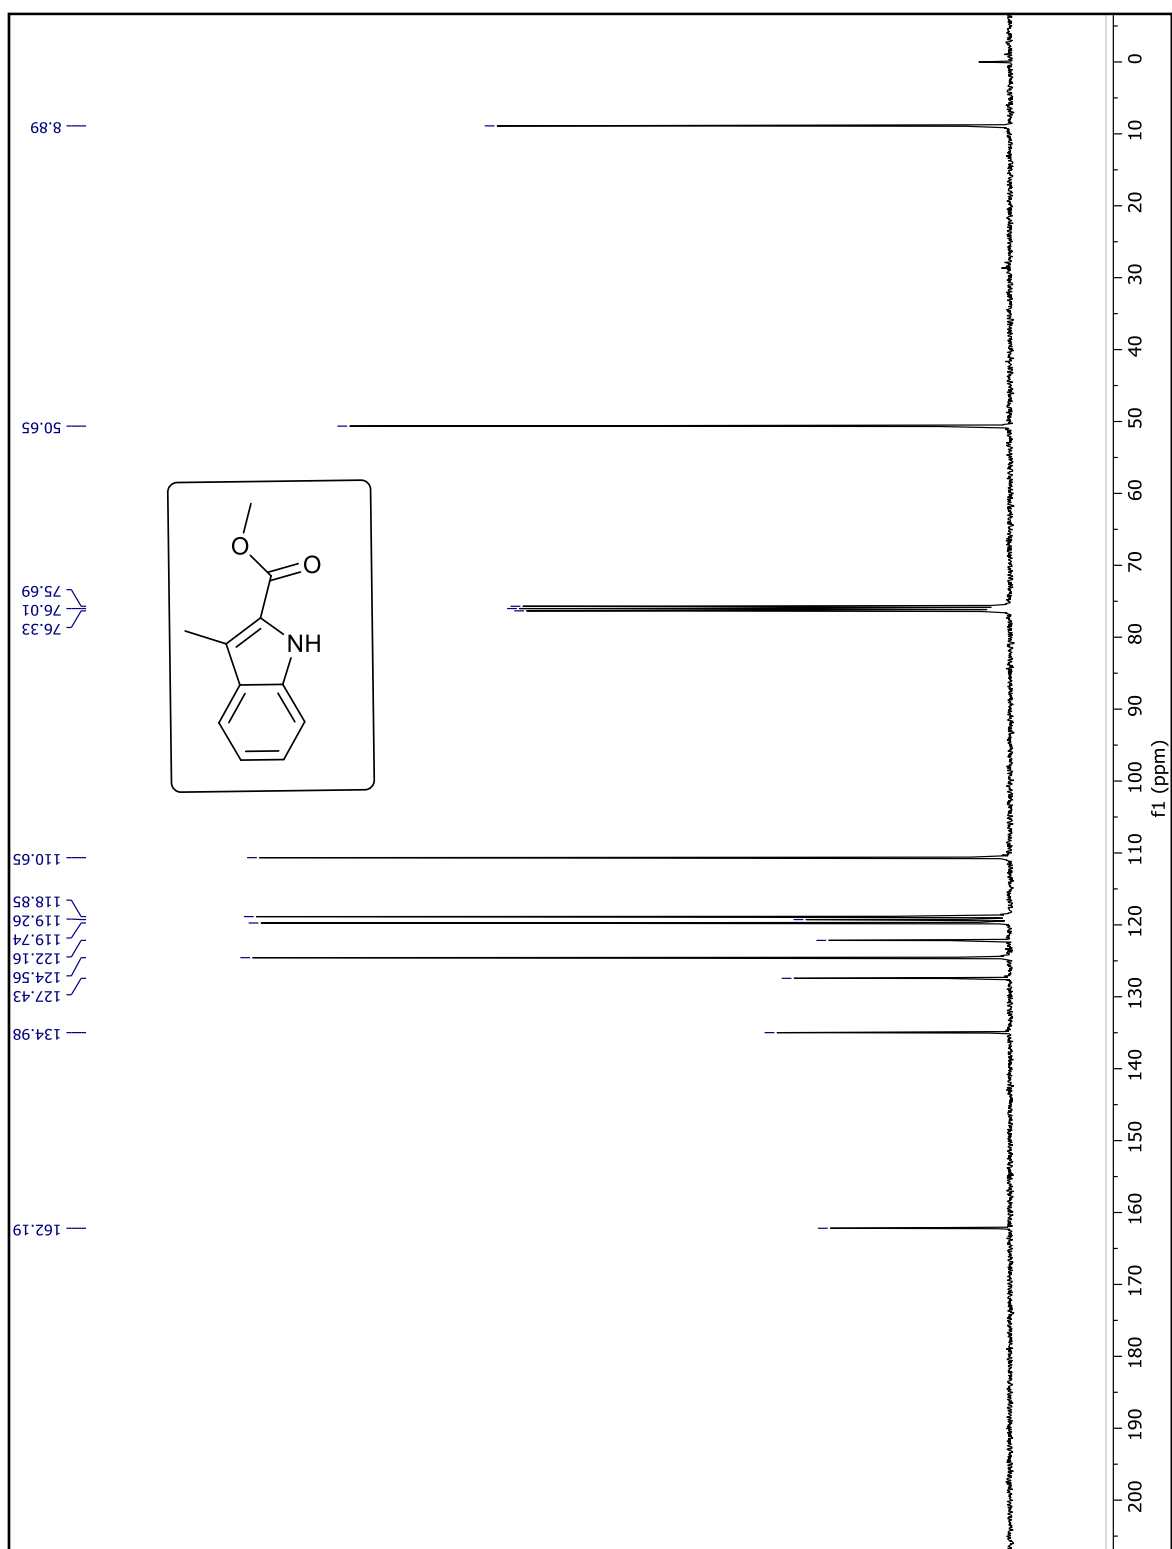

Ethyl 3-methyl-1H-indole-2-carboxylate (Table 1, 3b)

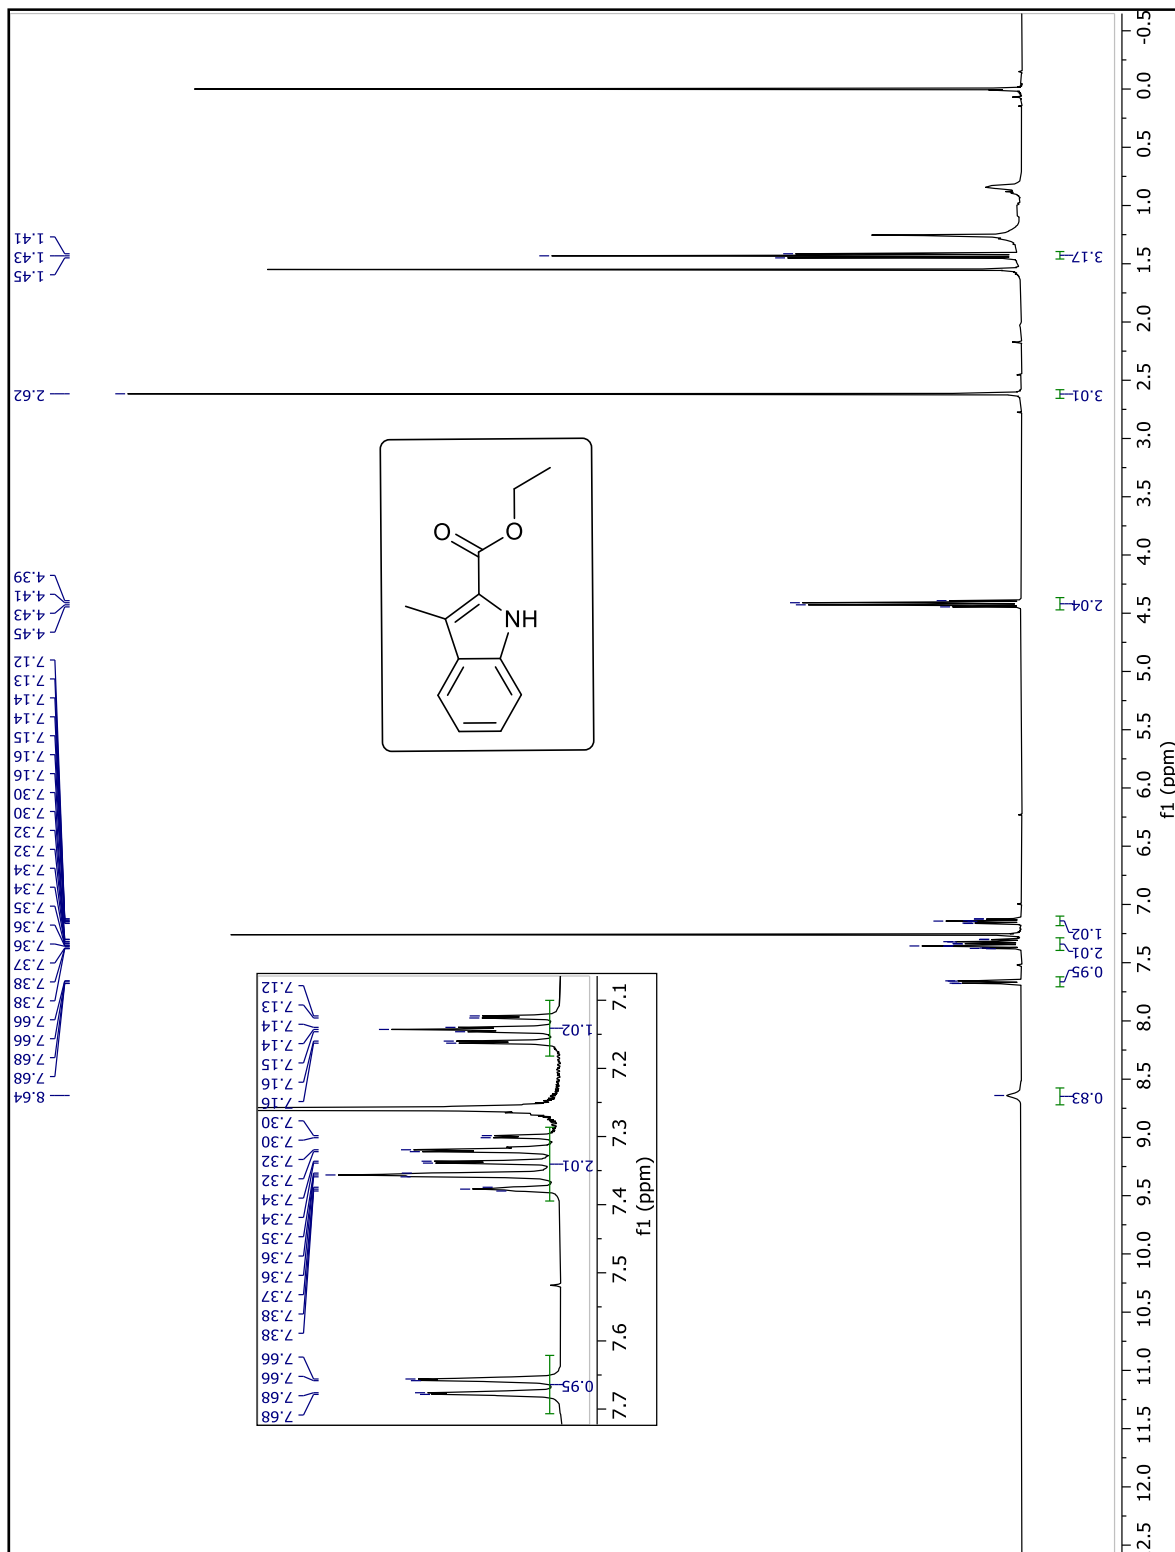

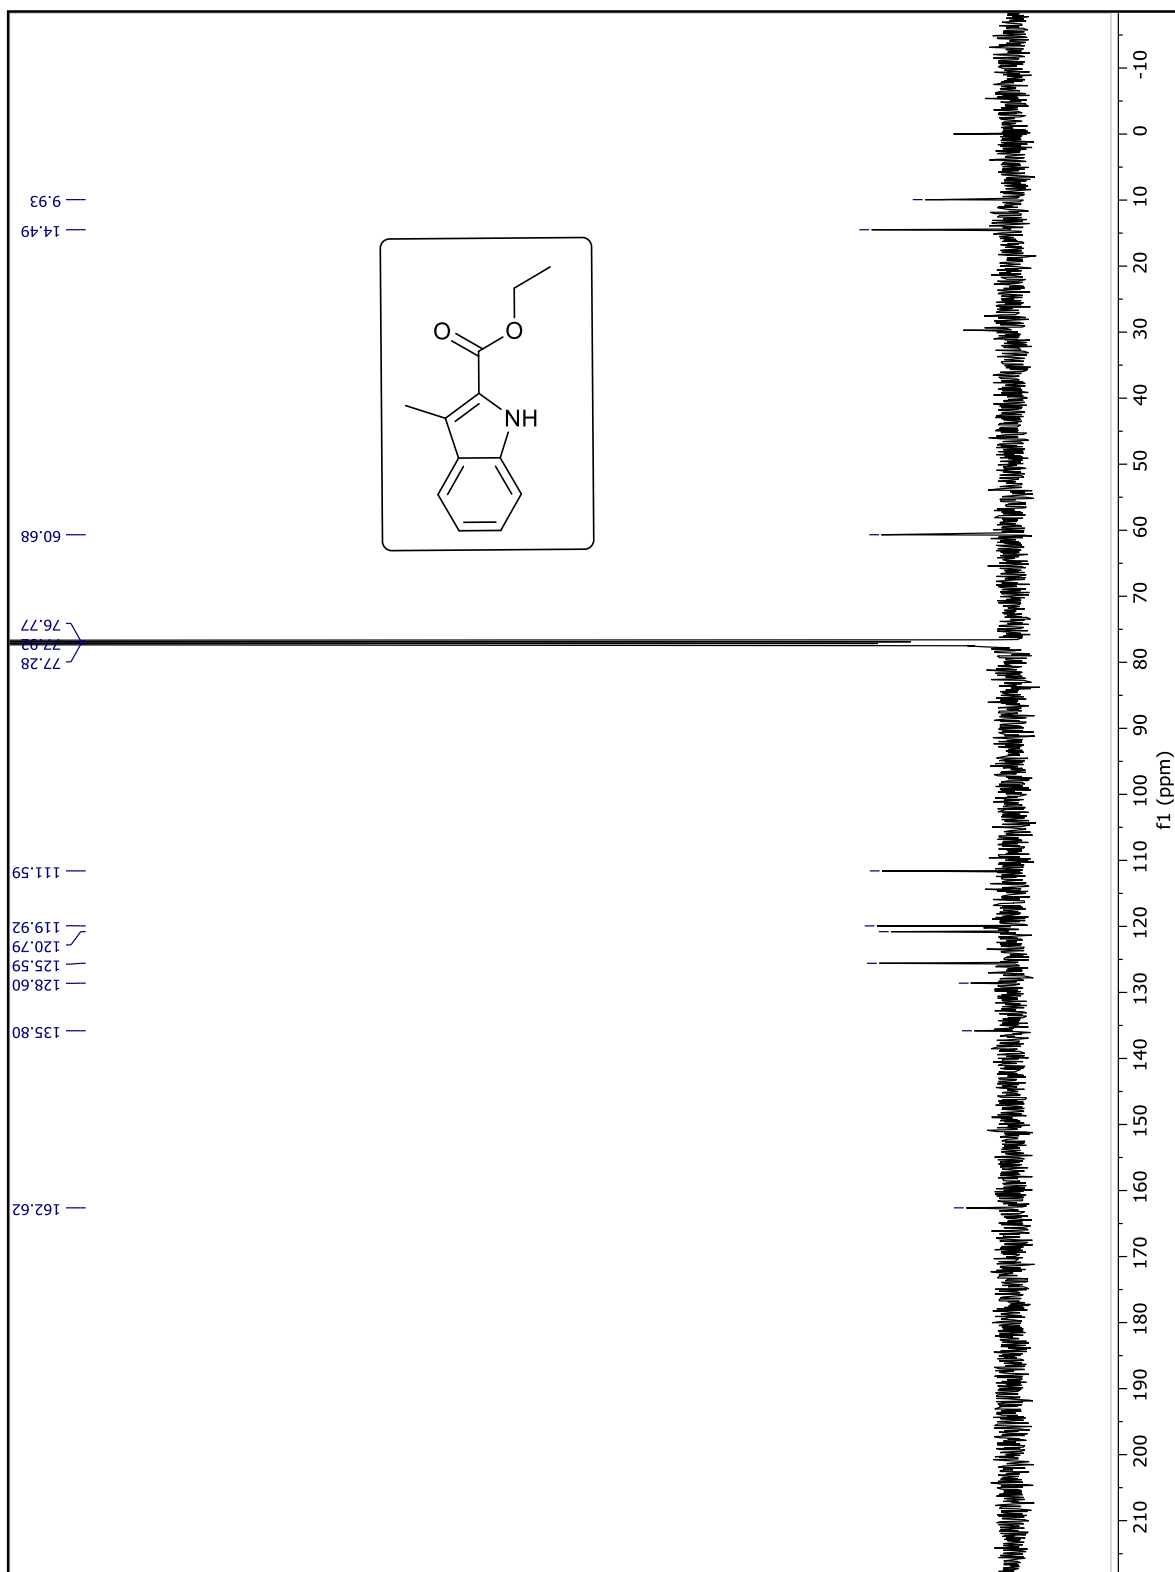

***tert*-Butyl 3-methyl-1*H*-indole-2-carboxylate (Table 1, 3c)**

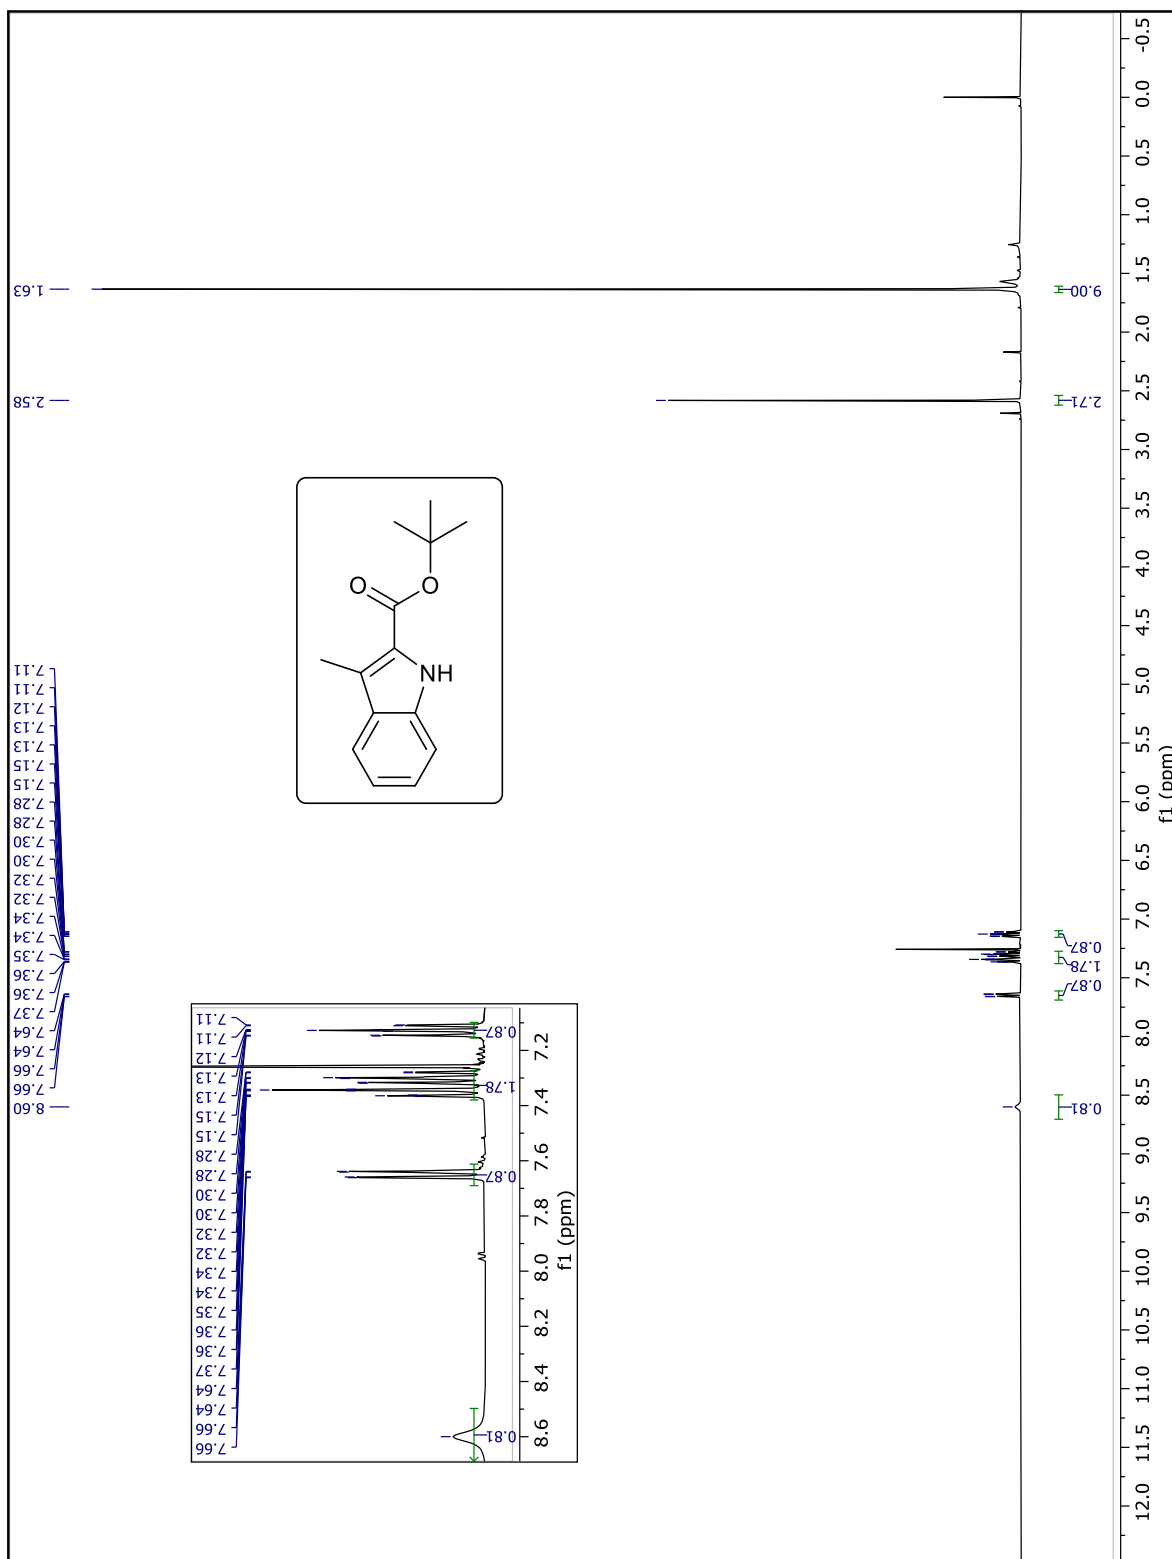

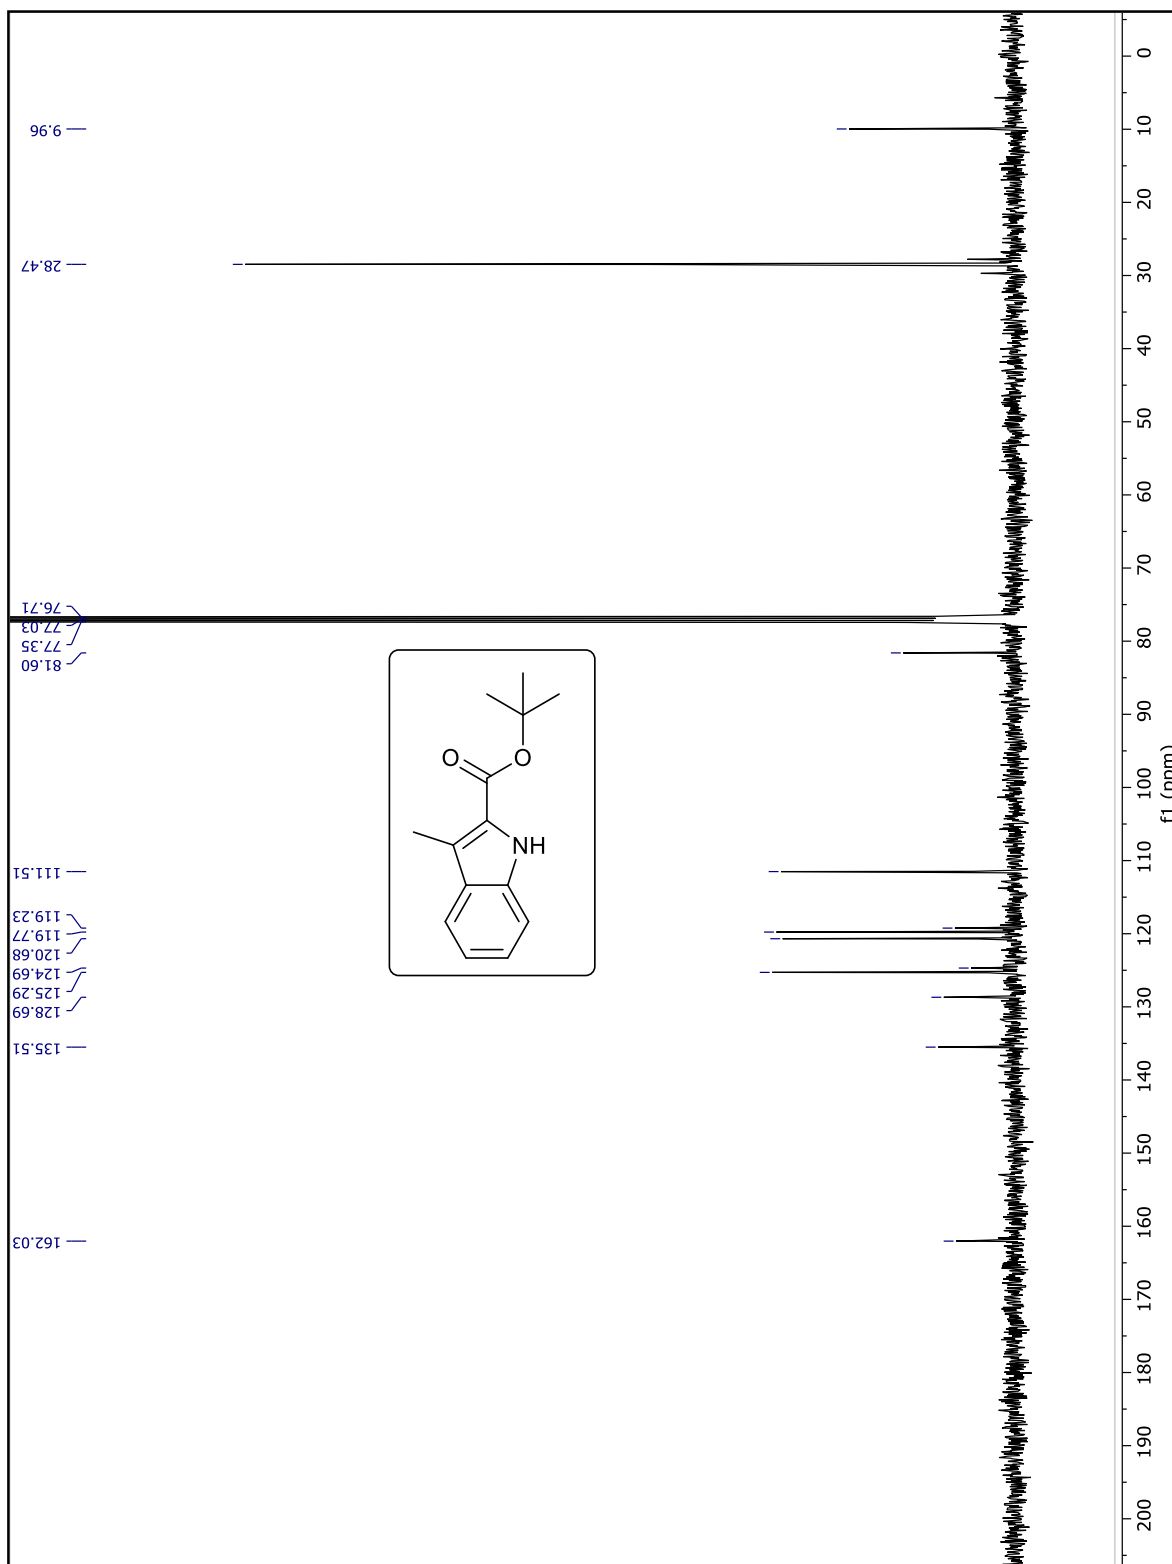

Methyl 3-phenyl-1H-indole-2-carboxylate (Table 1, 3d)

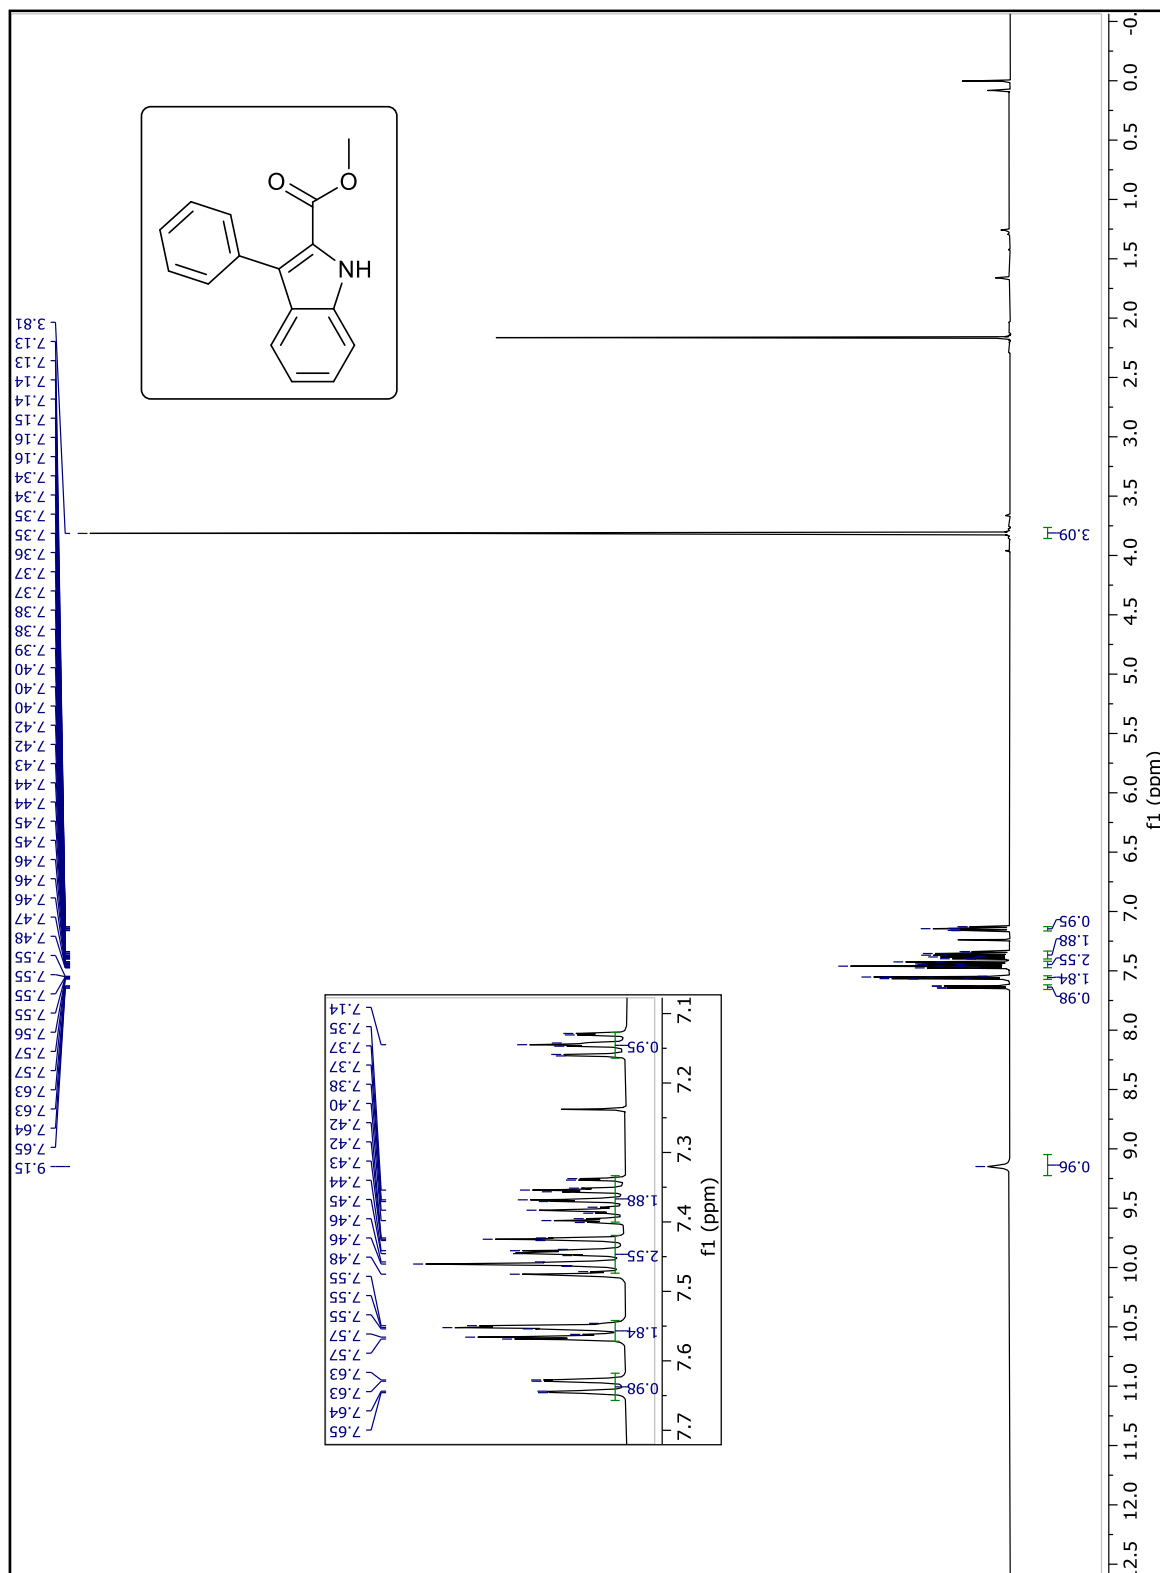

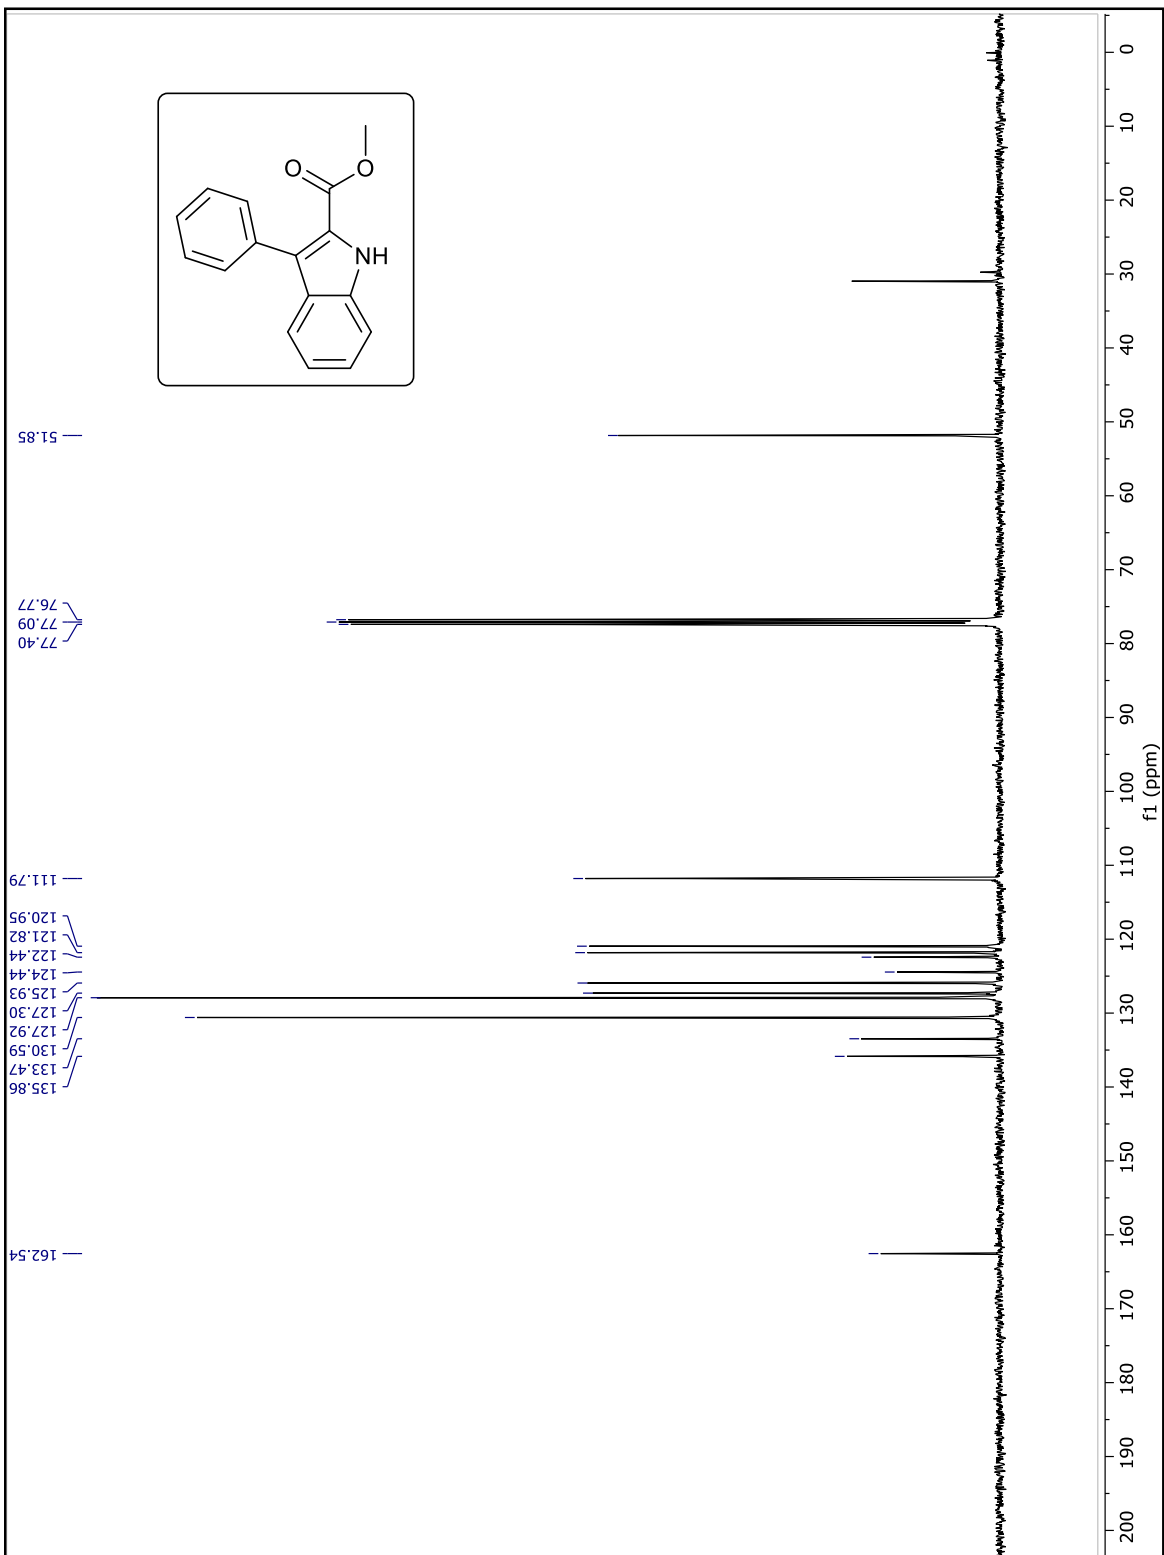



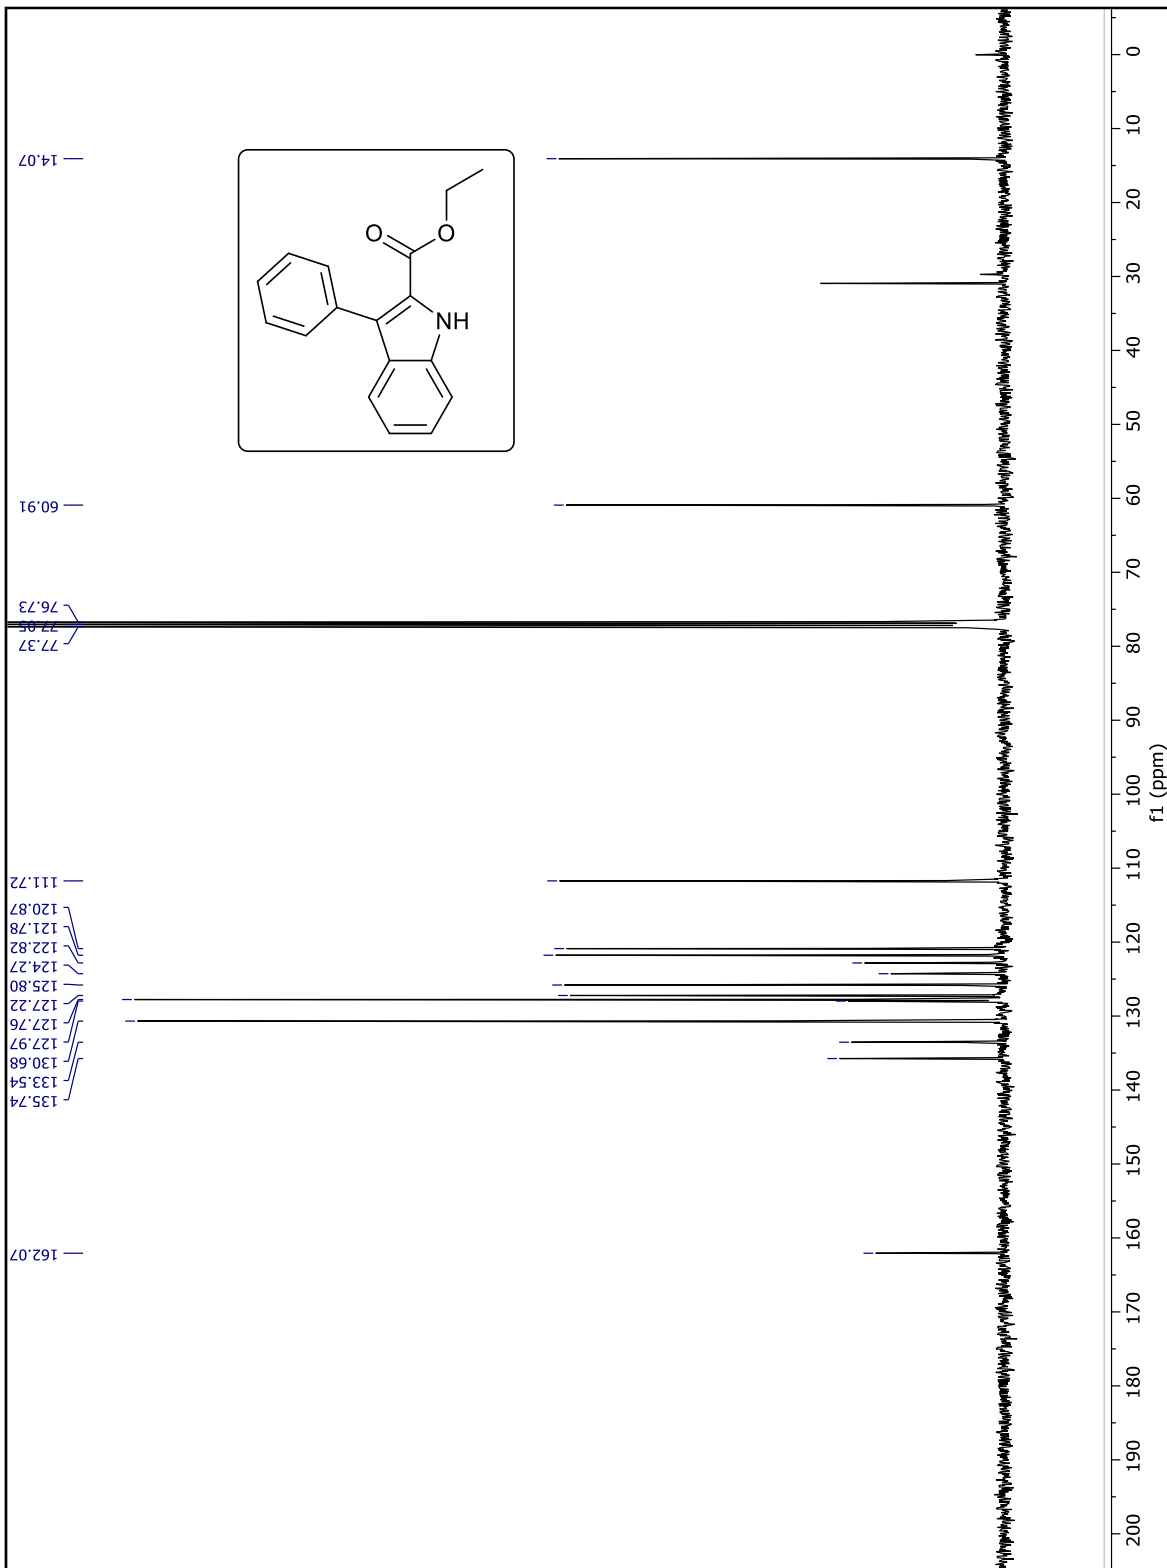

Methyl 5-methoxy-3-phenyl-1H-indole-2-carboxylate (Table 1, 3f)

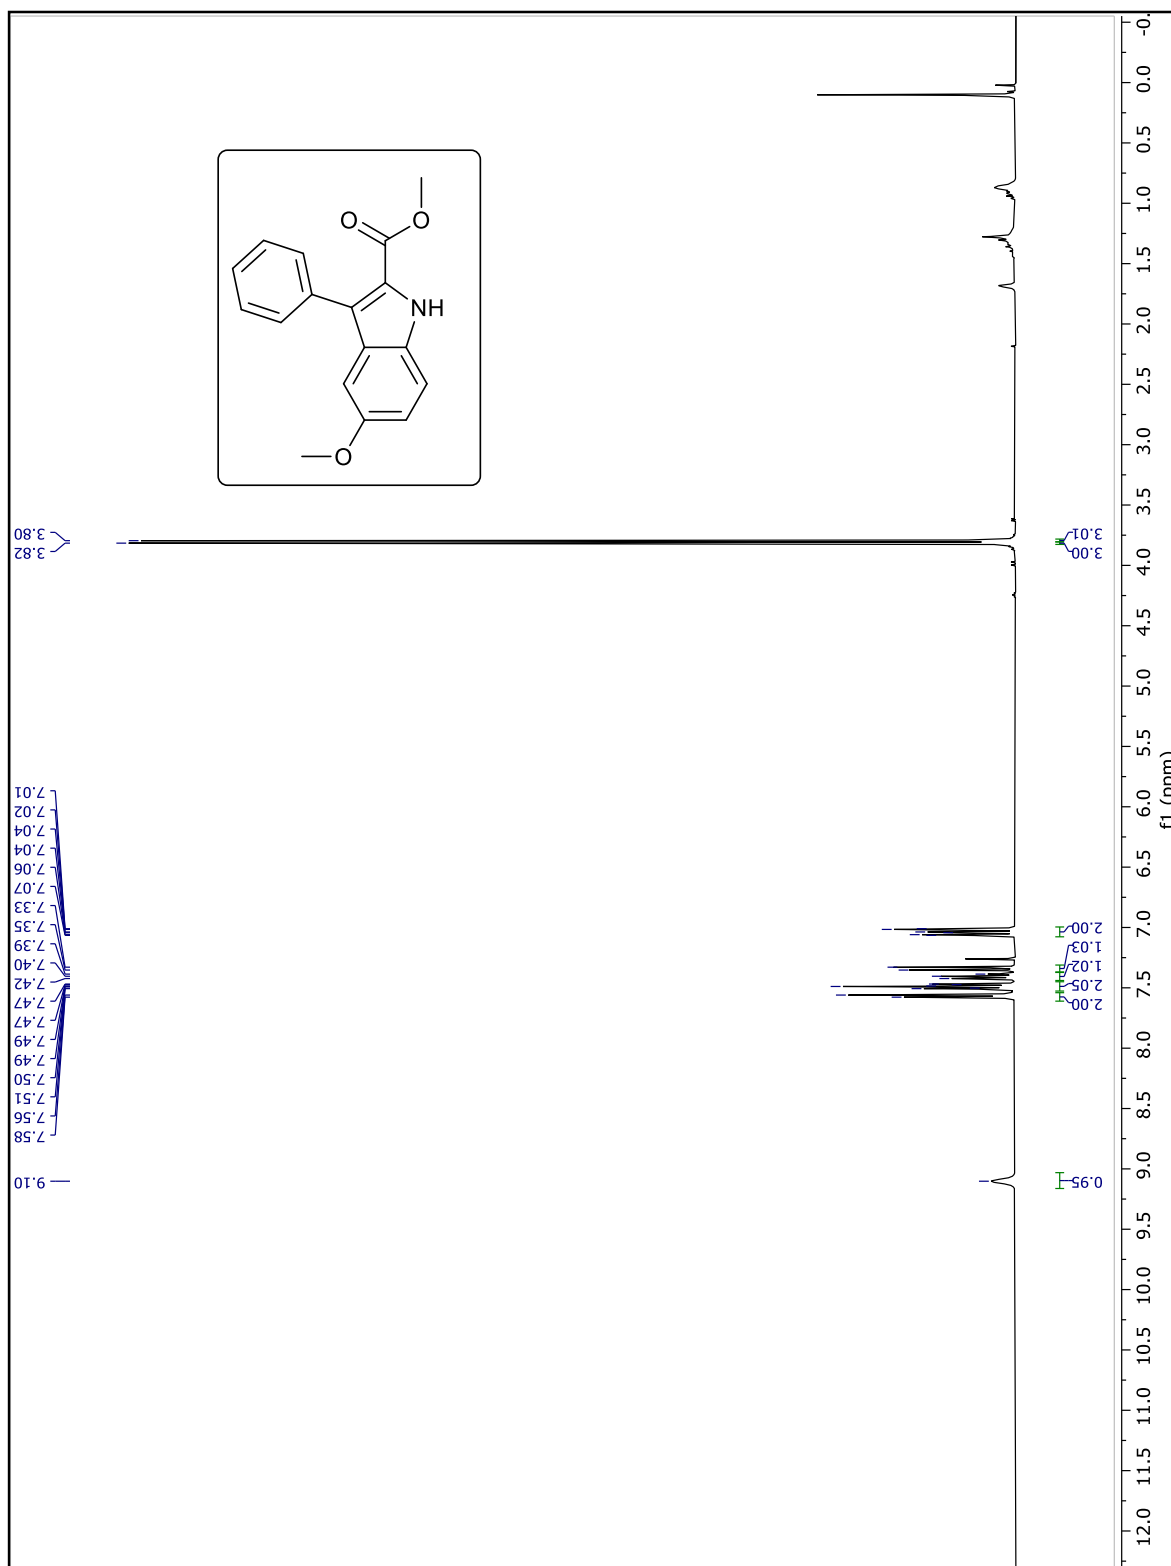

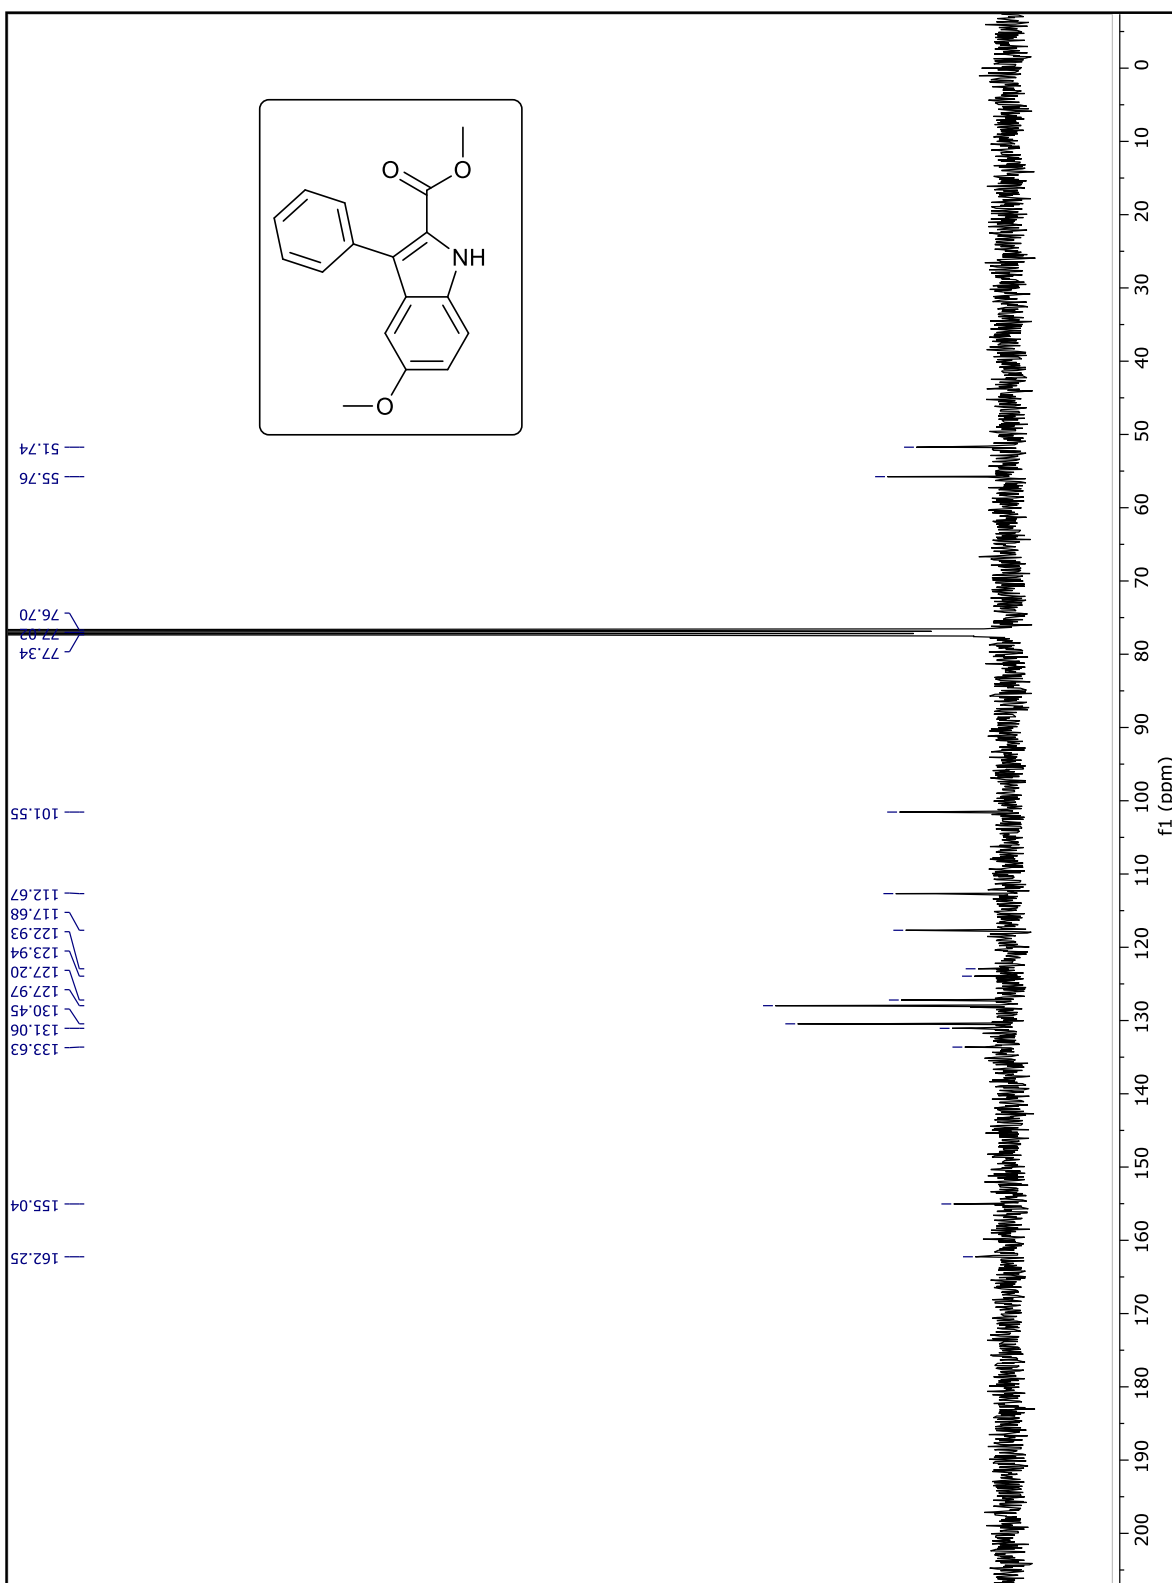

**Ethyl 5-methoxy-3-phenyl-1H-indole-2-carboxylate (Table 1, 3g)**

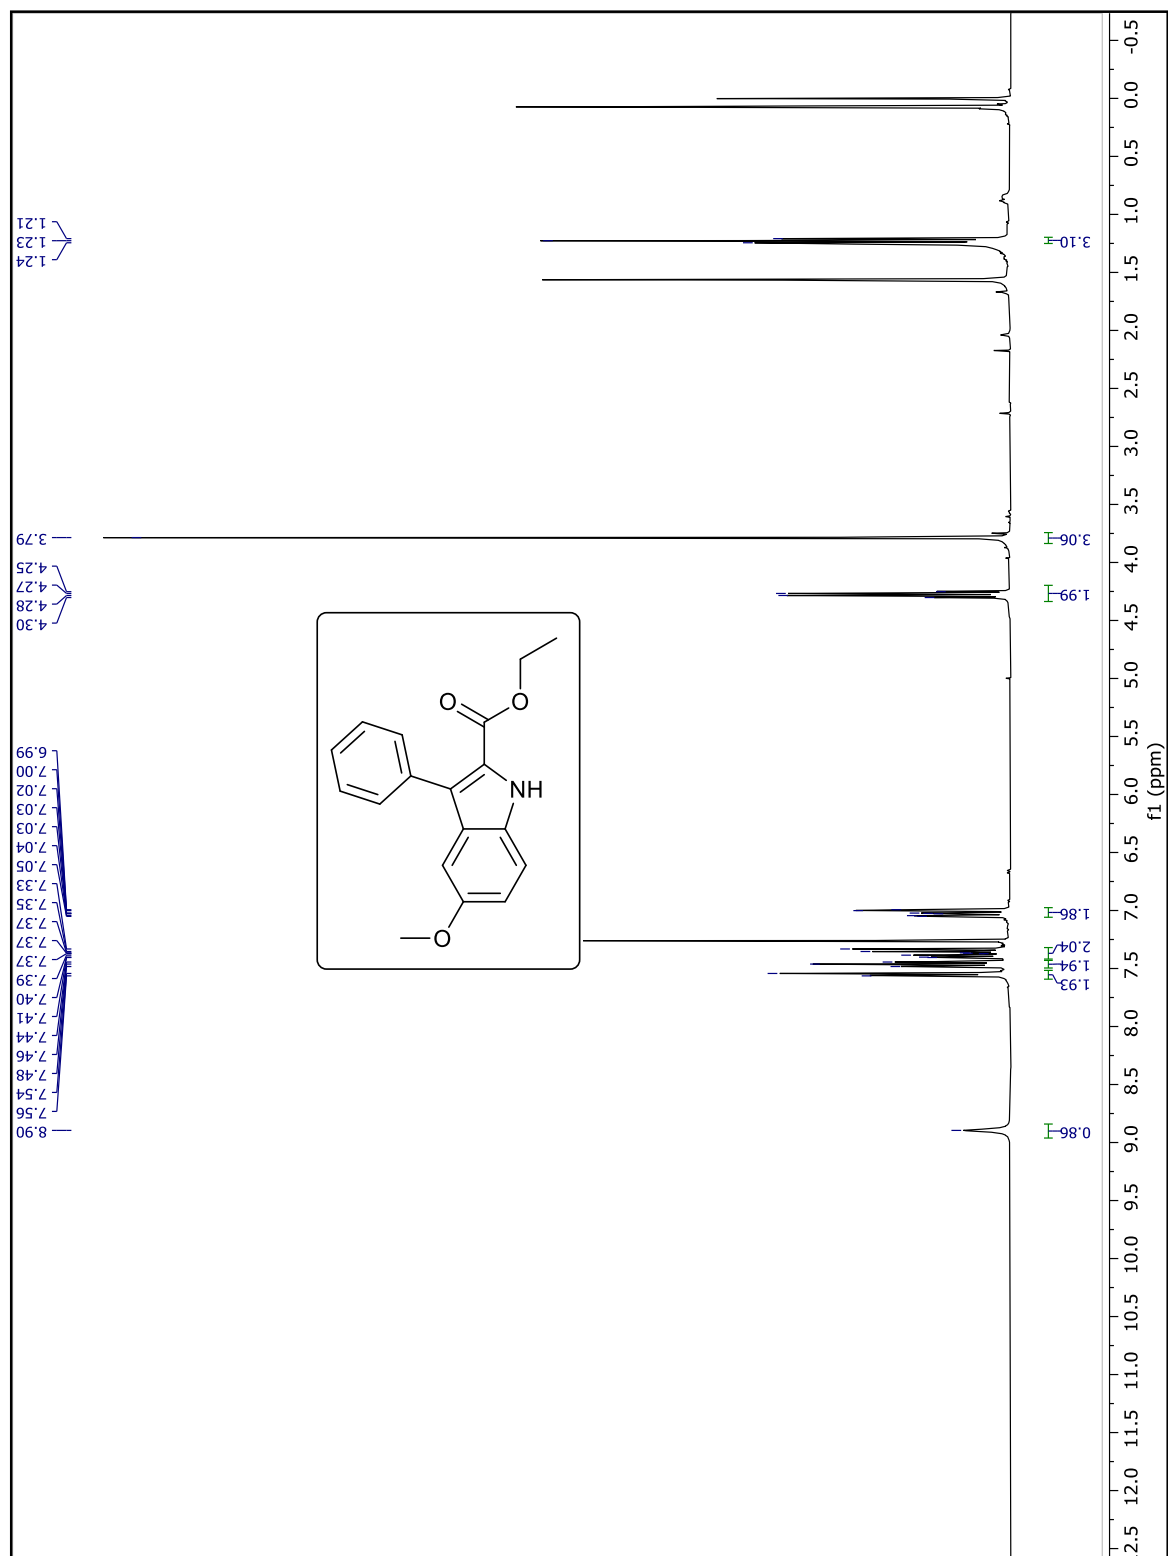

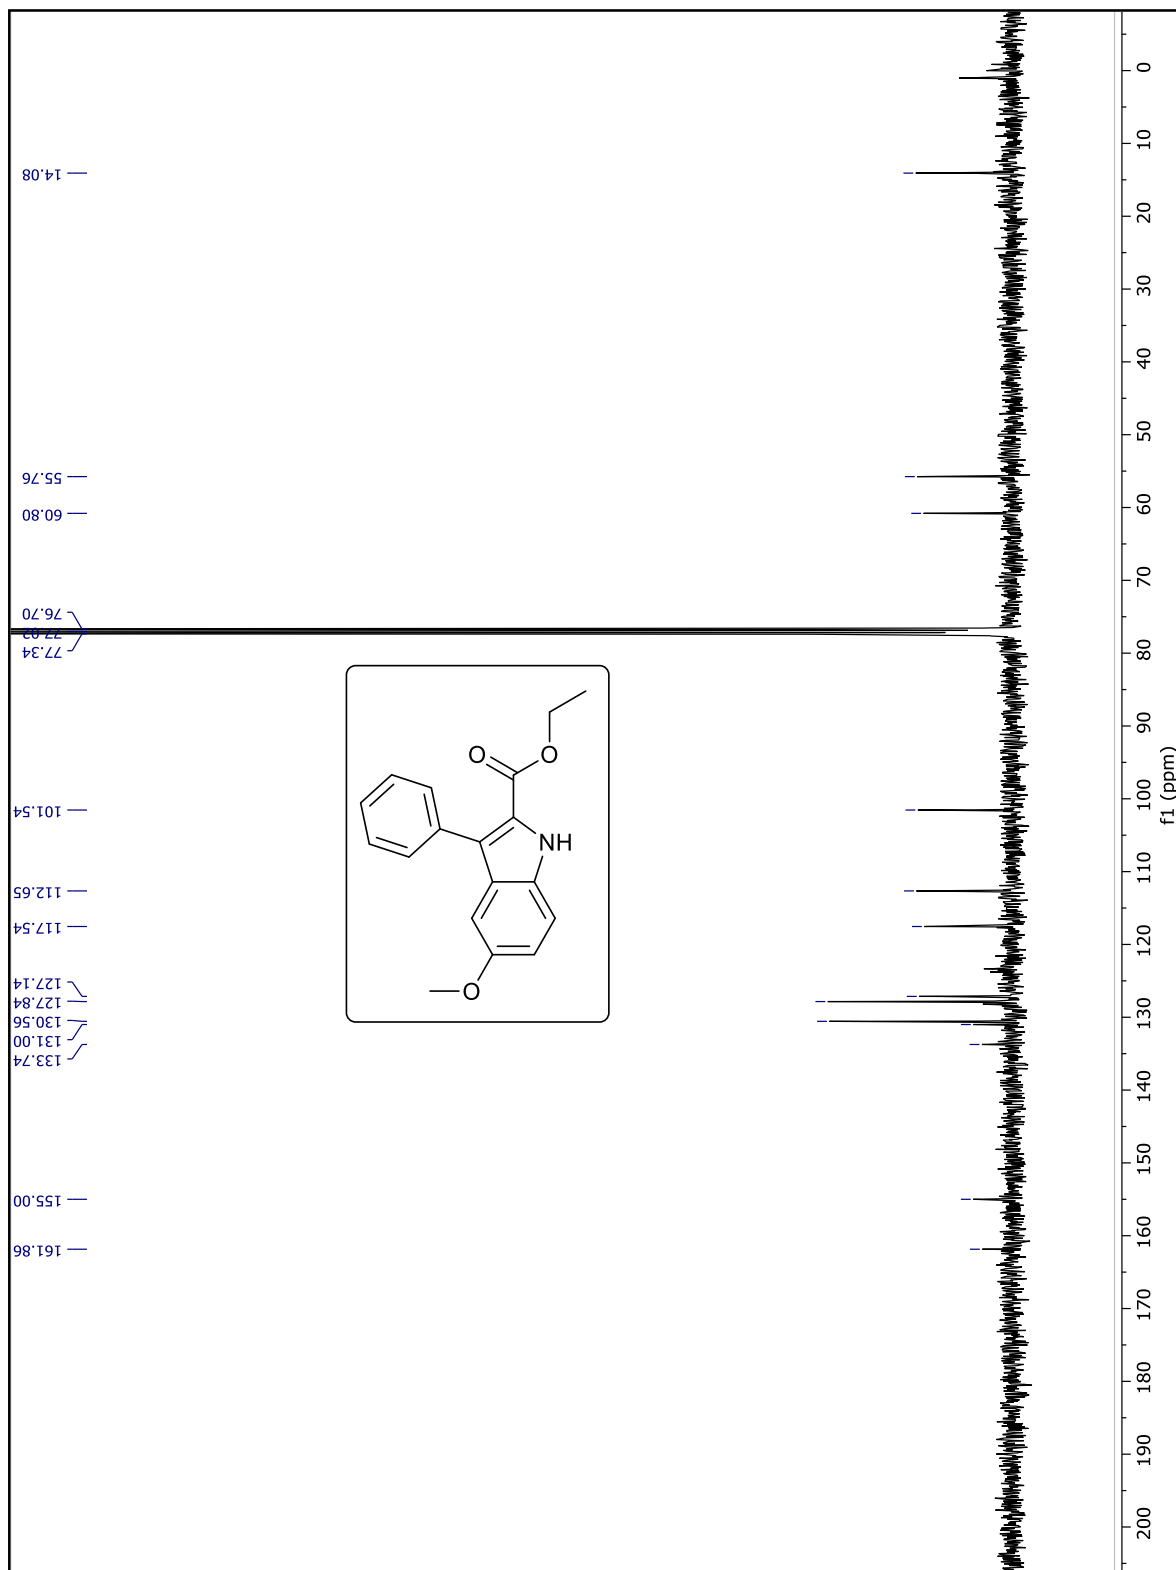

Methyl 7-methoxy-3-phenyl-1H-indole-2-carboxylate (Table 1, 3h)

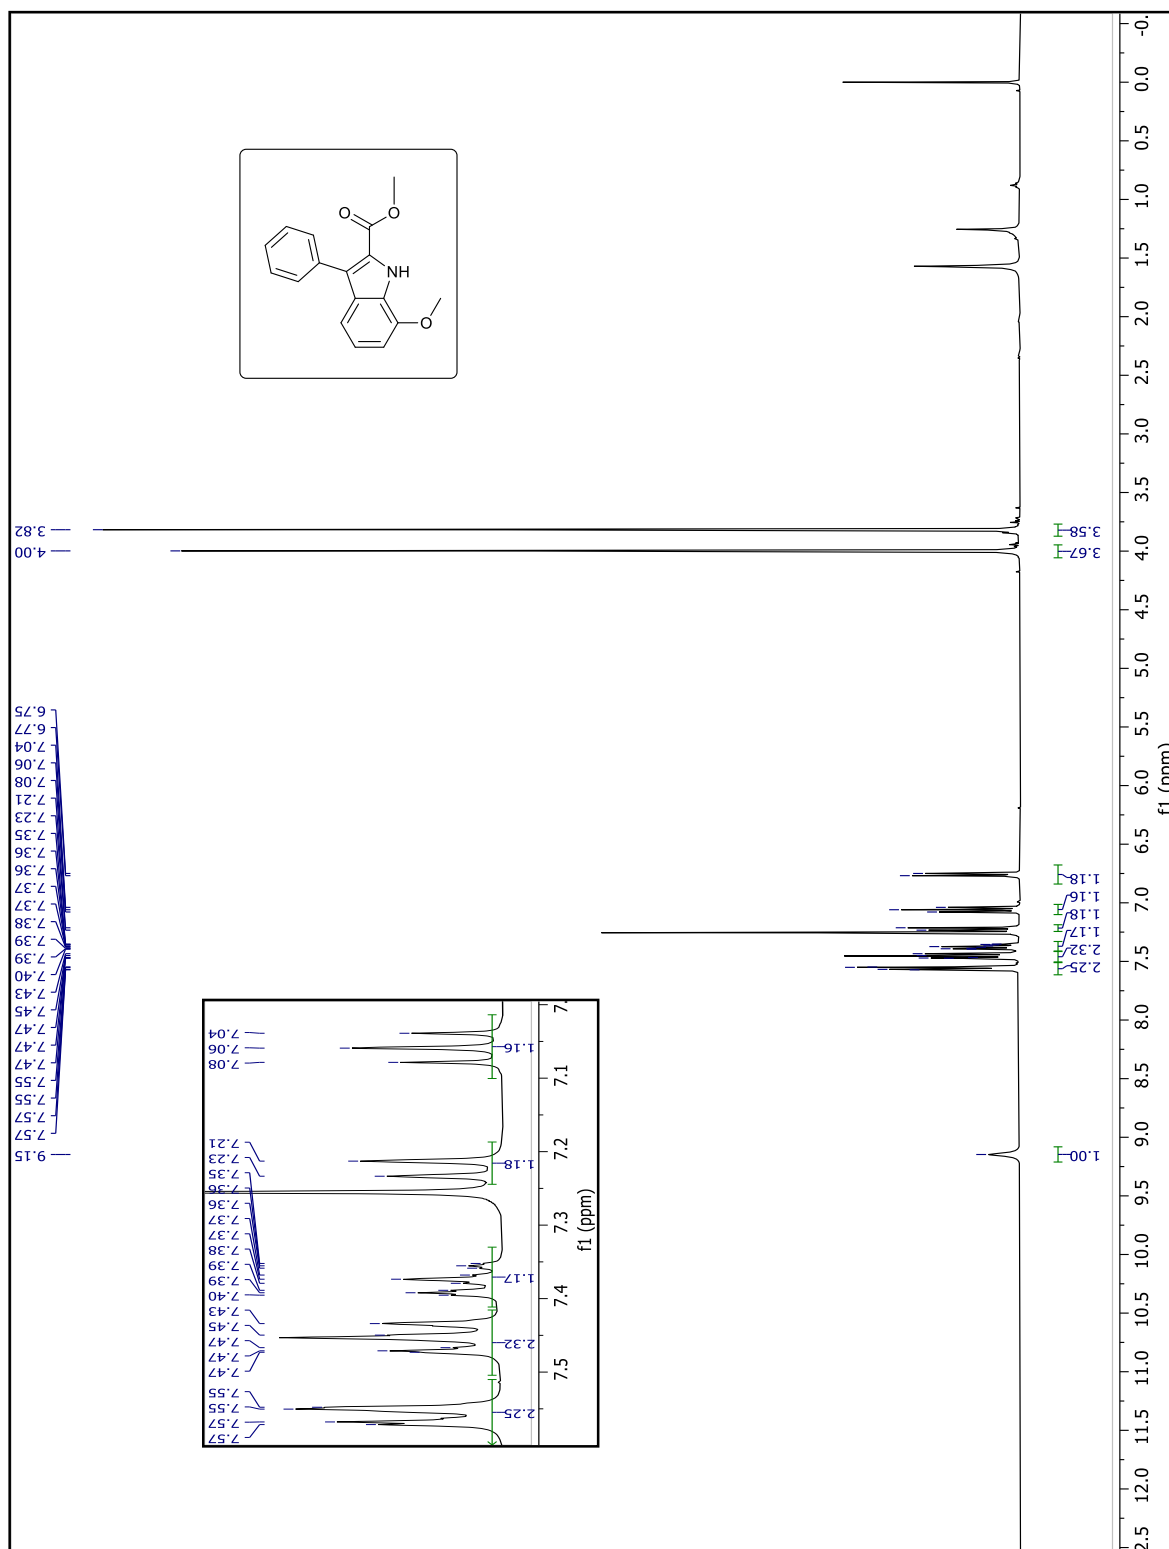

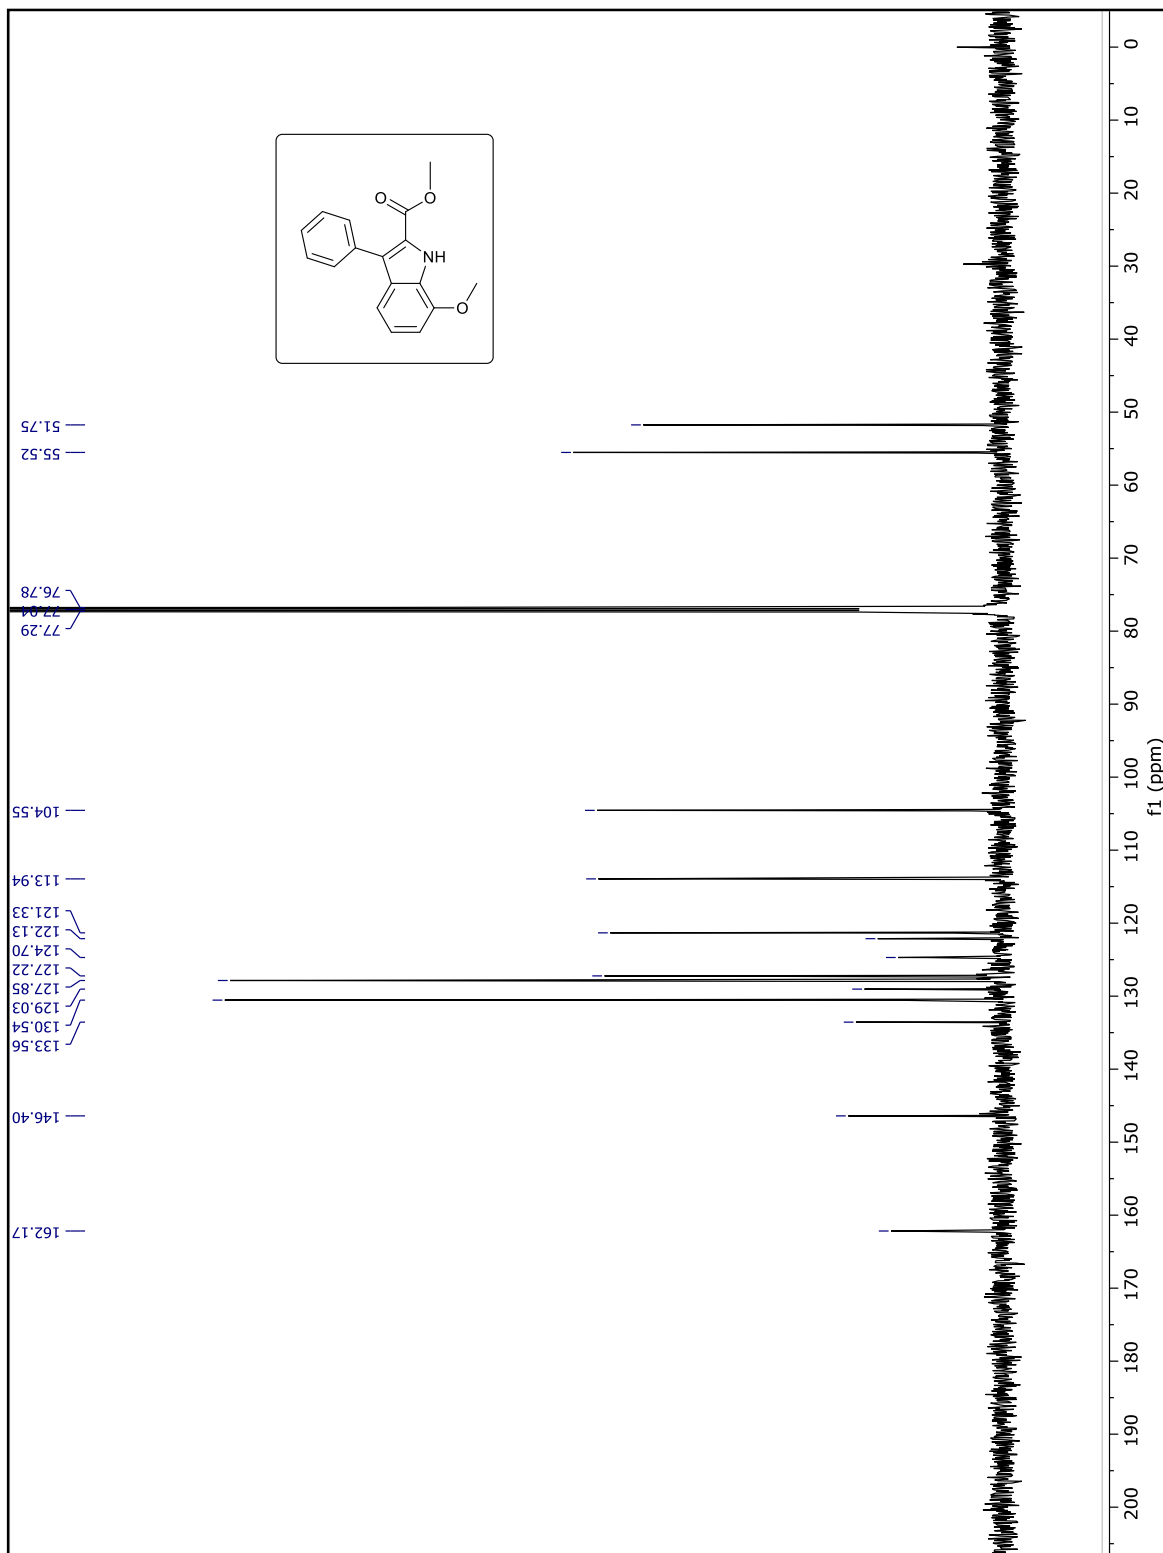

Ethyl 7-methoxy-3-phenyl-1H-indole-2-carboxylate (Table 1, 3i)

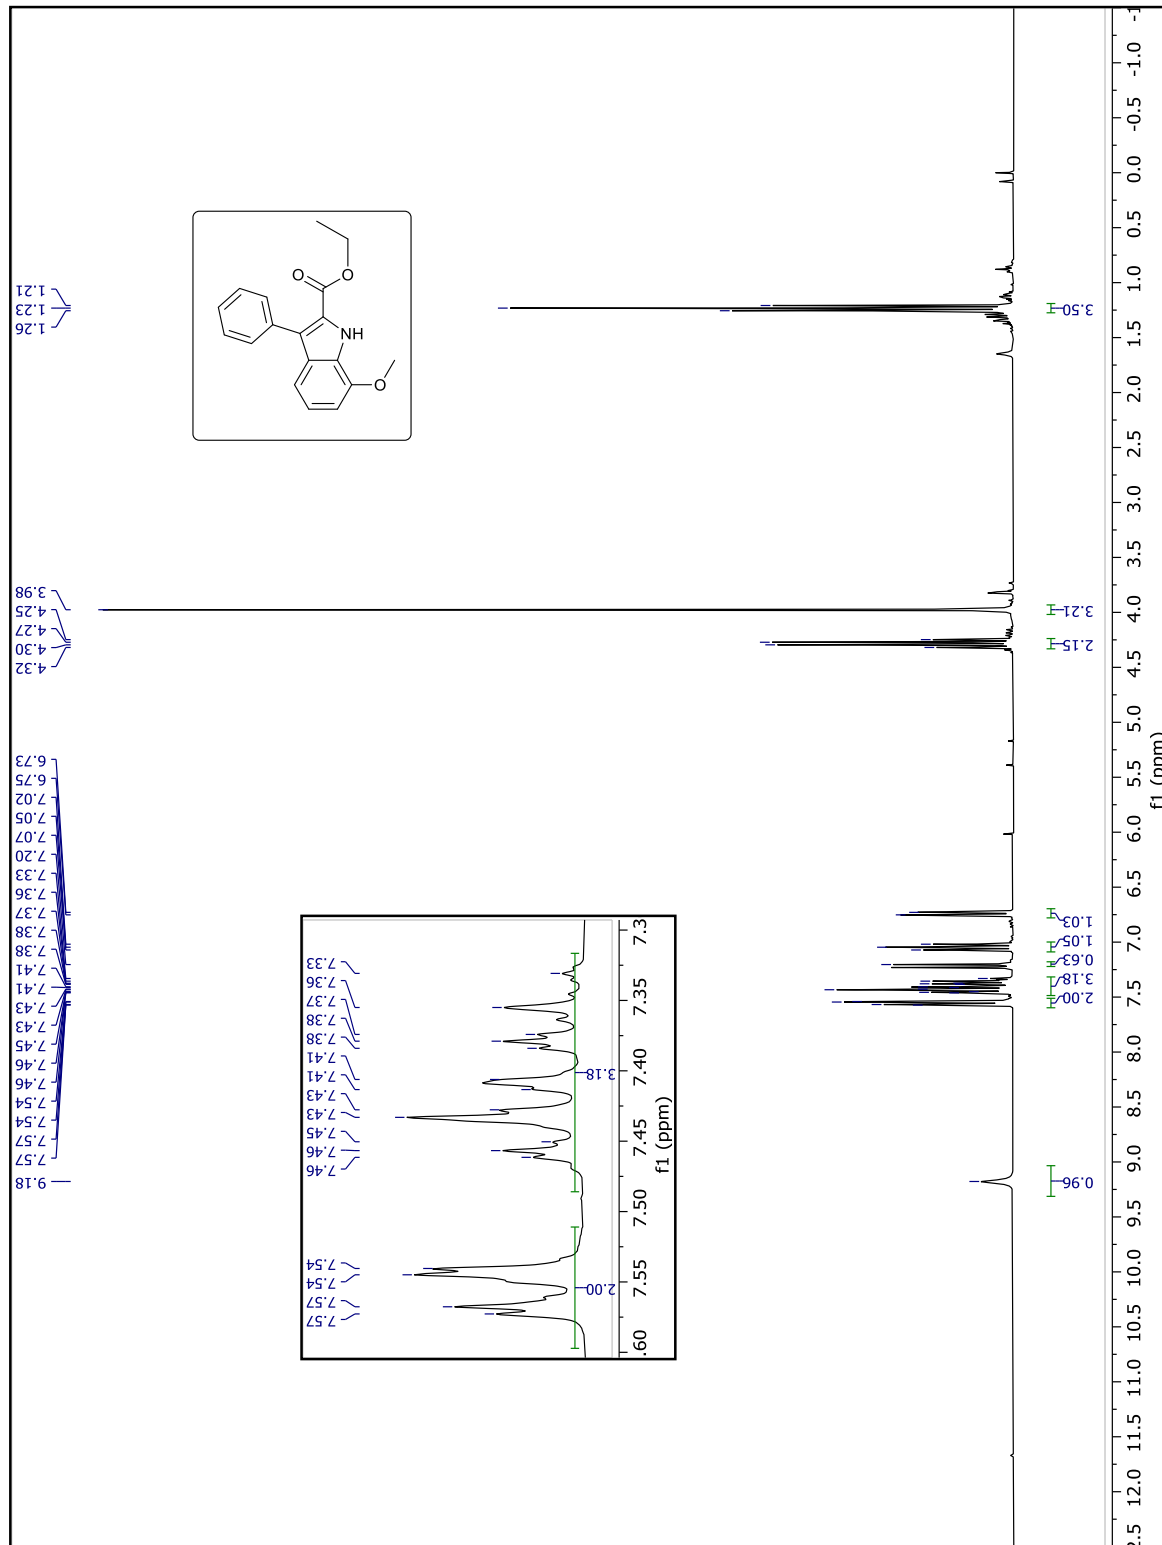

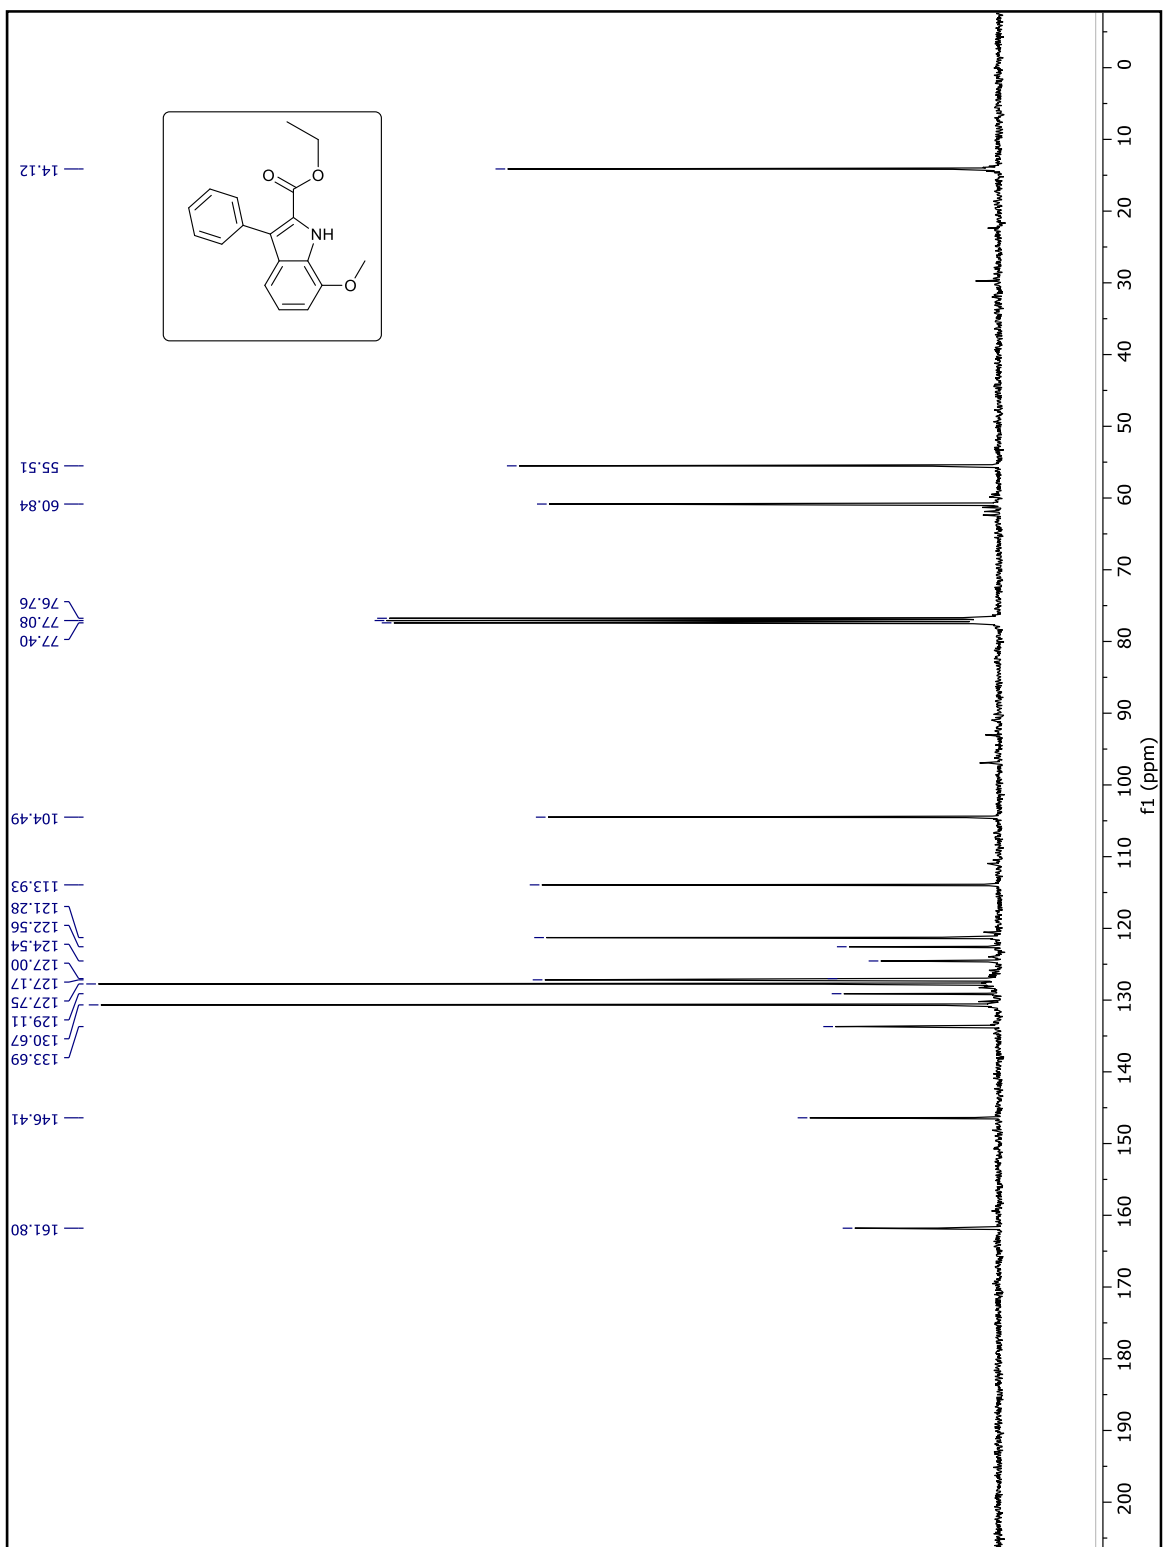



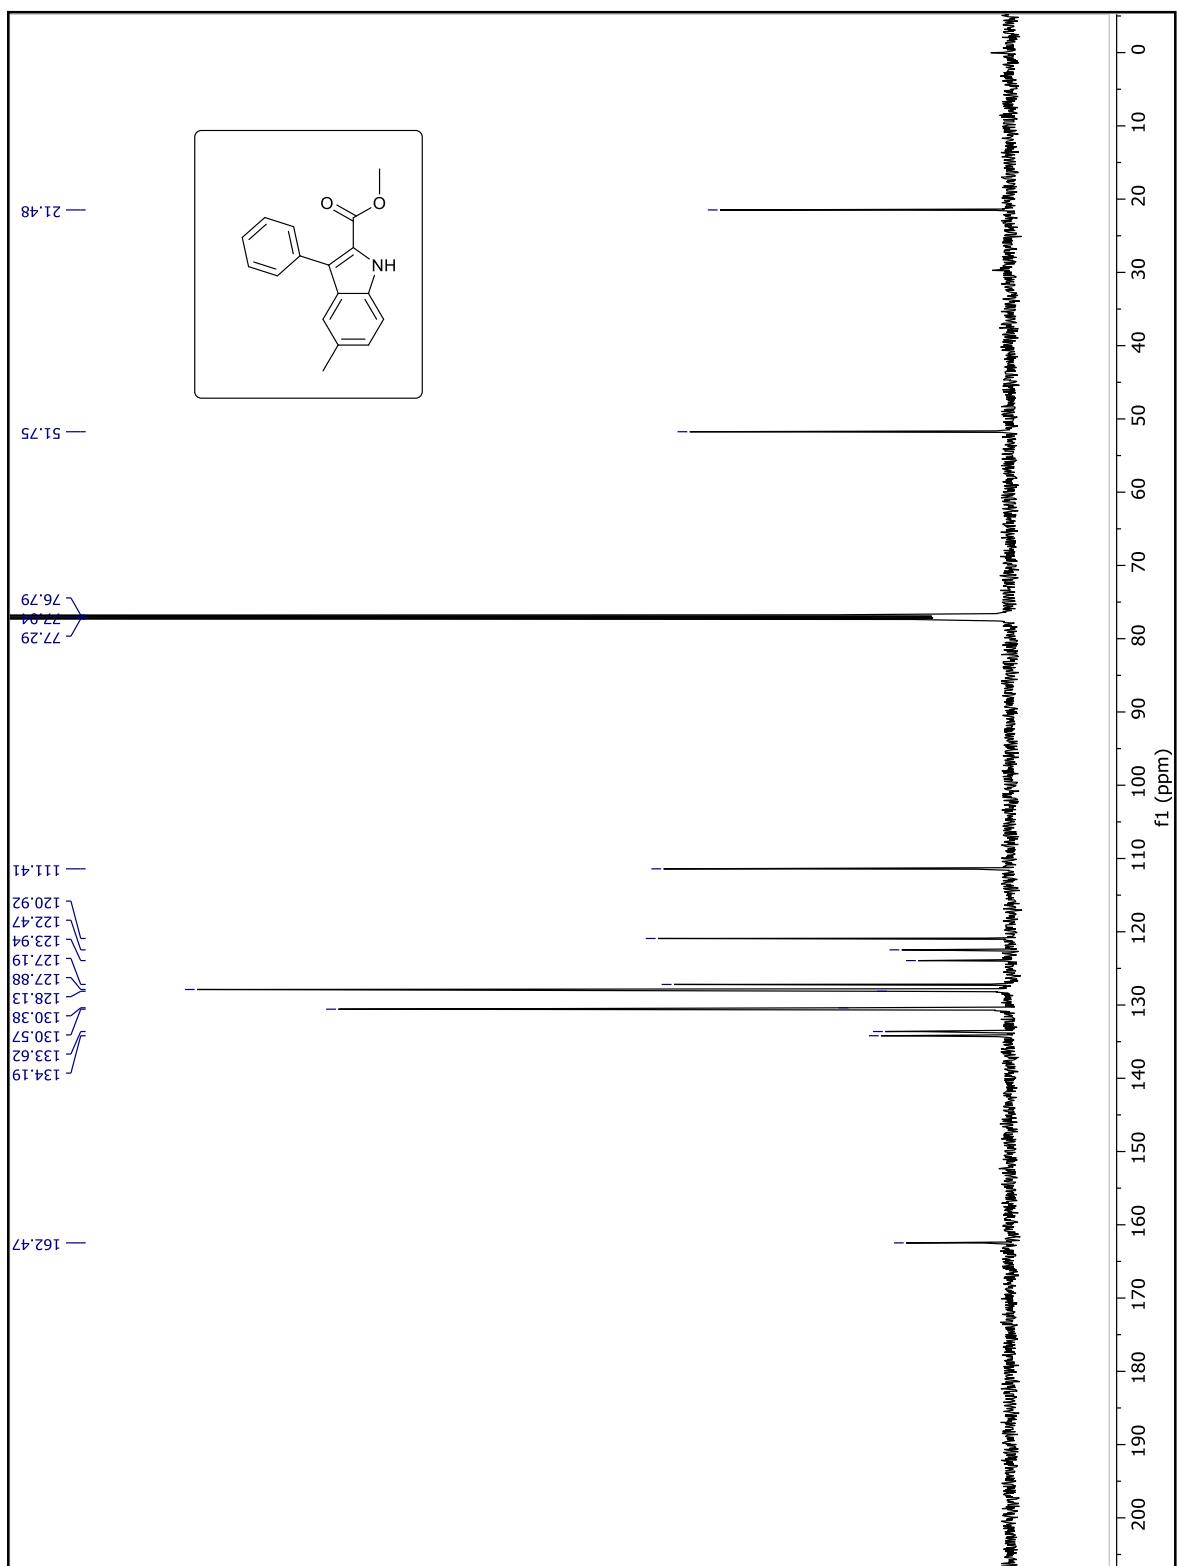

Ethyl 5-methyl-3-phenyl-1H-indole-2-carboxylate (Table 1, 3k)

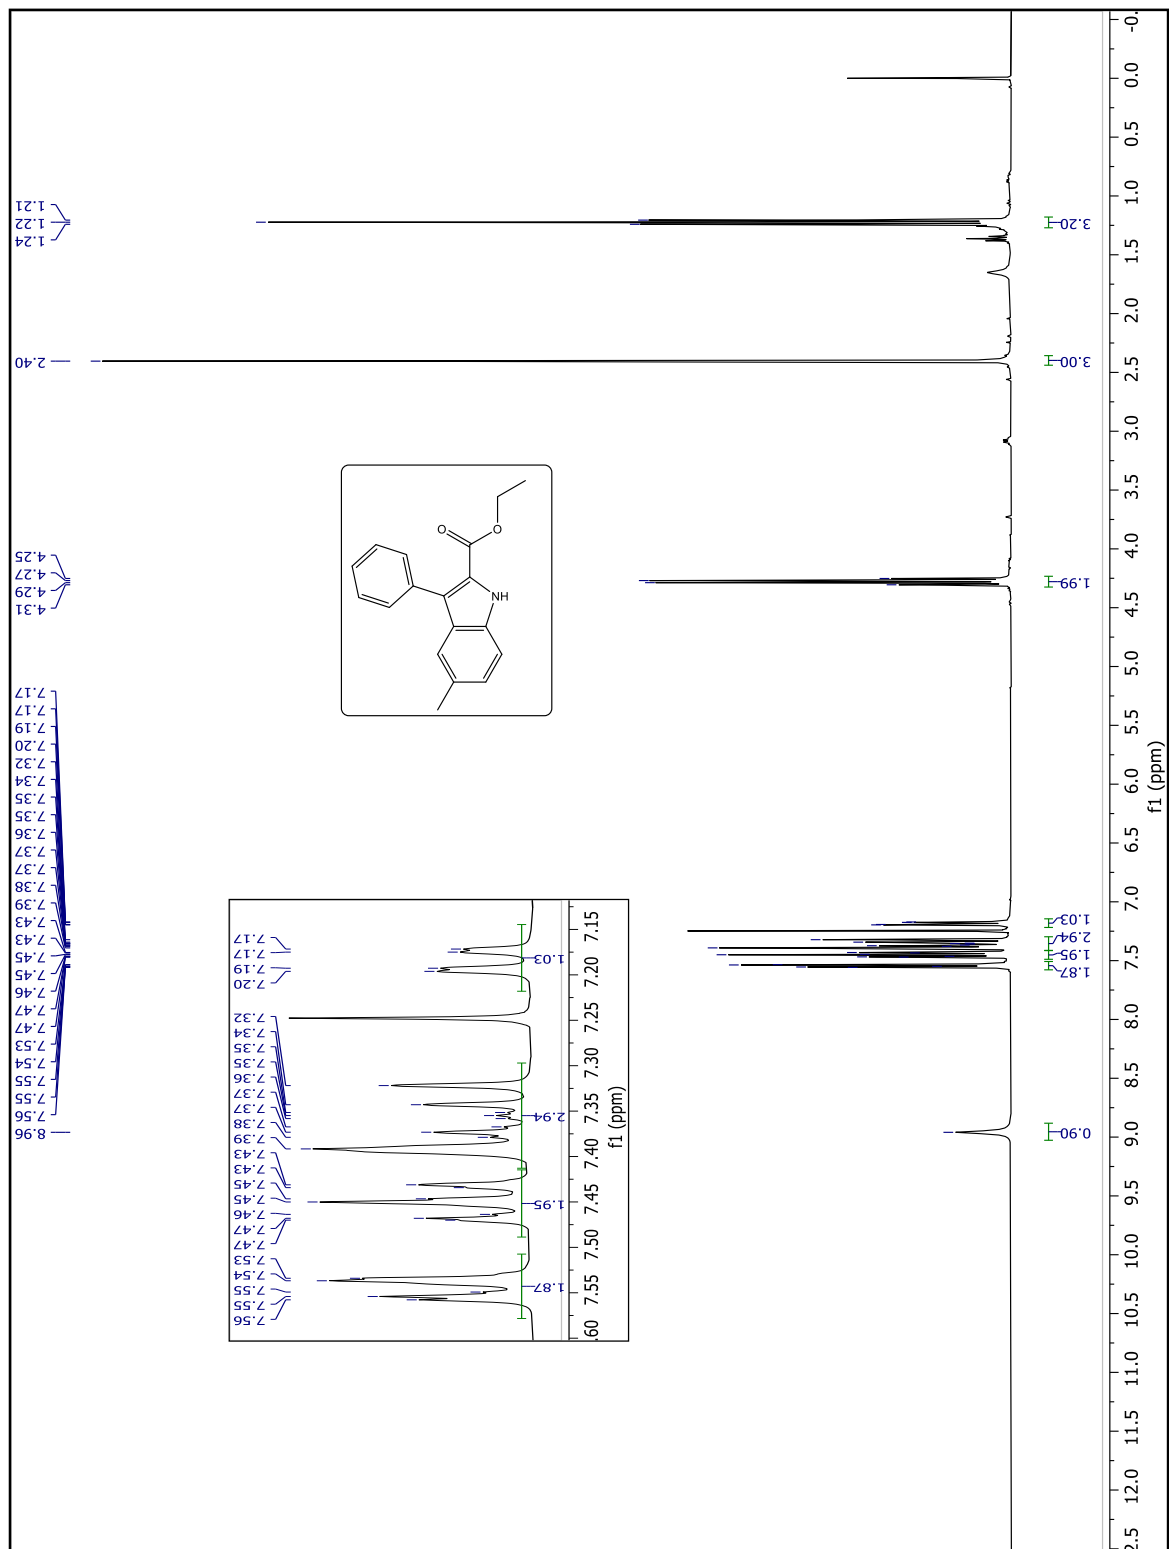

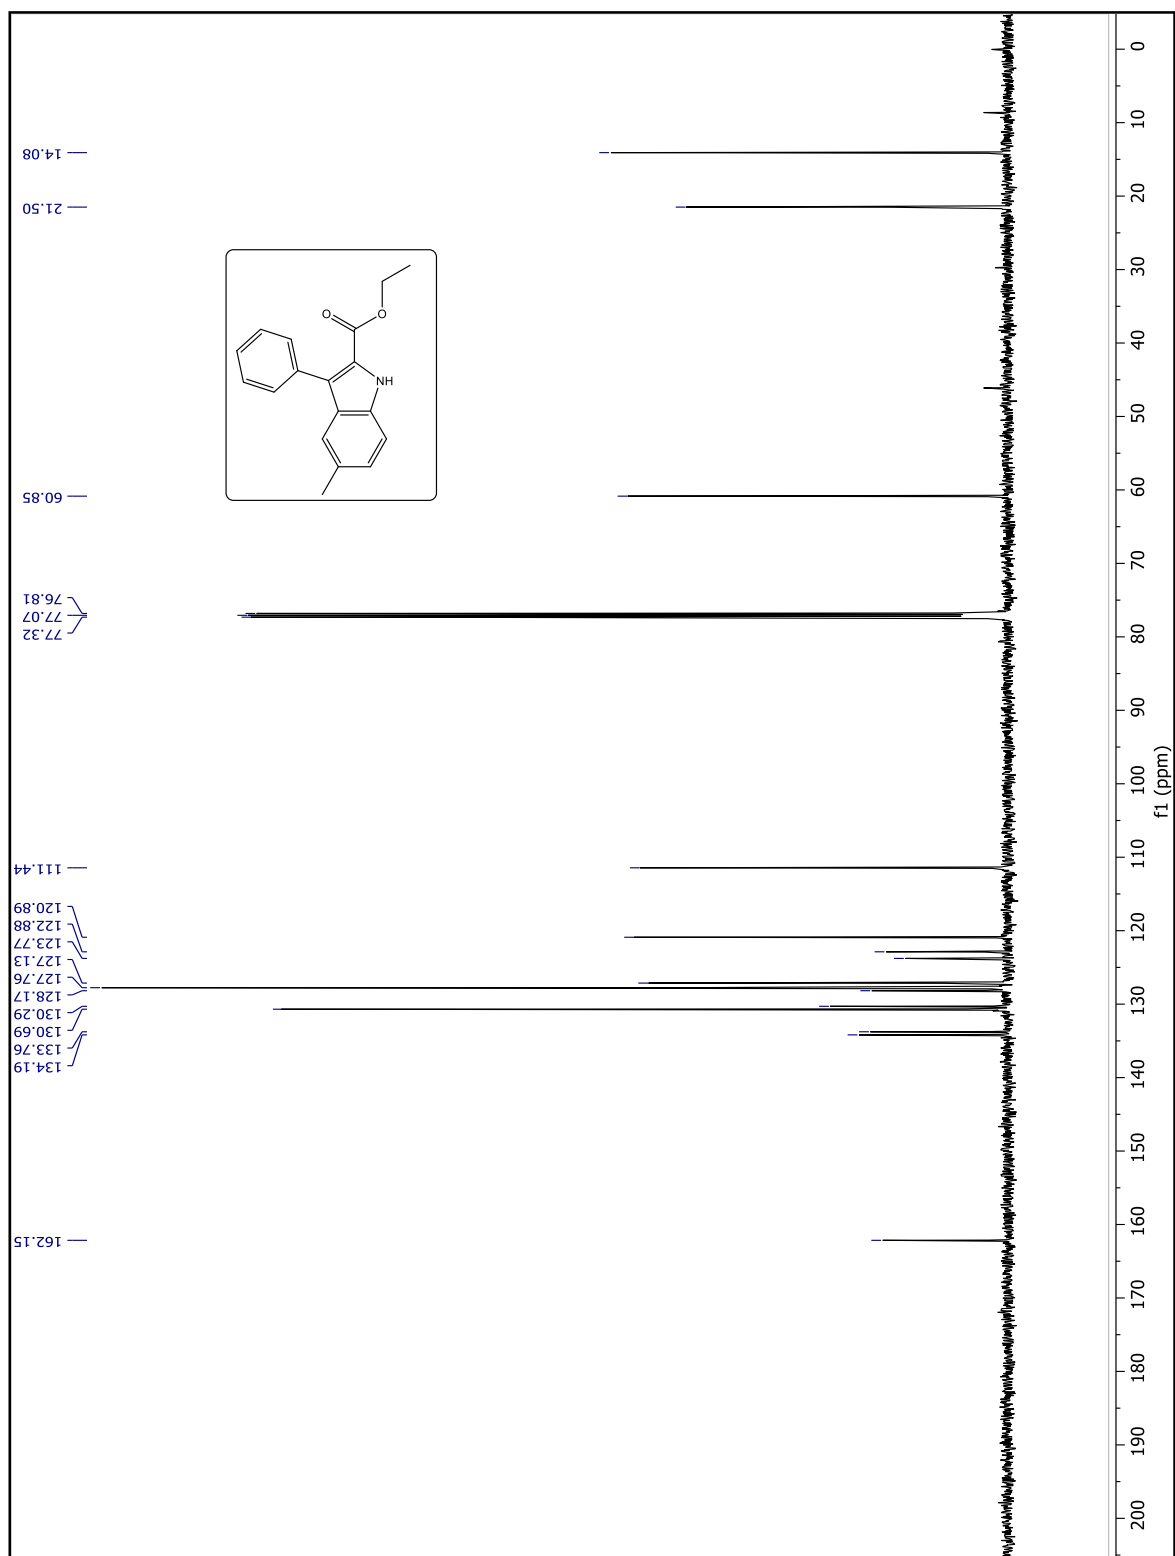



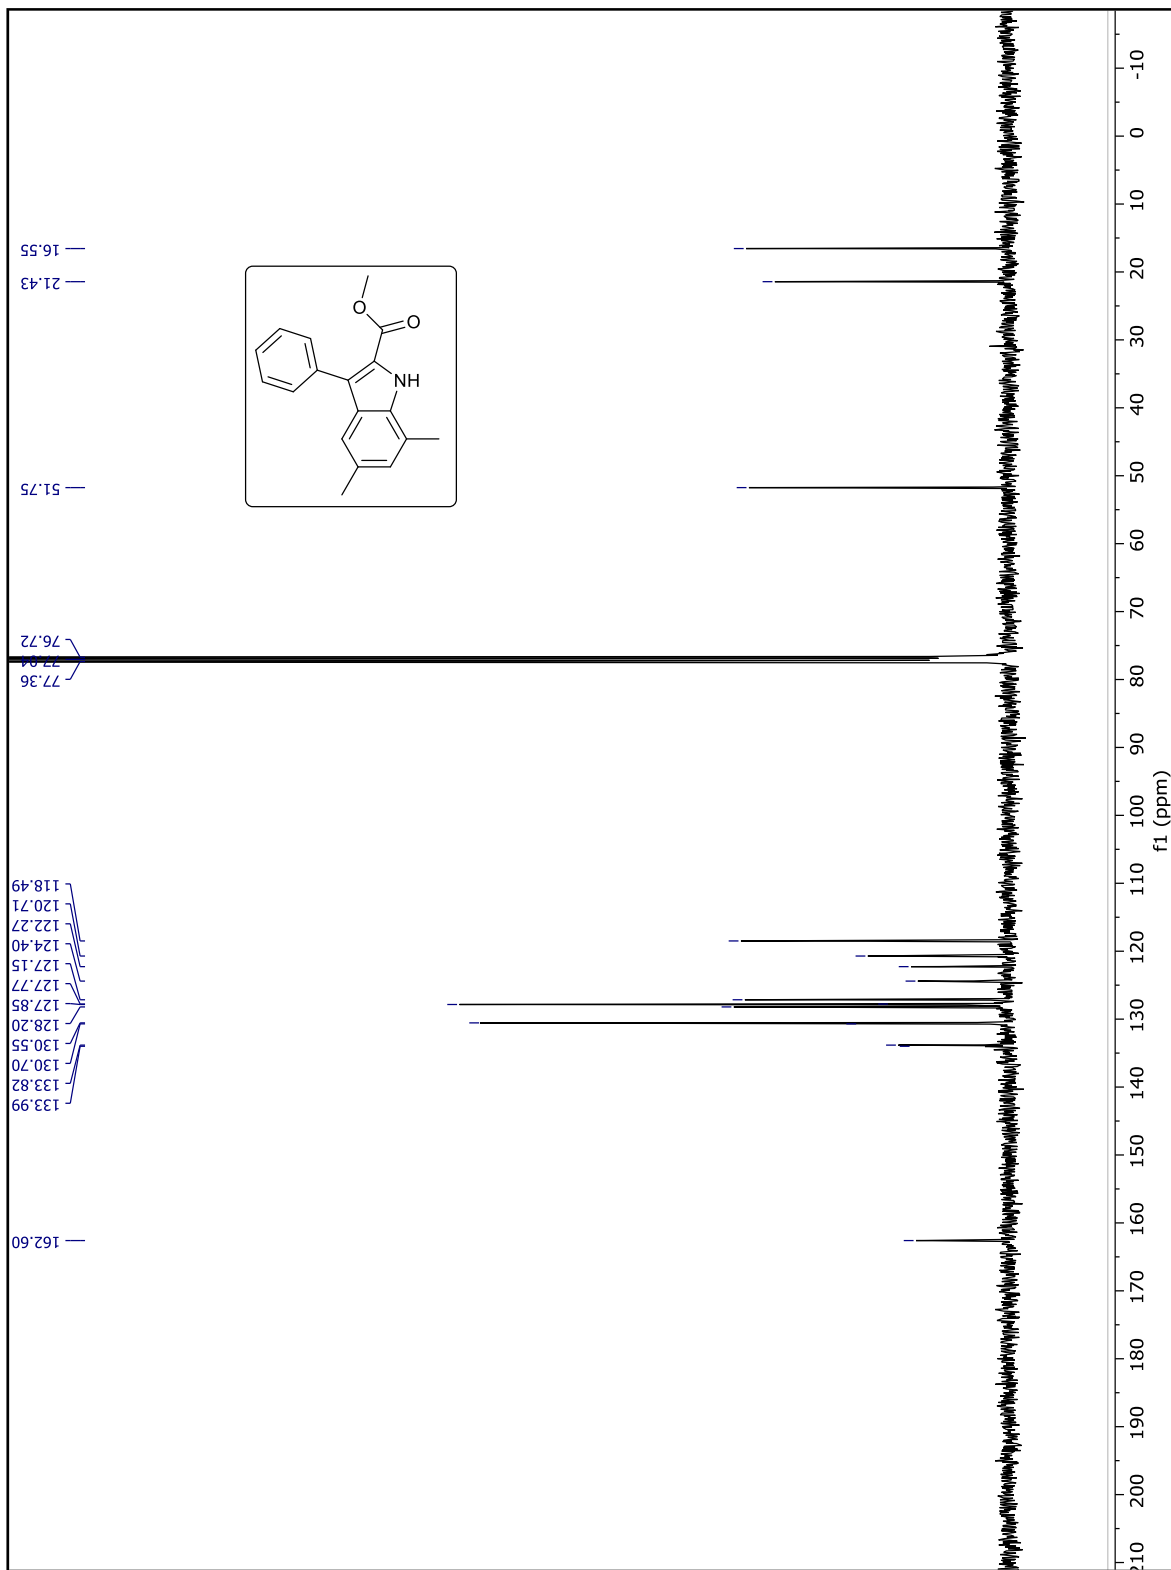

Ethyl 5,7-dimethyl-3-phenyl-1H-indole-2-carboxylate (Table 1, 3m)

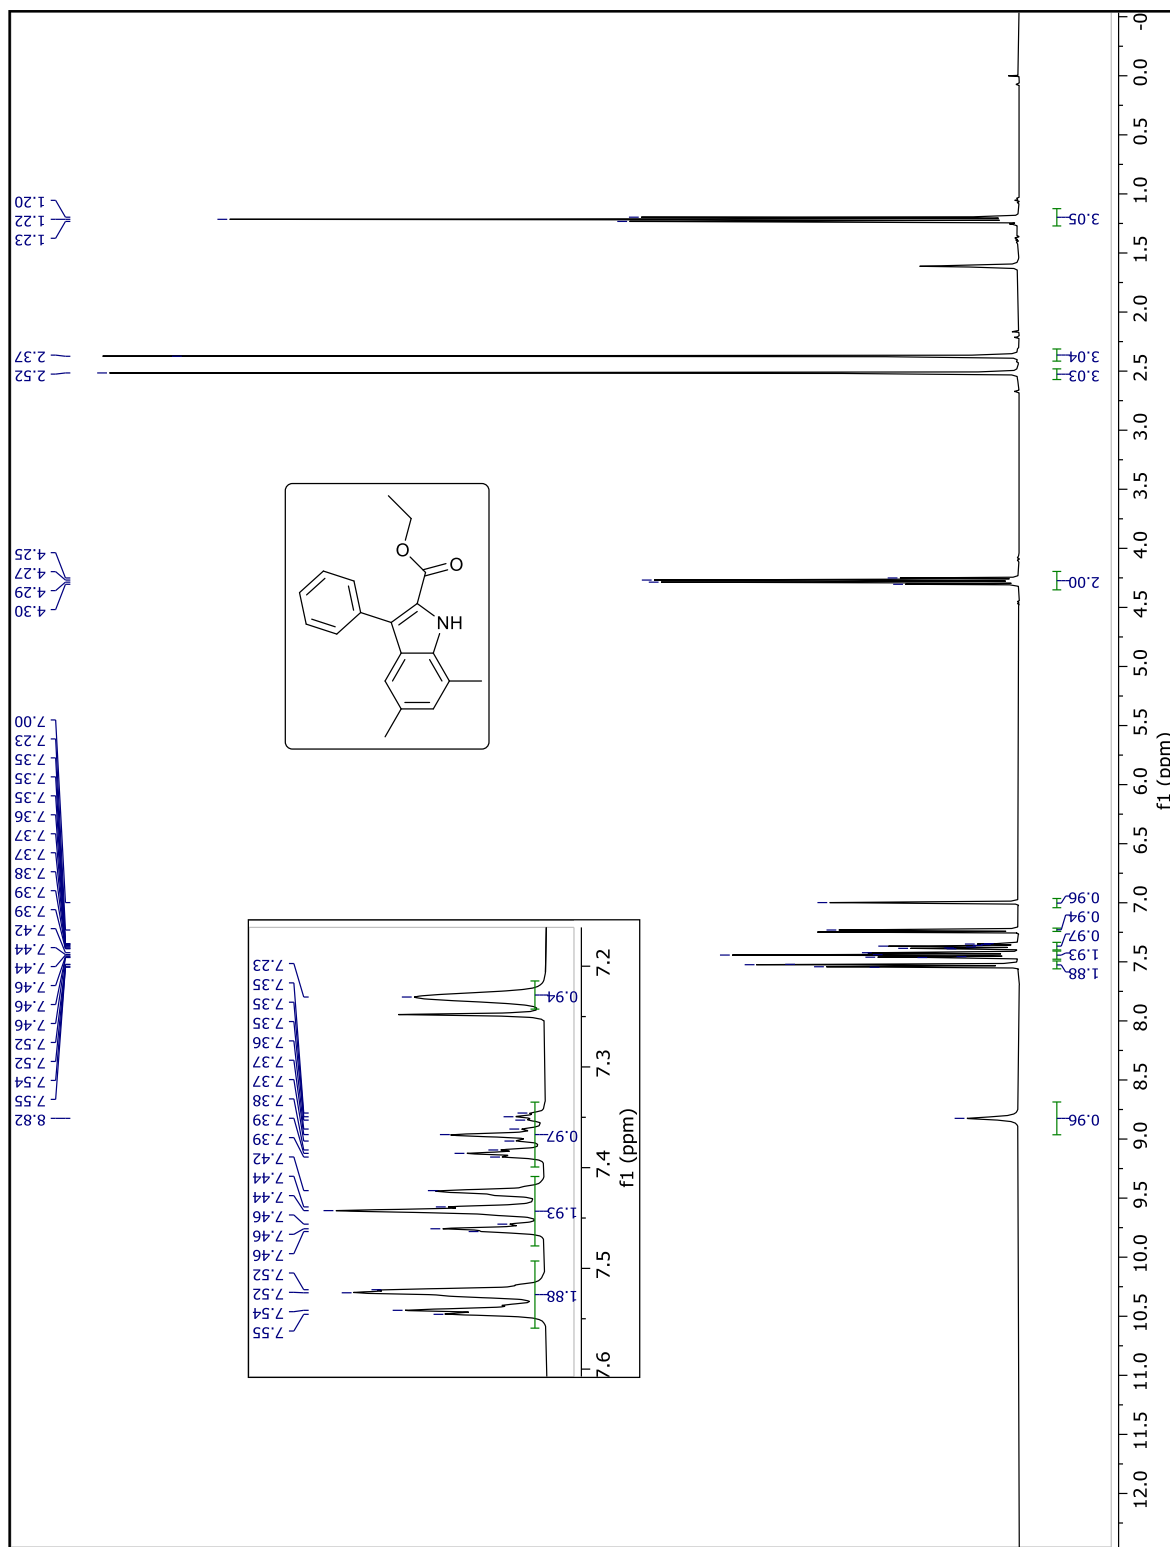

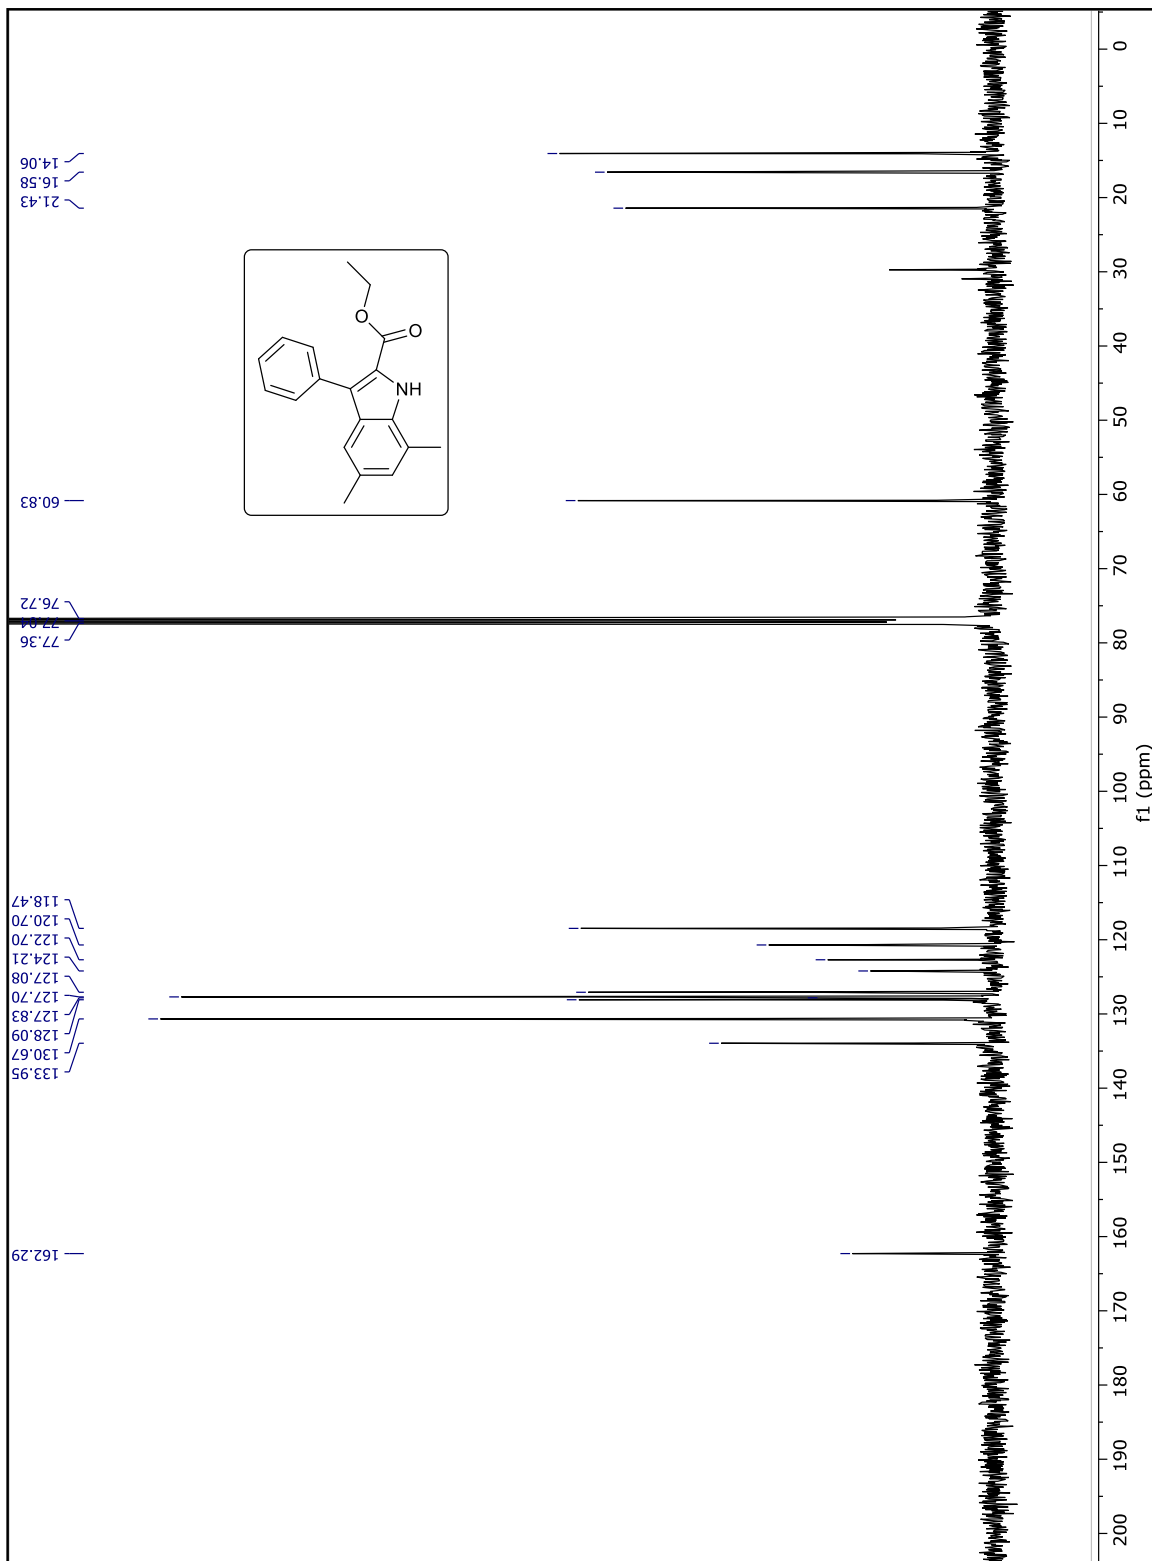

Methyl 5-chloro-3-phenyl-1H-indole-2-carboxylate (Table 1, 3n)

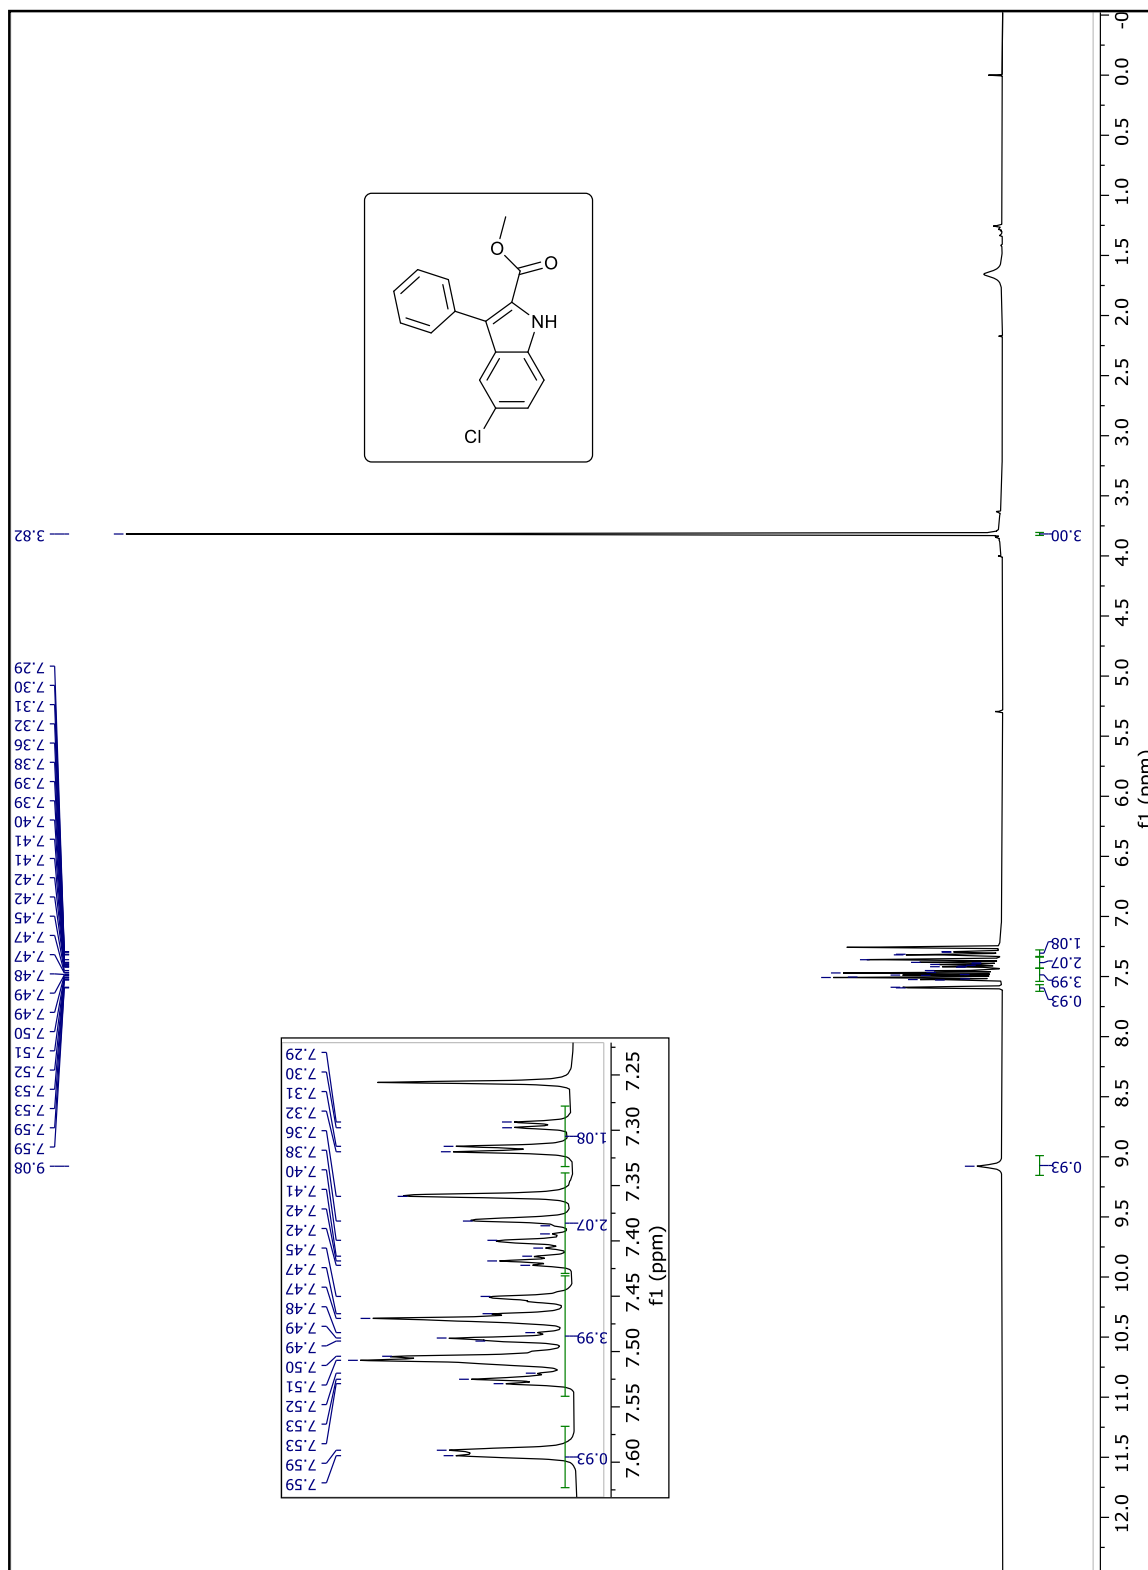

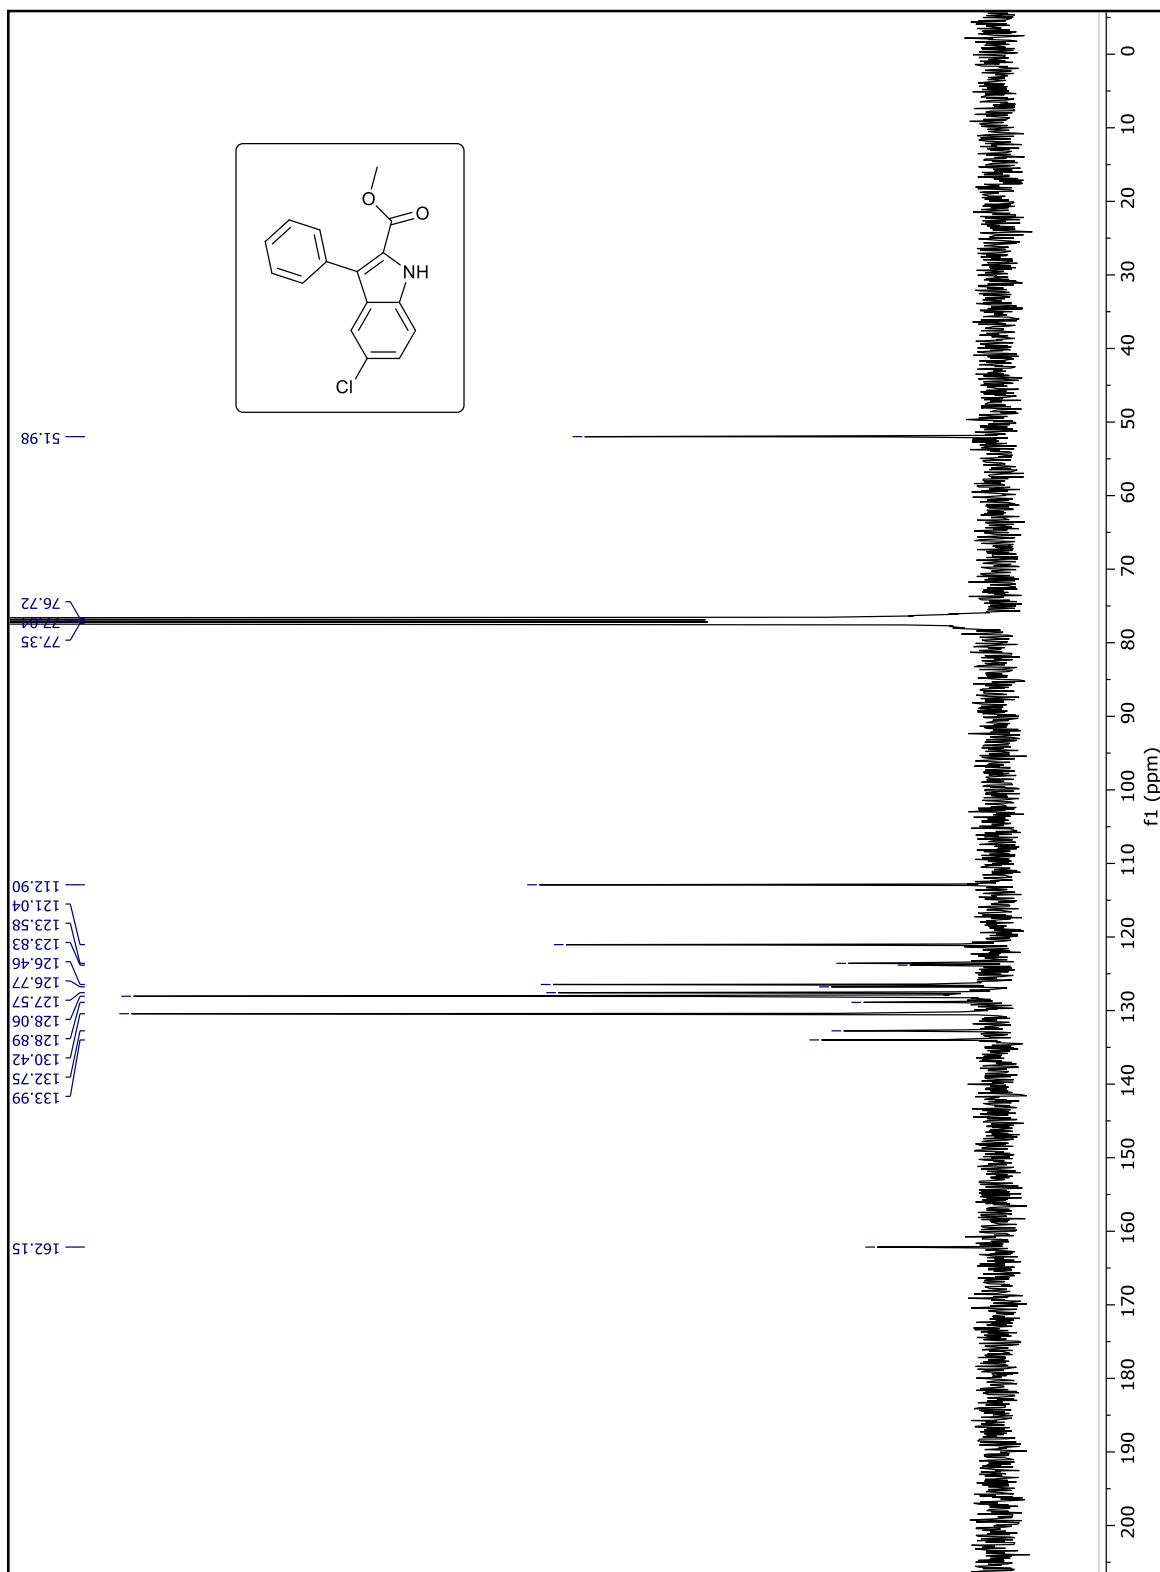

Ethyl 5-chloro-3-phenyl-1H-indole-2-carboxylate (Table 1, 3o)

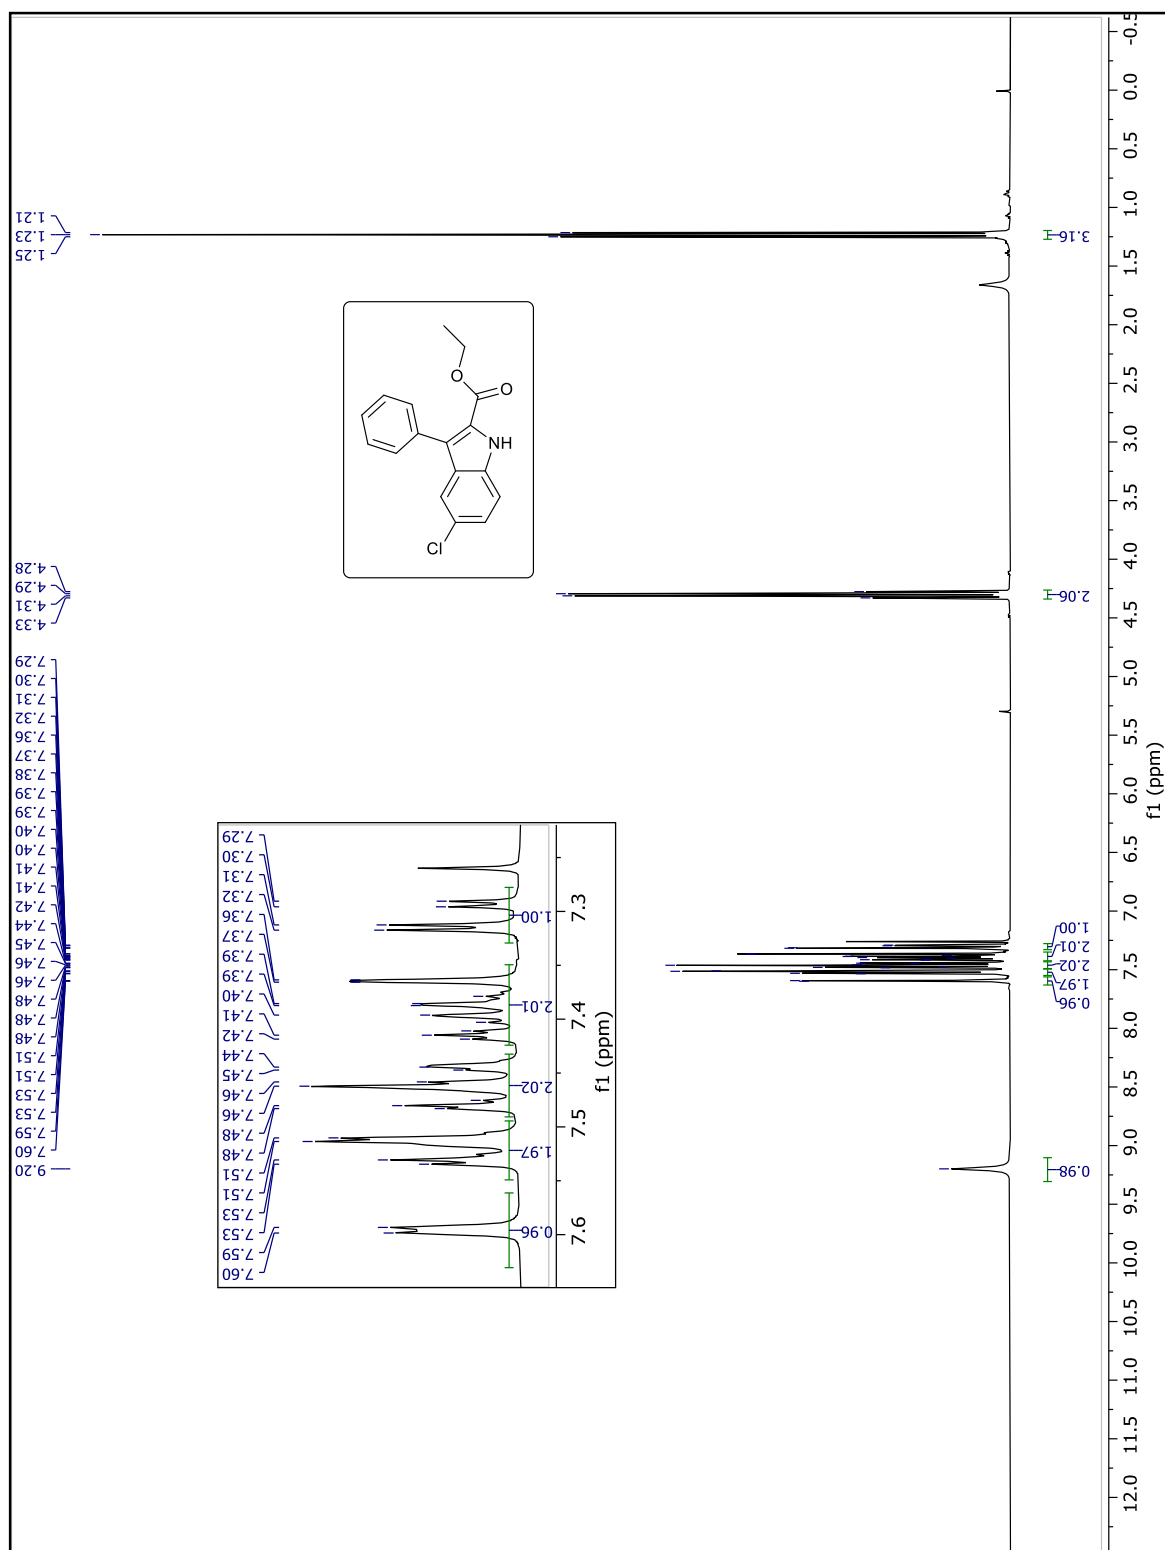

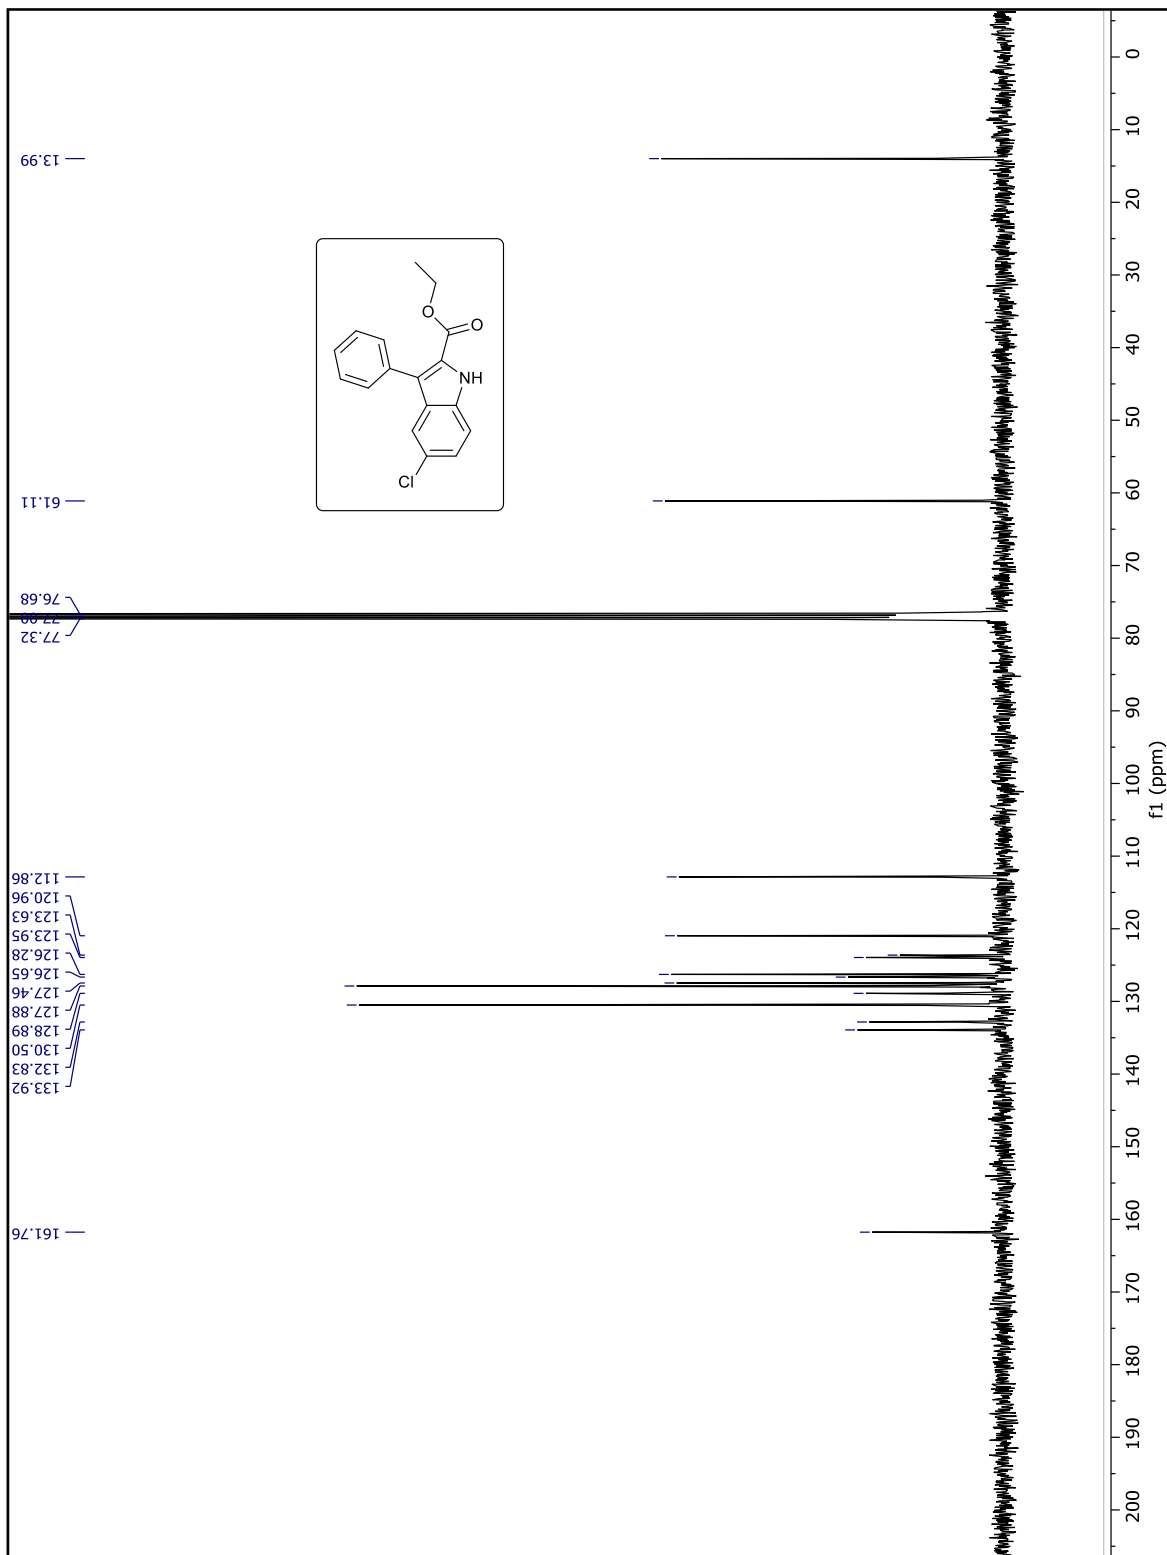

Methyl 5-bromo-3-phenyl-1H-indole-2-carboxylate (Table 1, 3p)

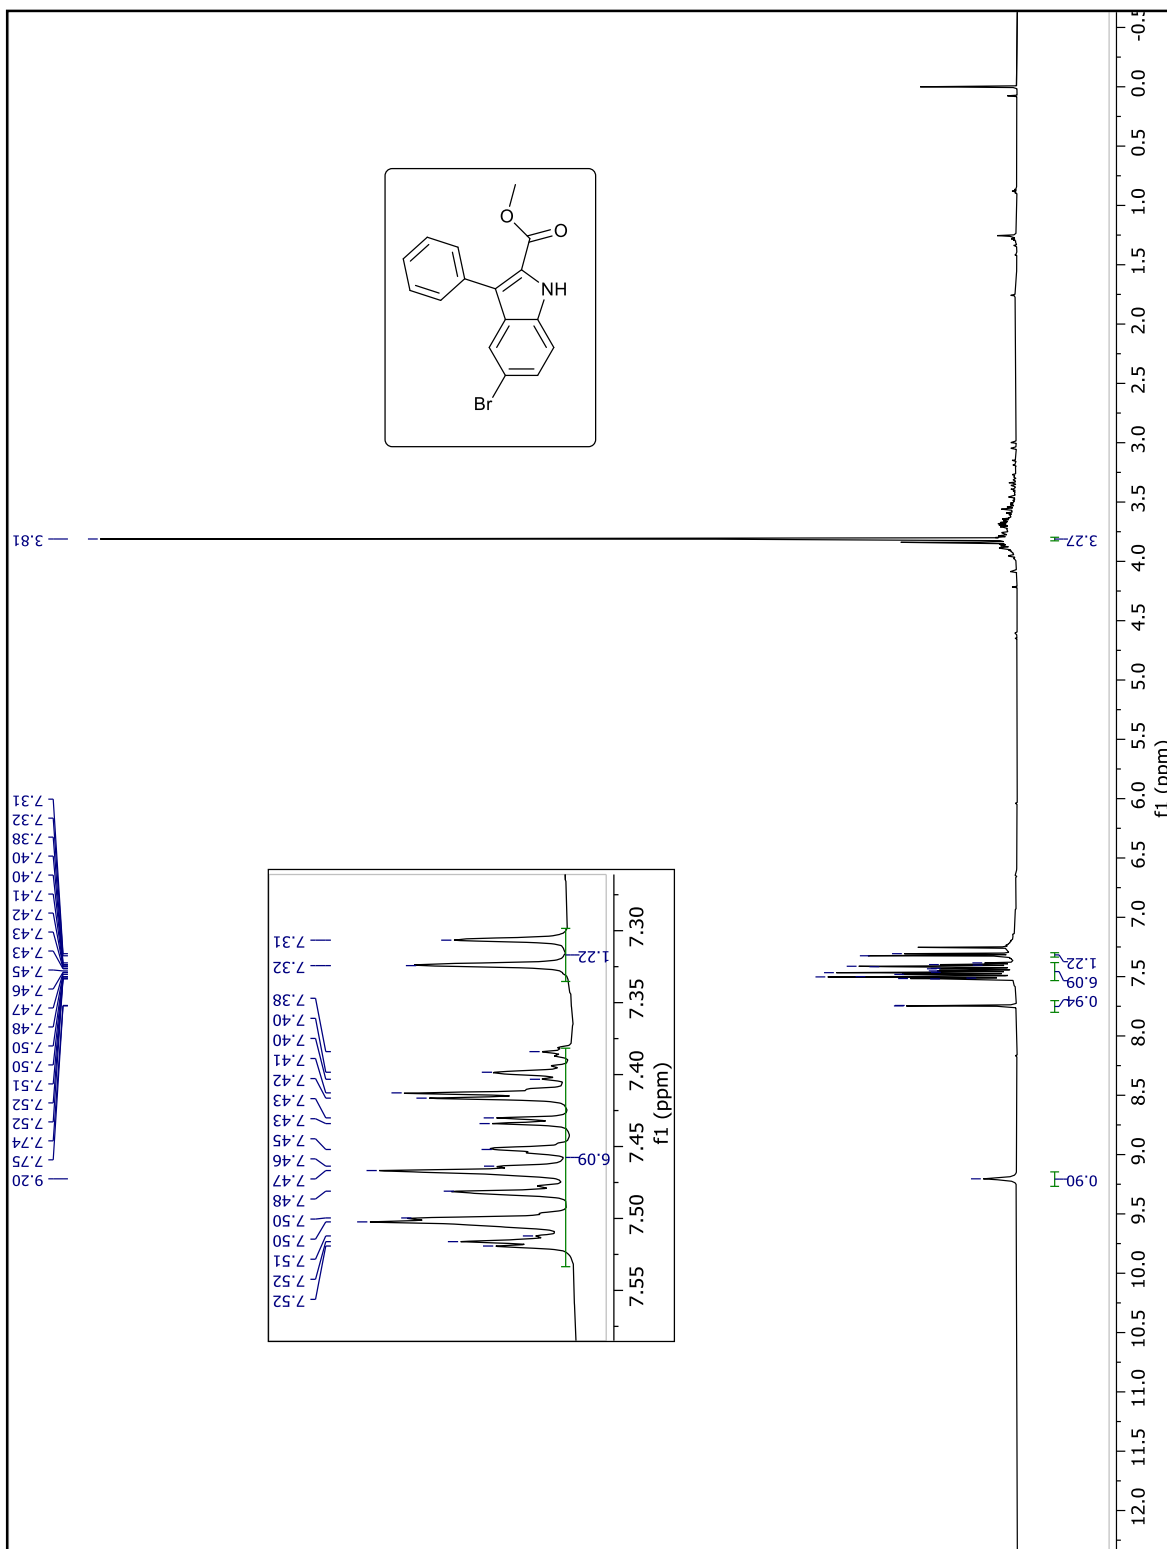

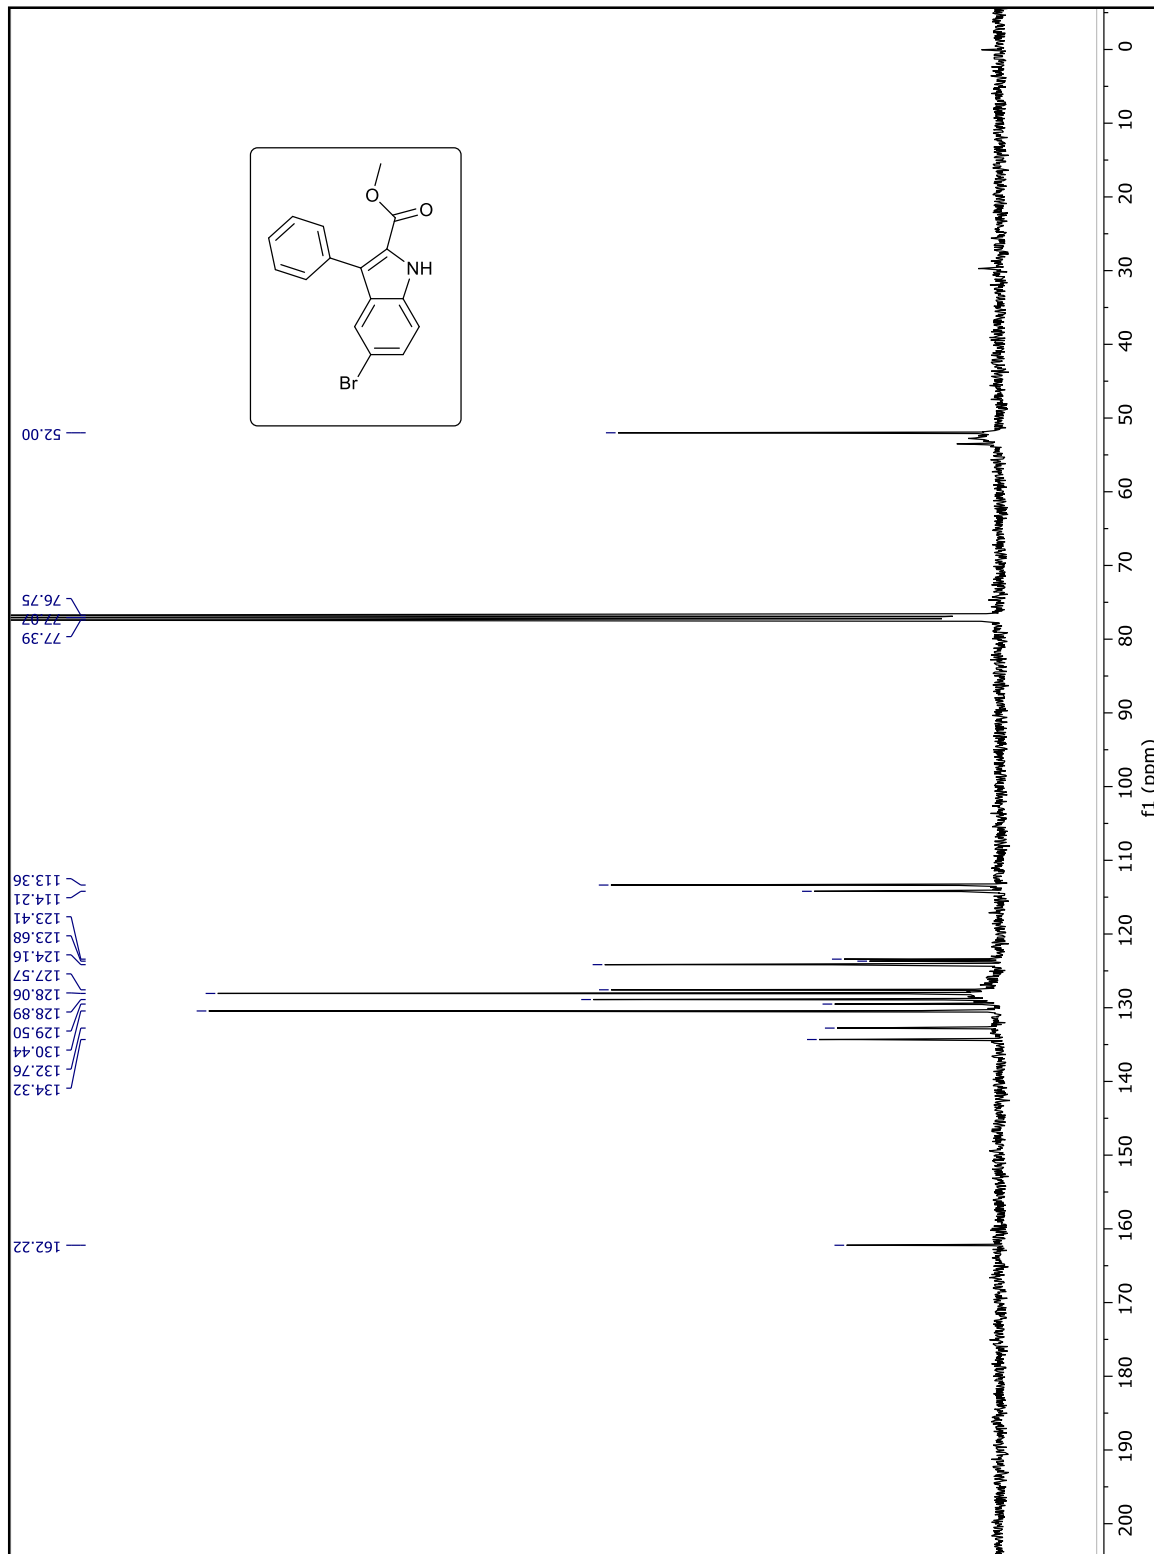

# Ethyl 5-bromo-3-phenyl-1H-indole-2-carboxylate (Table 1, 3q)

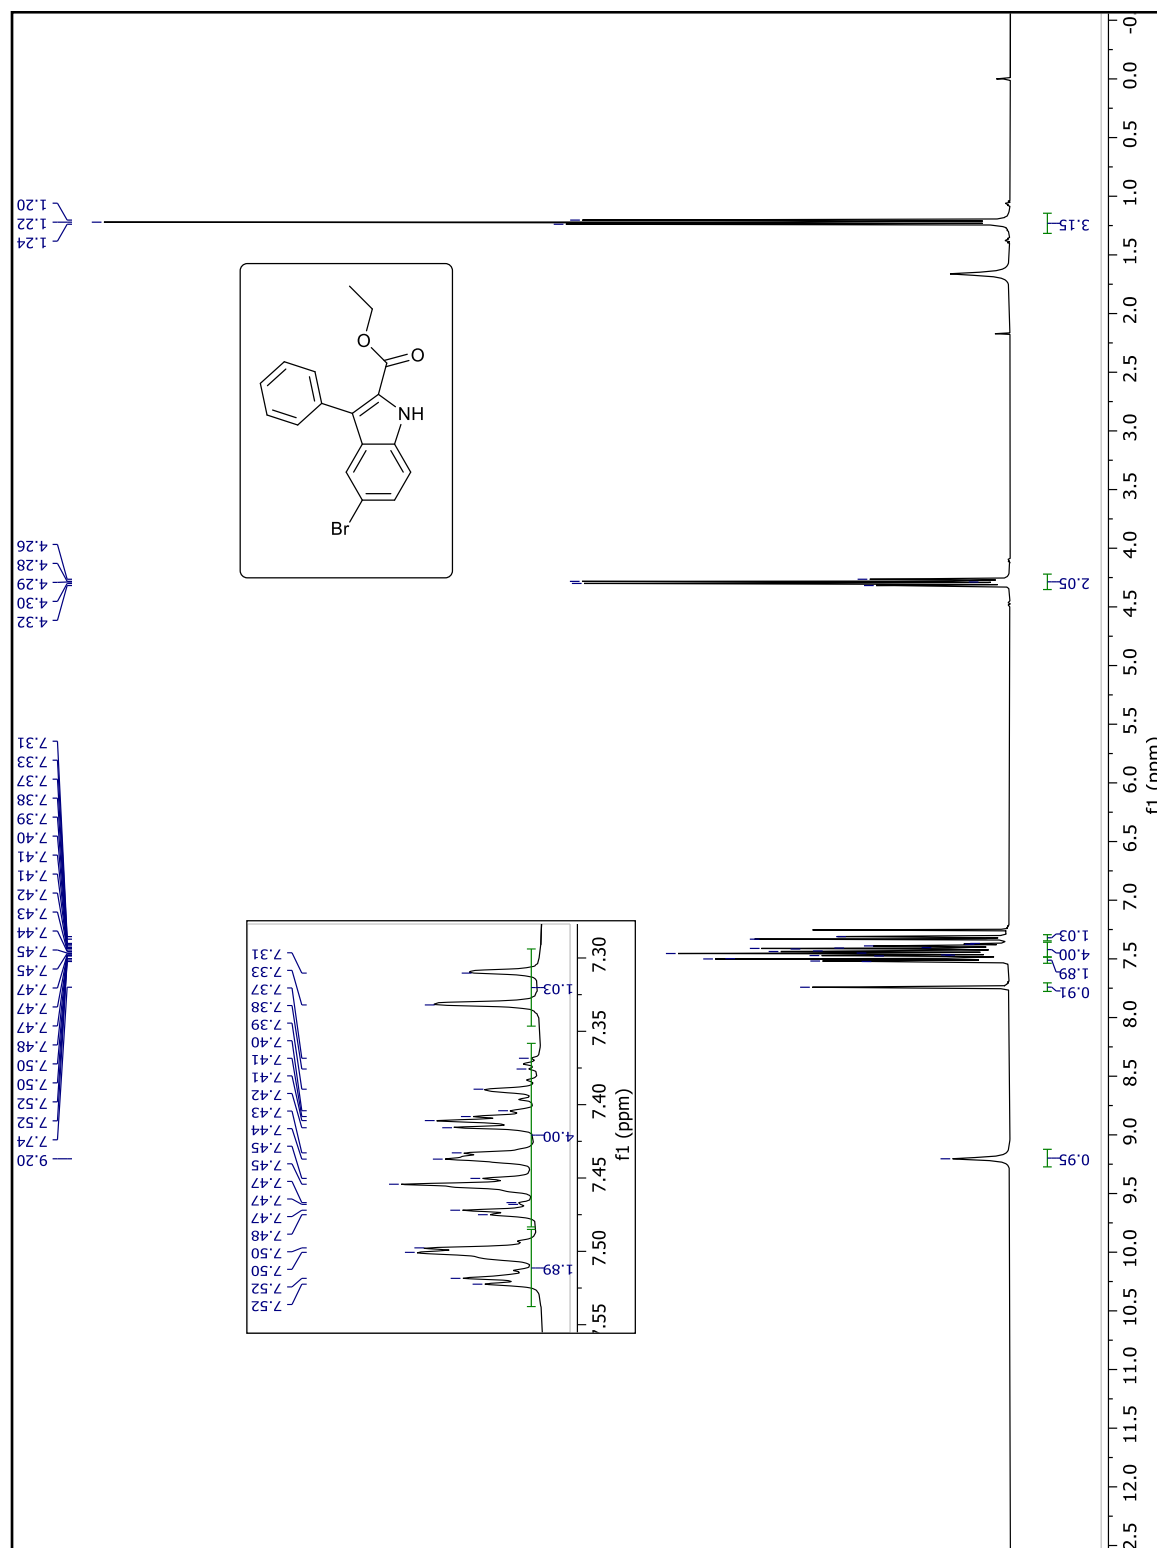

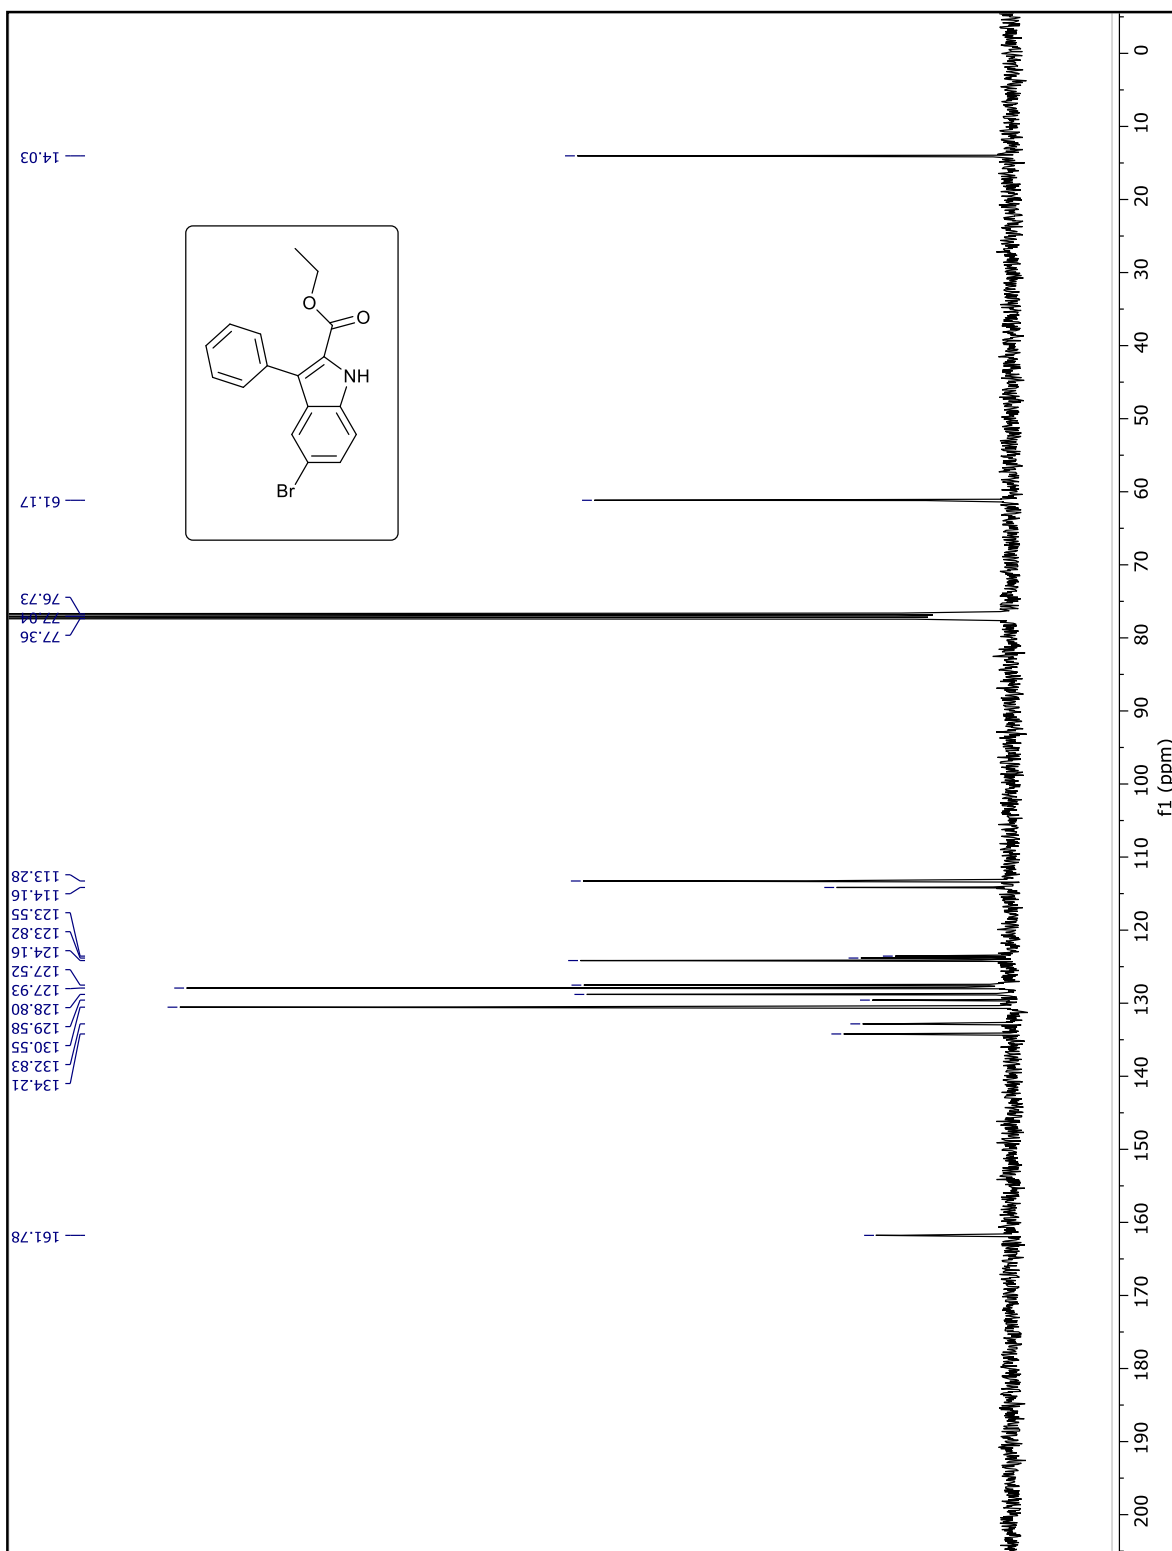

Methyl 5-fluoro-3-phenyl-1H-indole-2-carboxylate (Table 1, 3r)

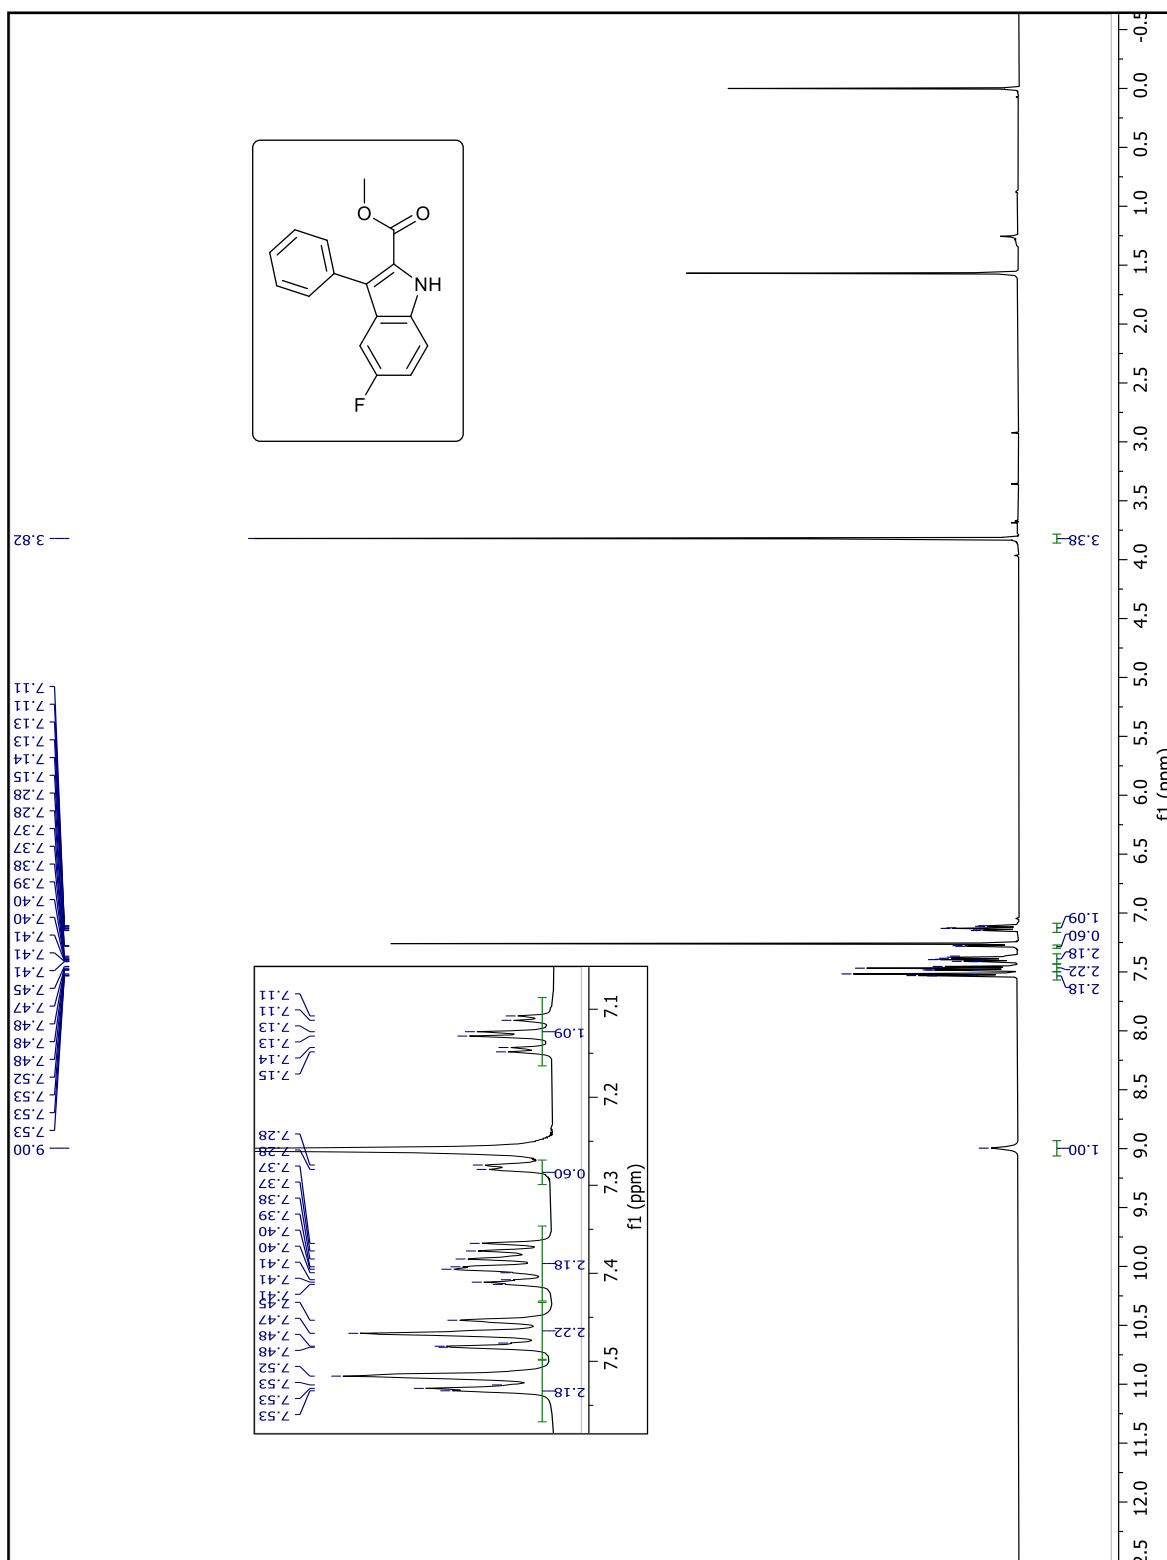

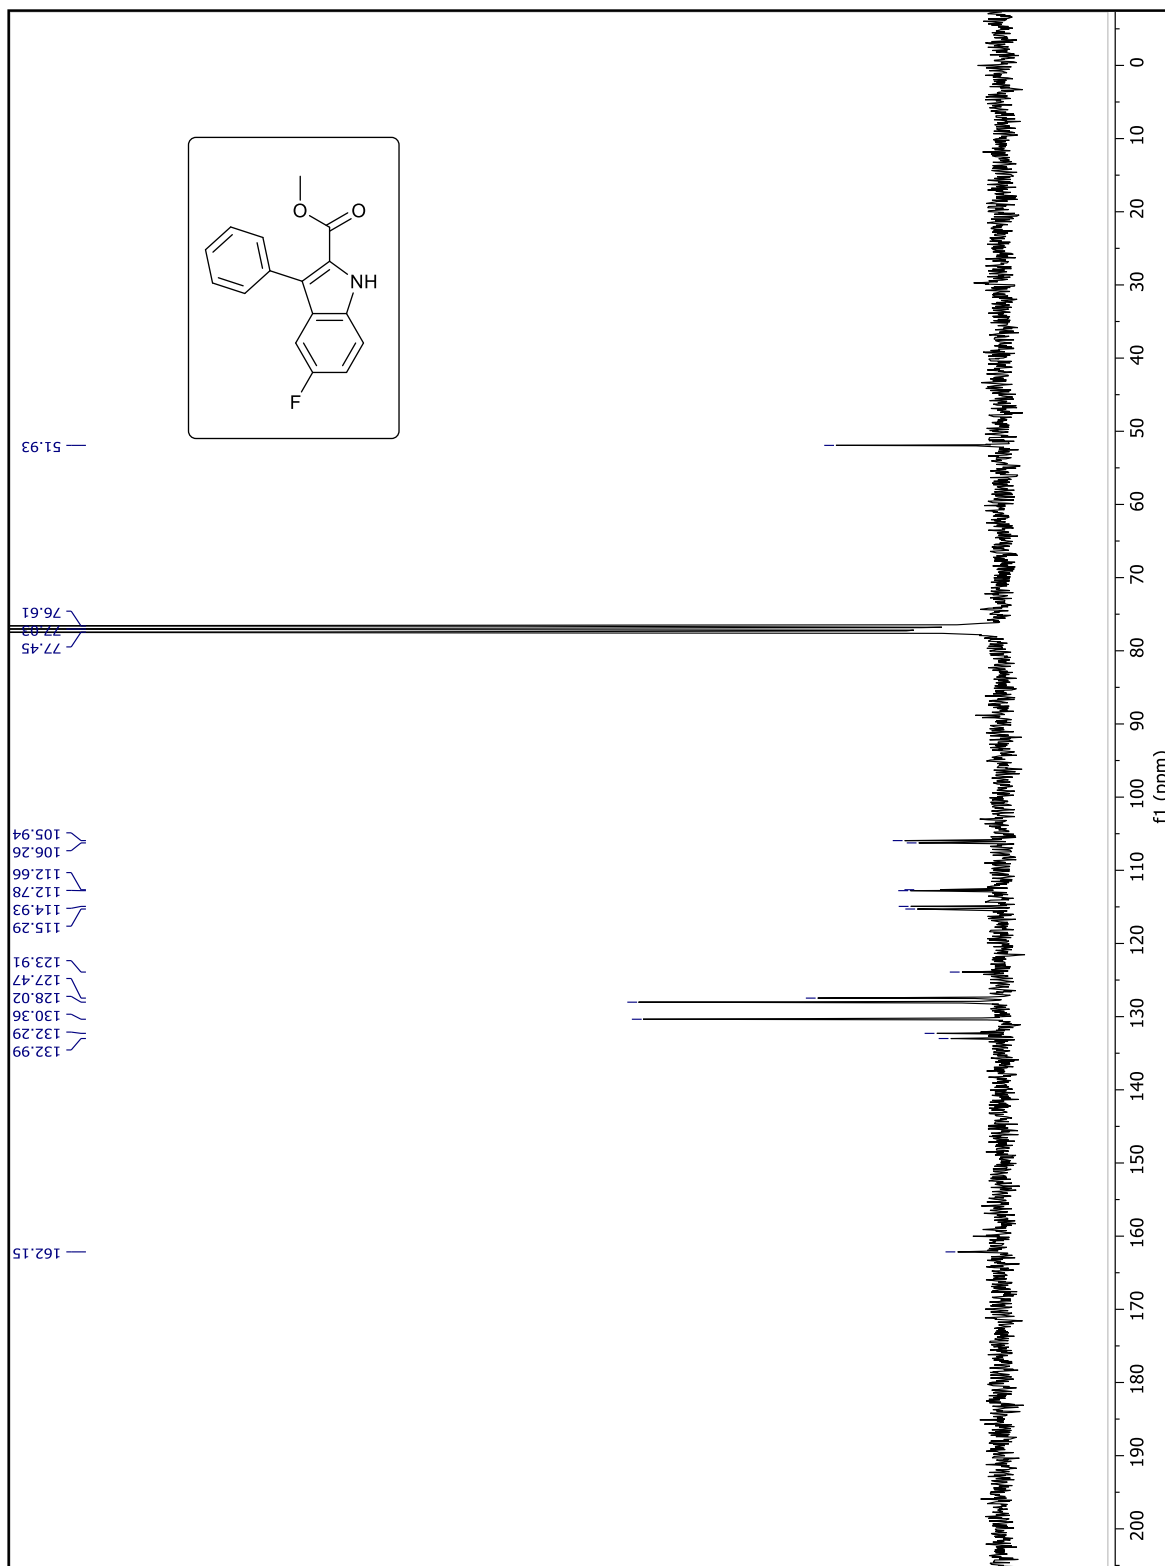

# Dimethyl 3-phenyl-1H-indole-2,5-dicarboxylate (Table 1, 3s)

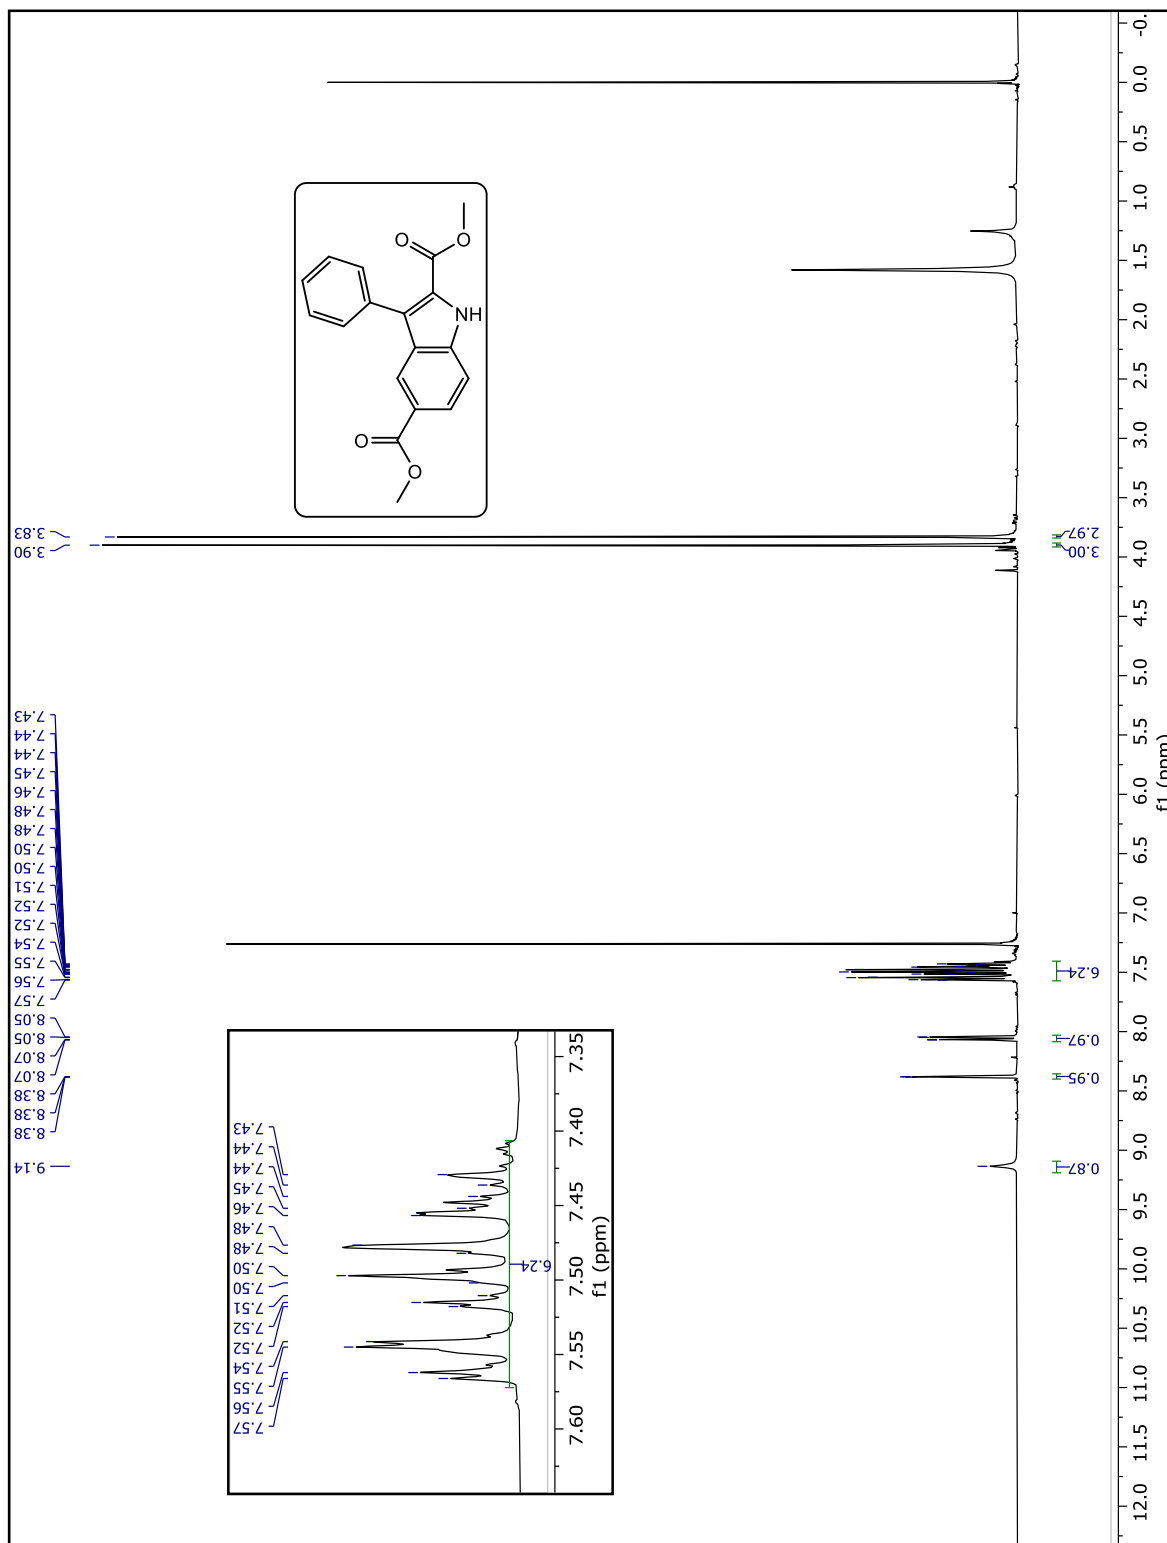

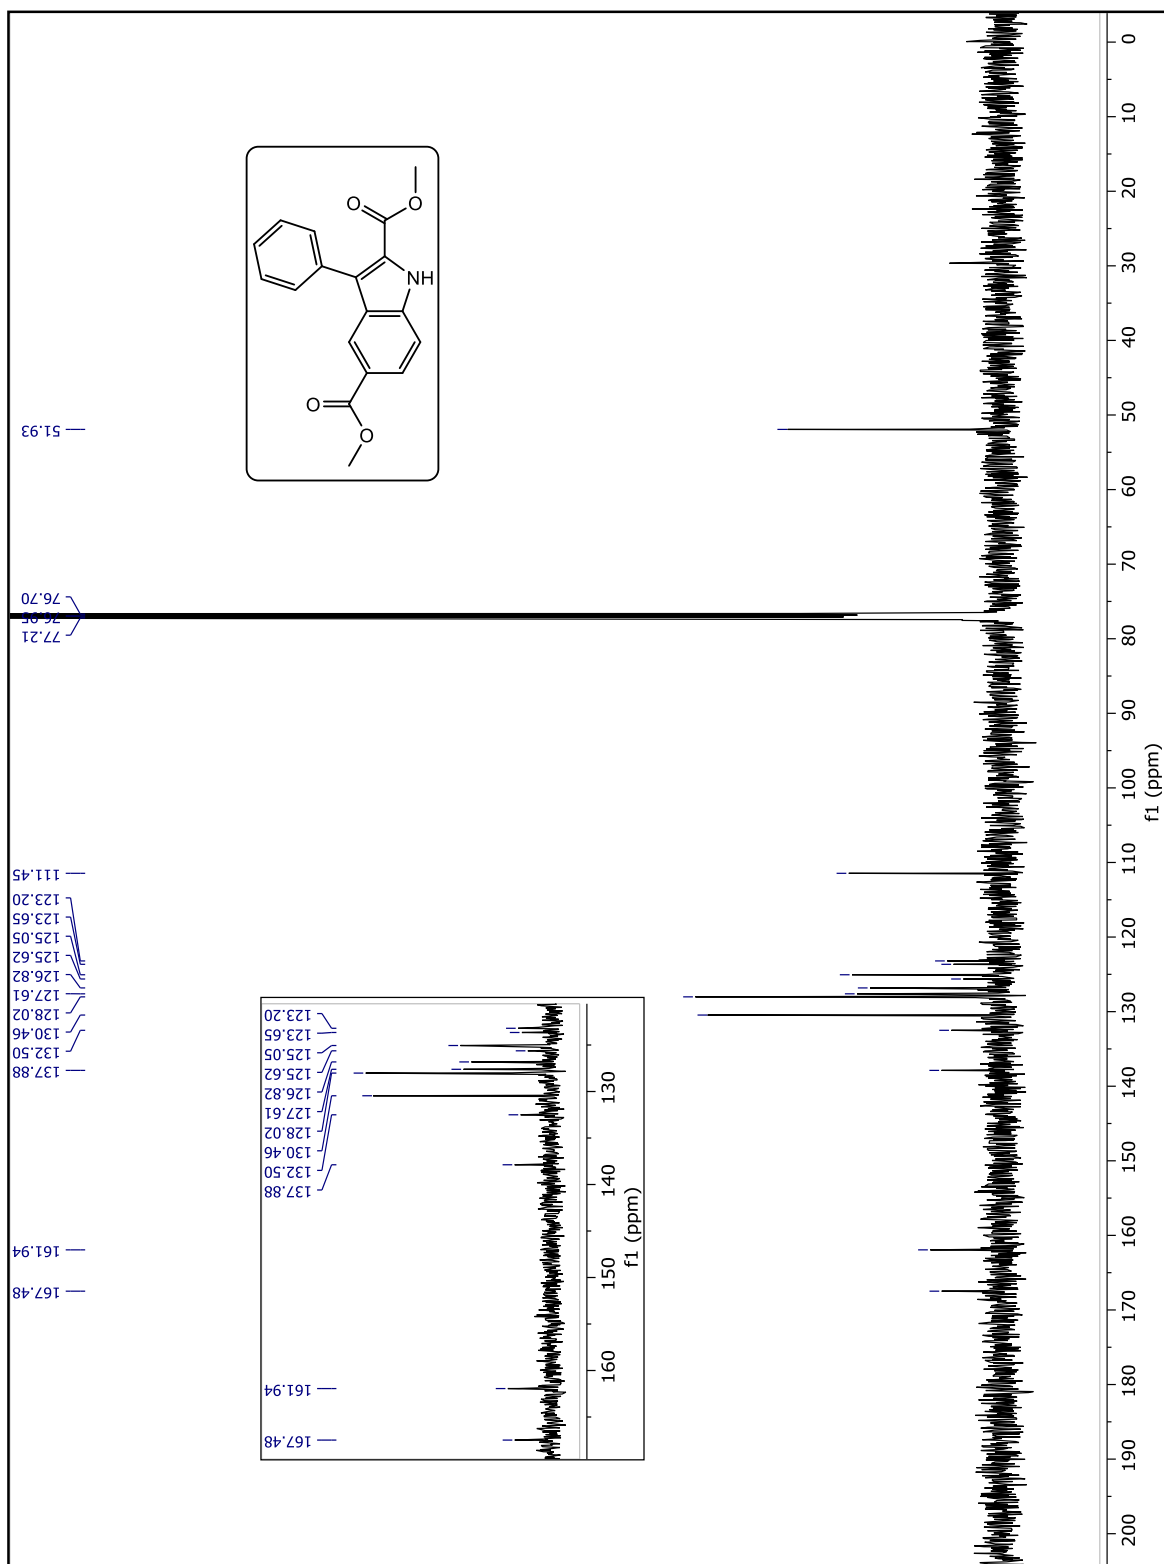

## 2-Ethyl 5-methyl 3-phenyl-1H-indole-2,5-dicarboxylate (Table 1, 3t)

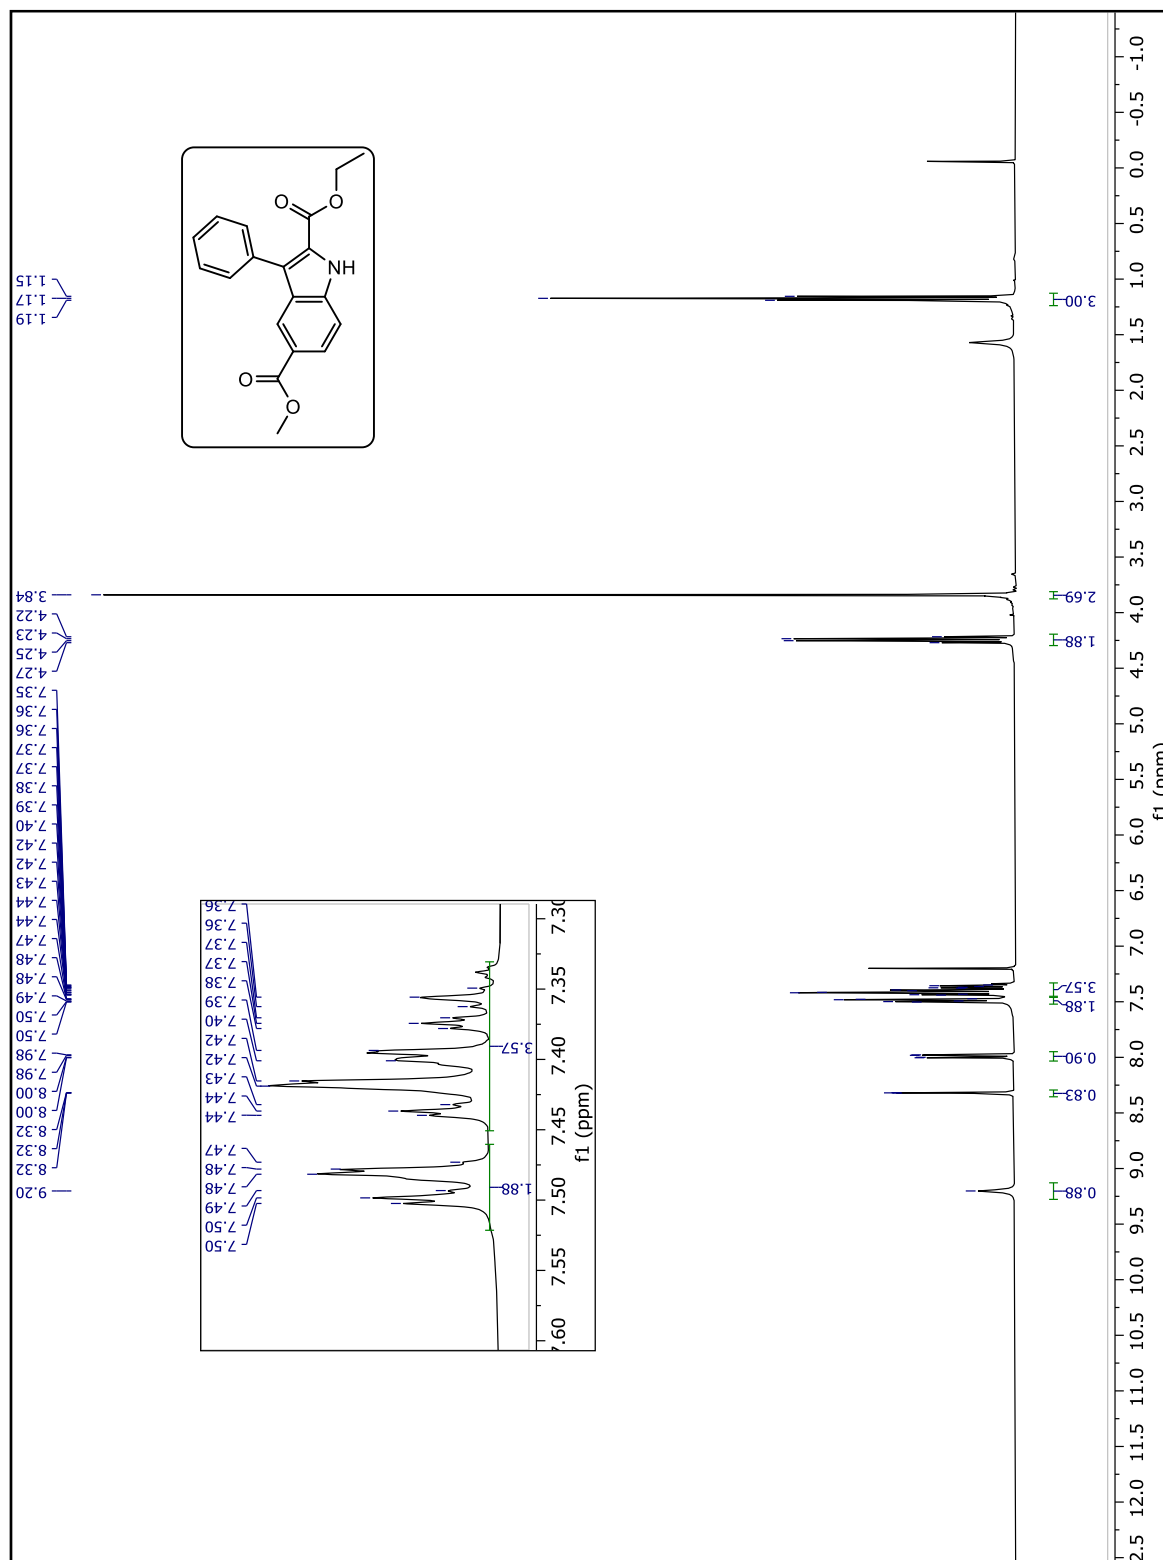

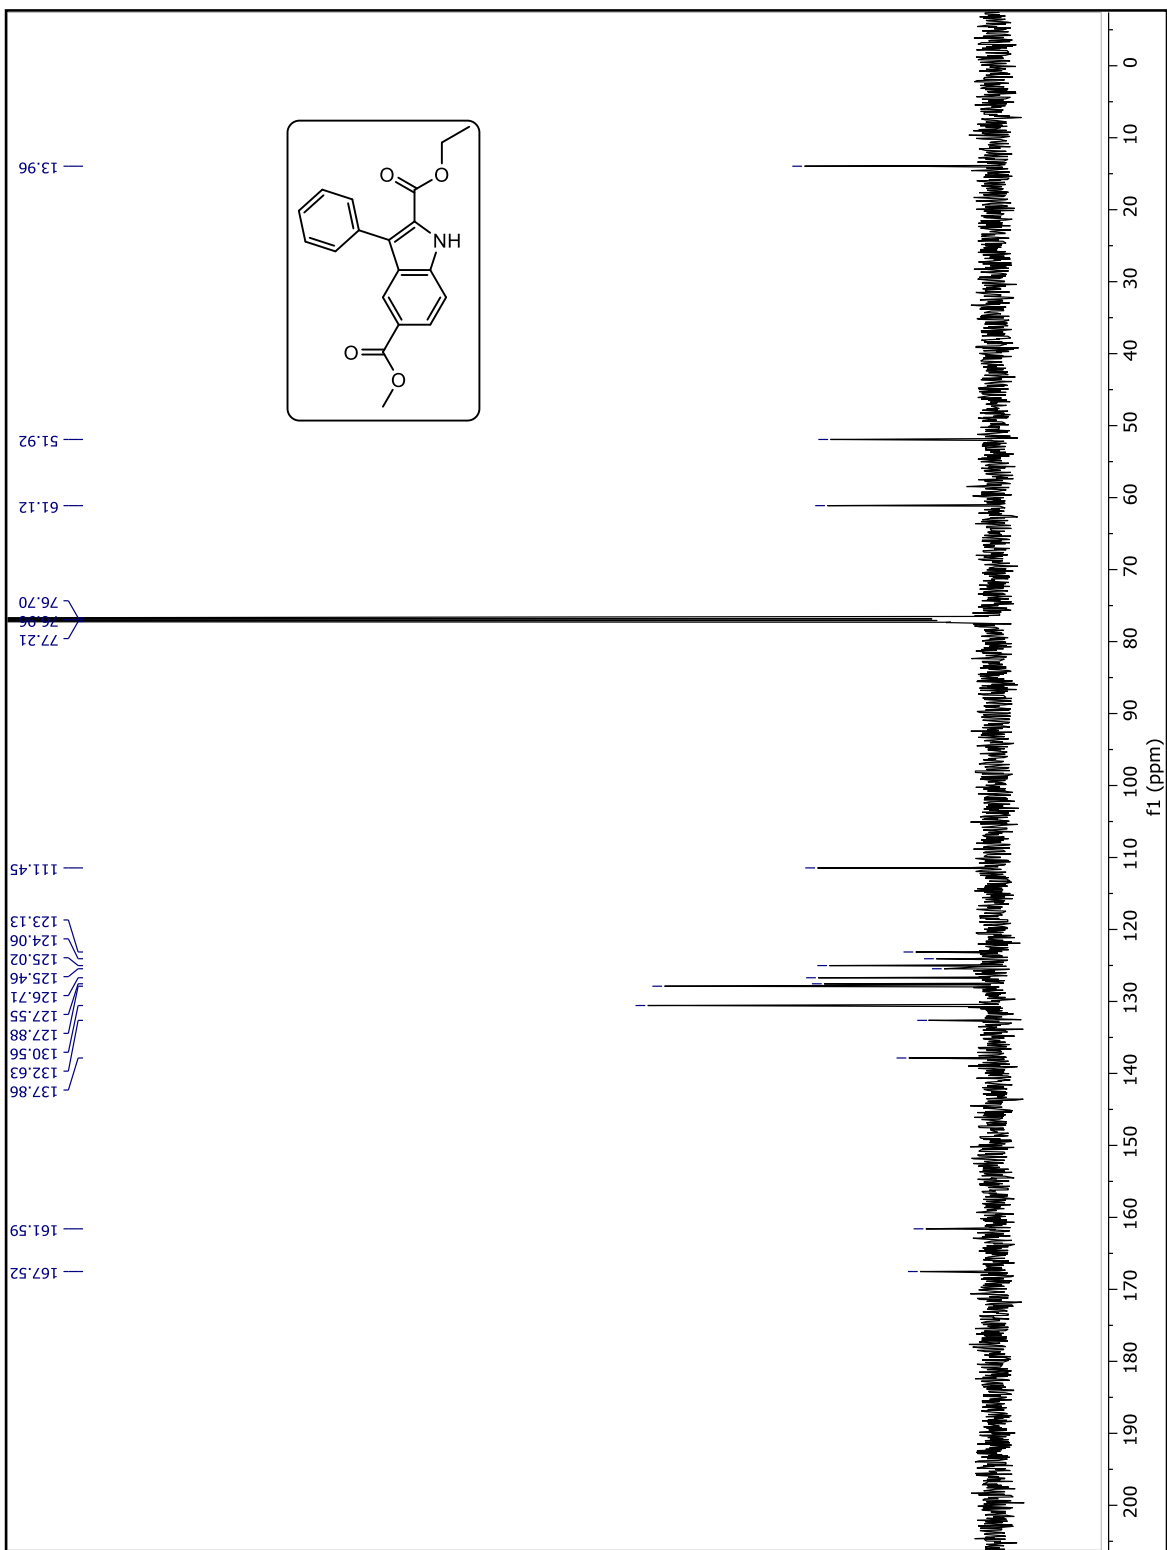

# 5-Ethyl 2-methyl 3-phenyl-1H-indole-2,5-dicarboxylate (Table 1, 3u)

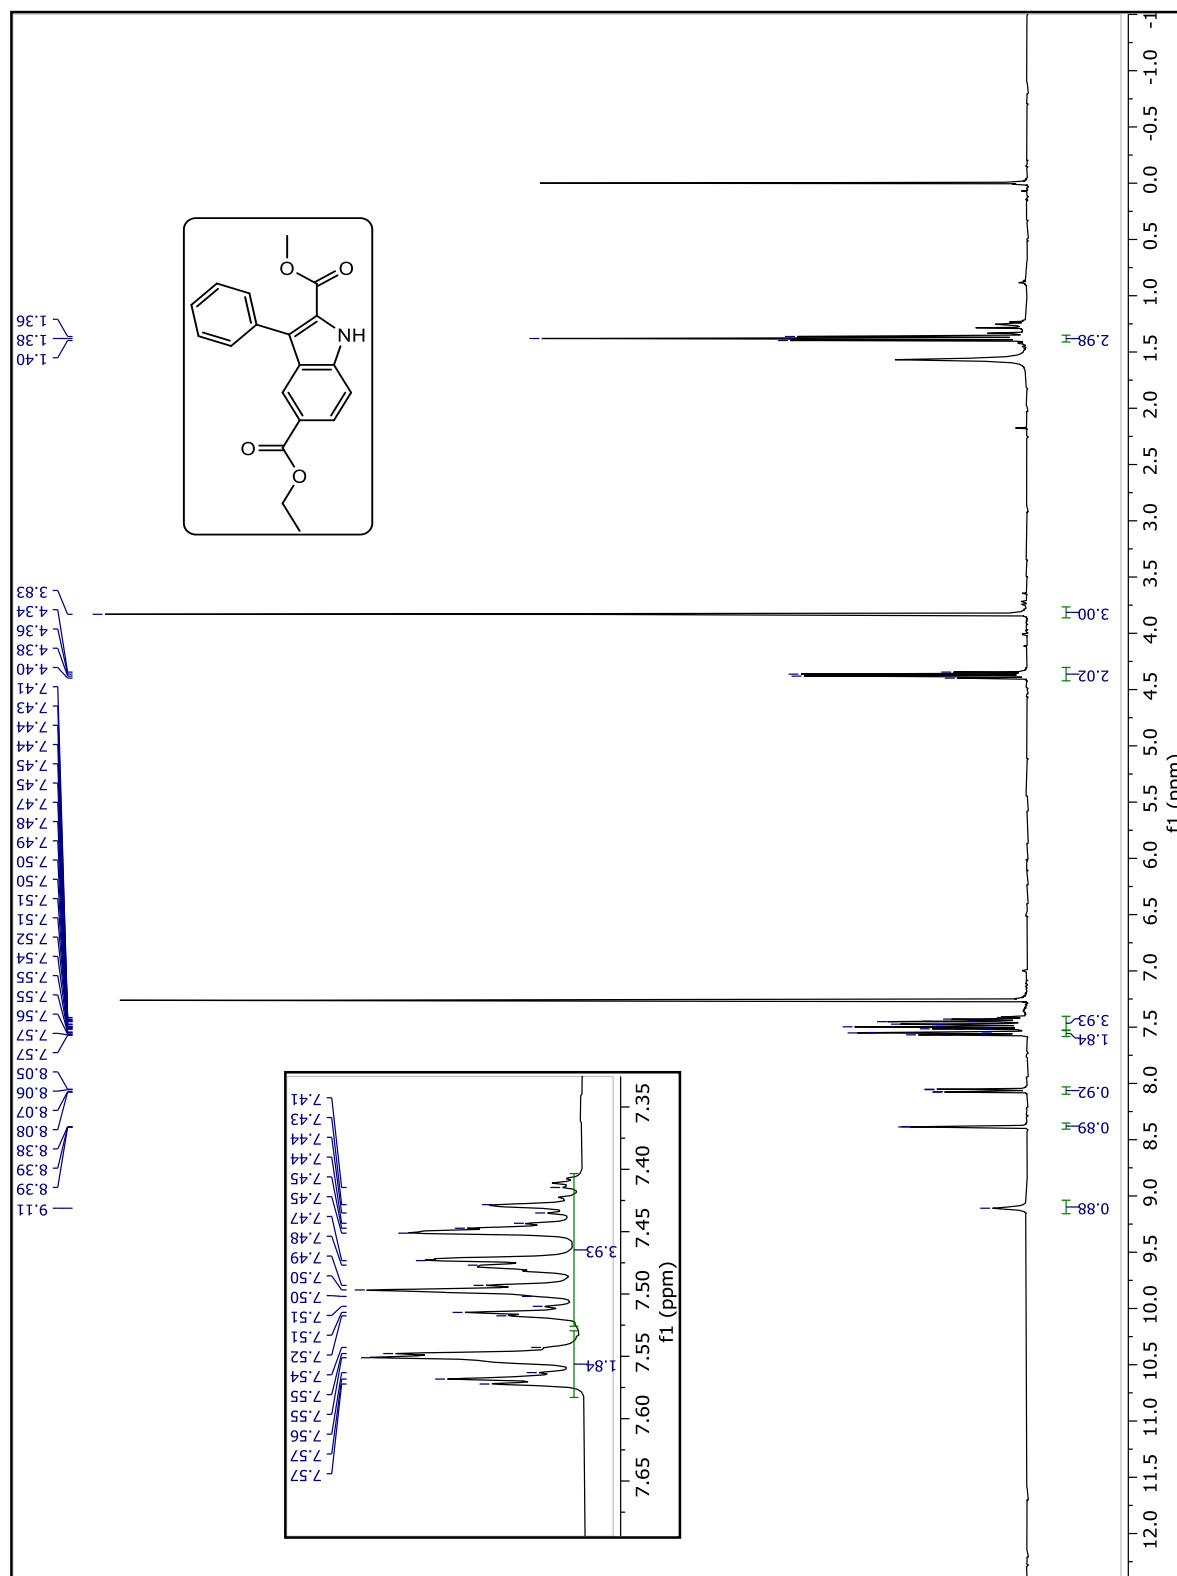

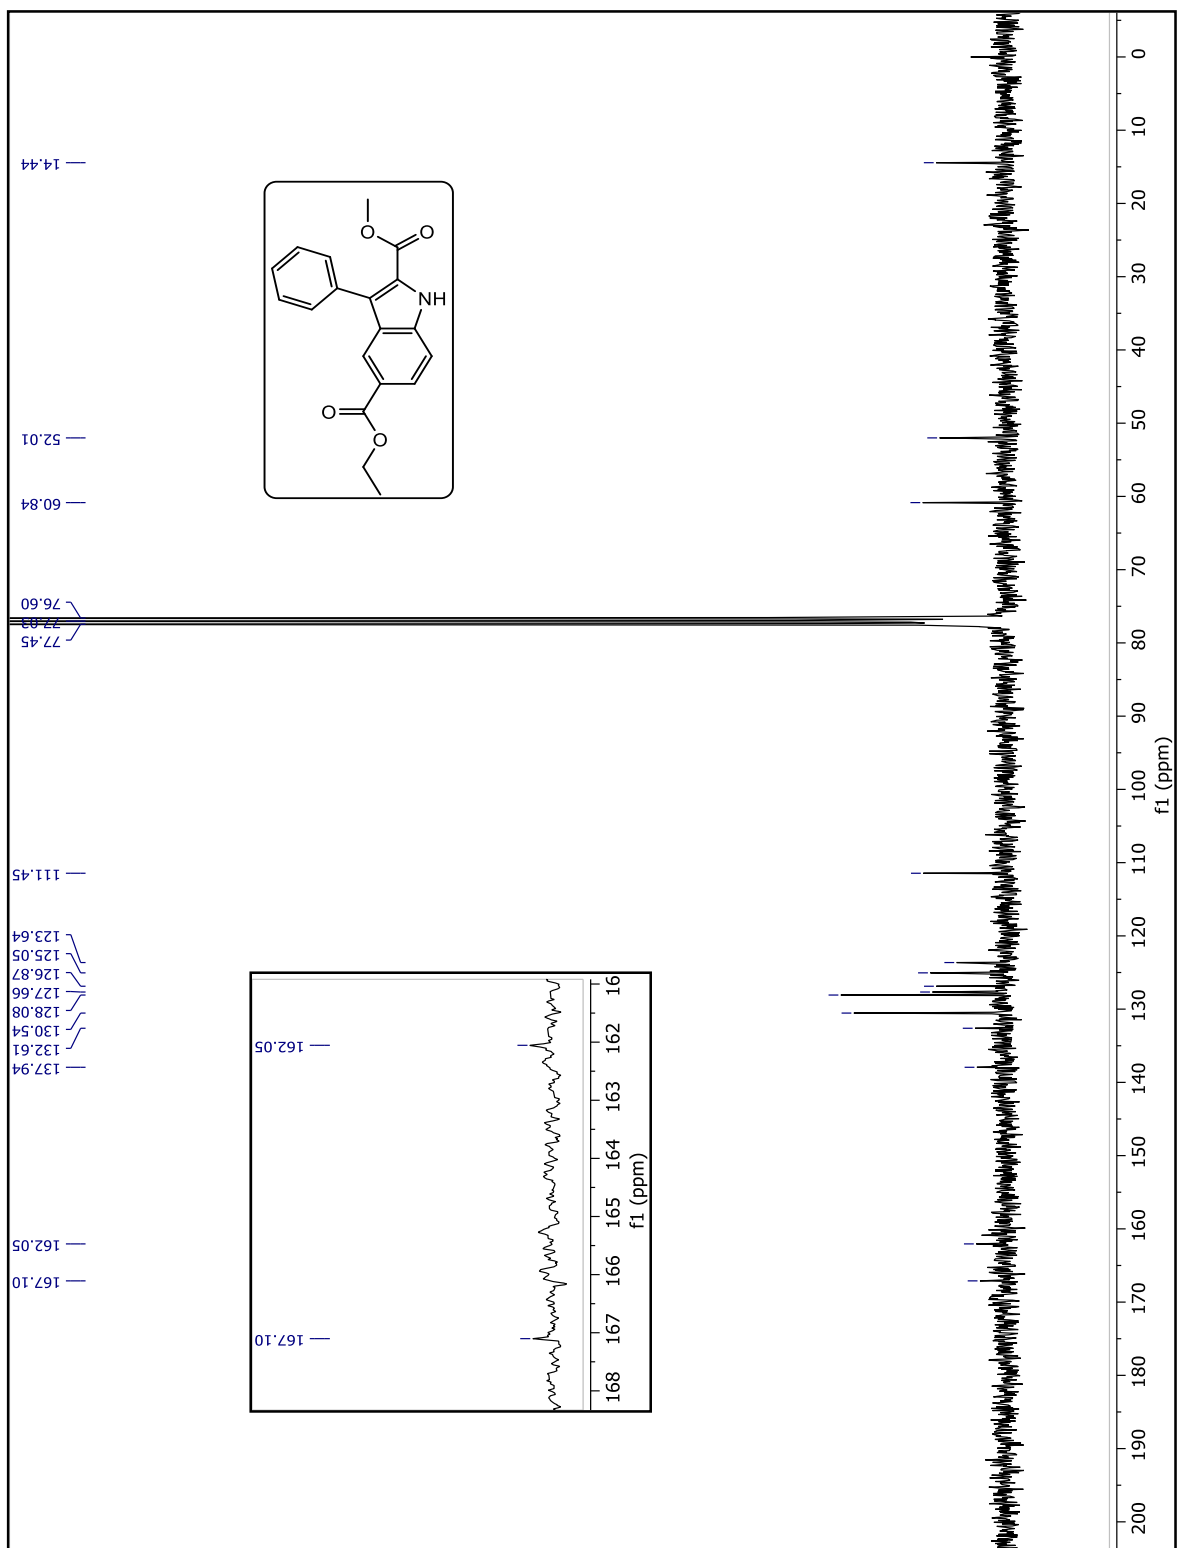

# Diethyl 3-phenyl-1H-indole-2,5-dicarboxylate (Table 1, 3v)

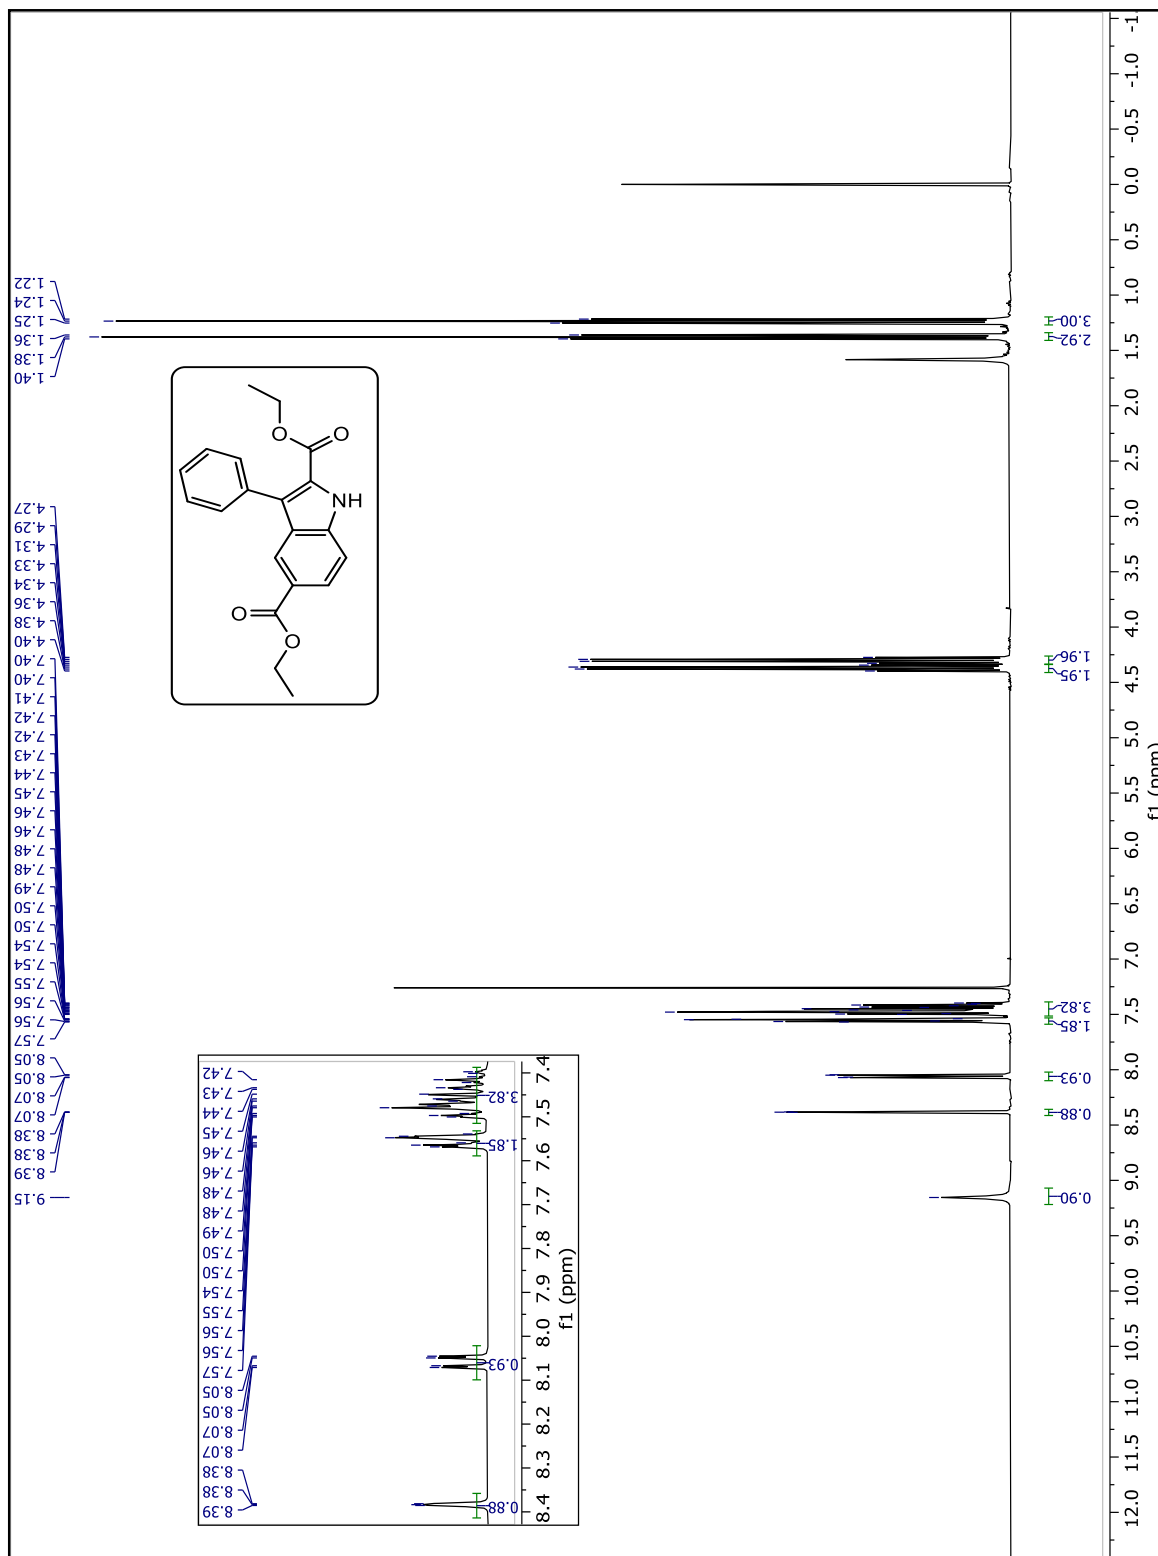

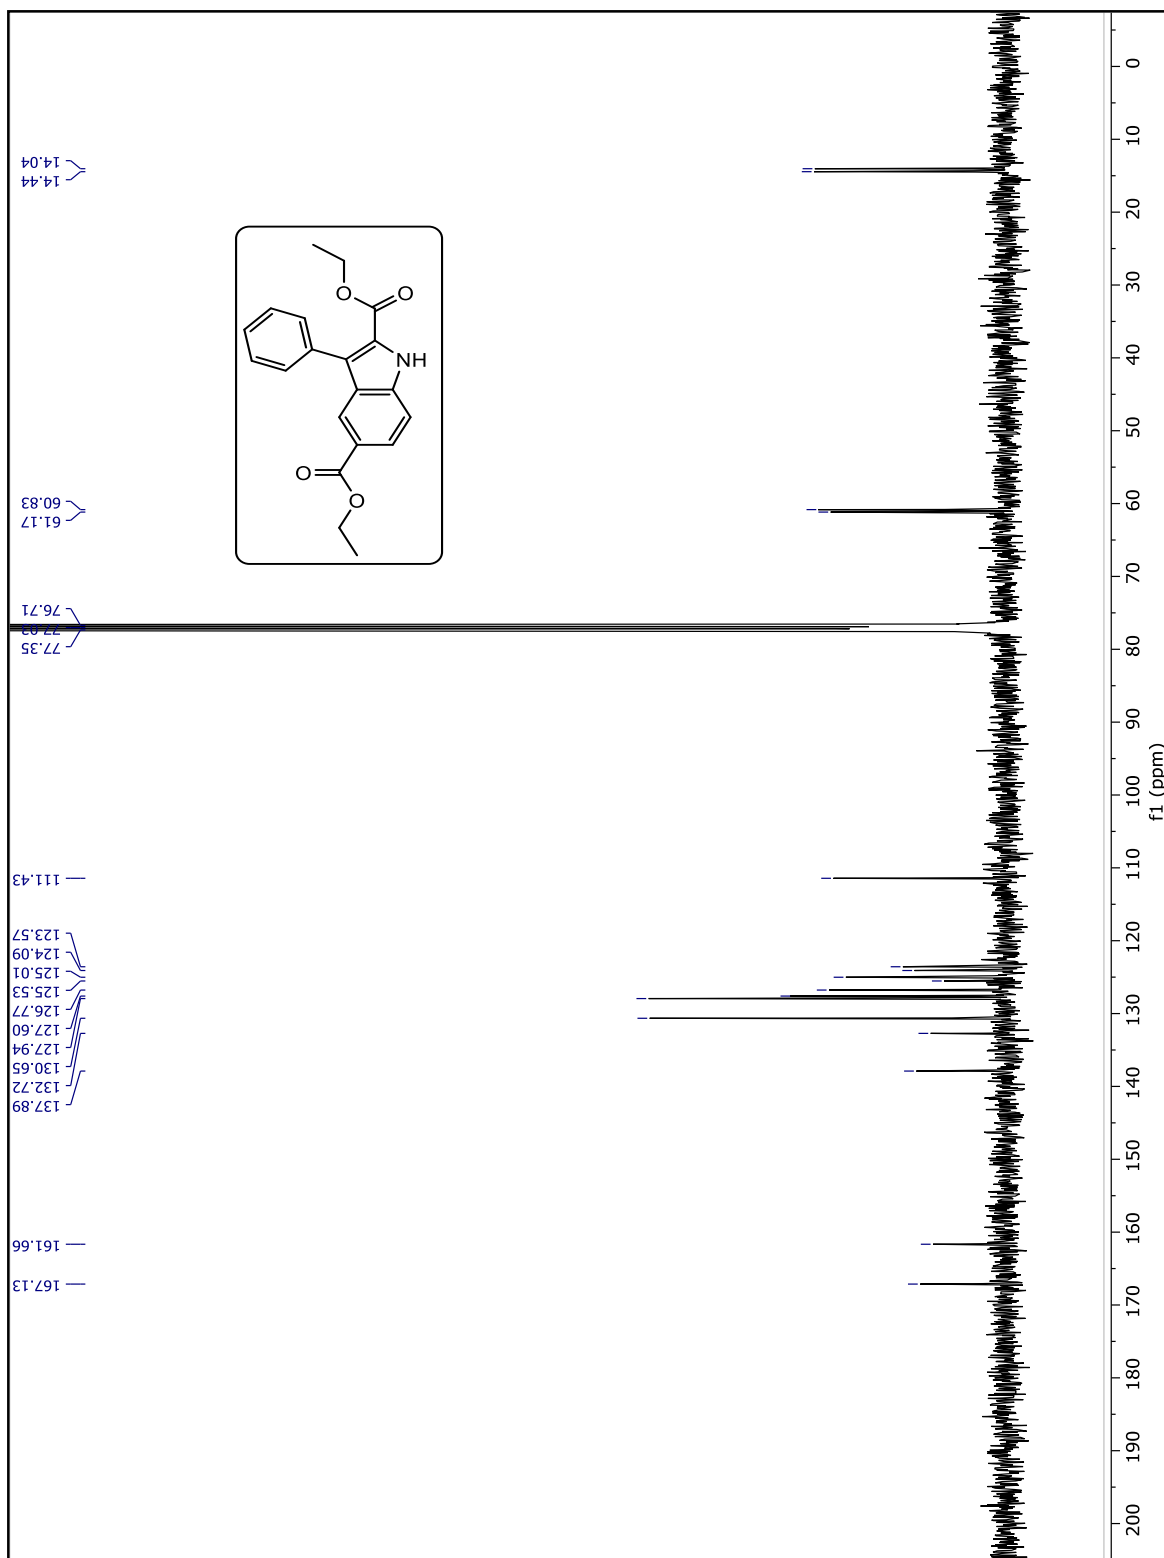

# Methyl 1H-indole-2-carboxylate (Table 1, 3y)

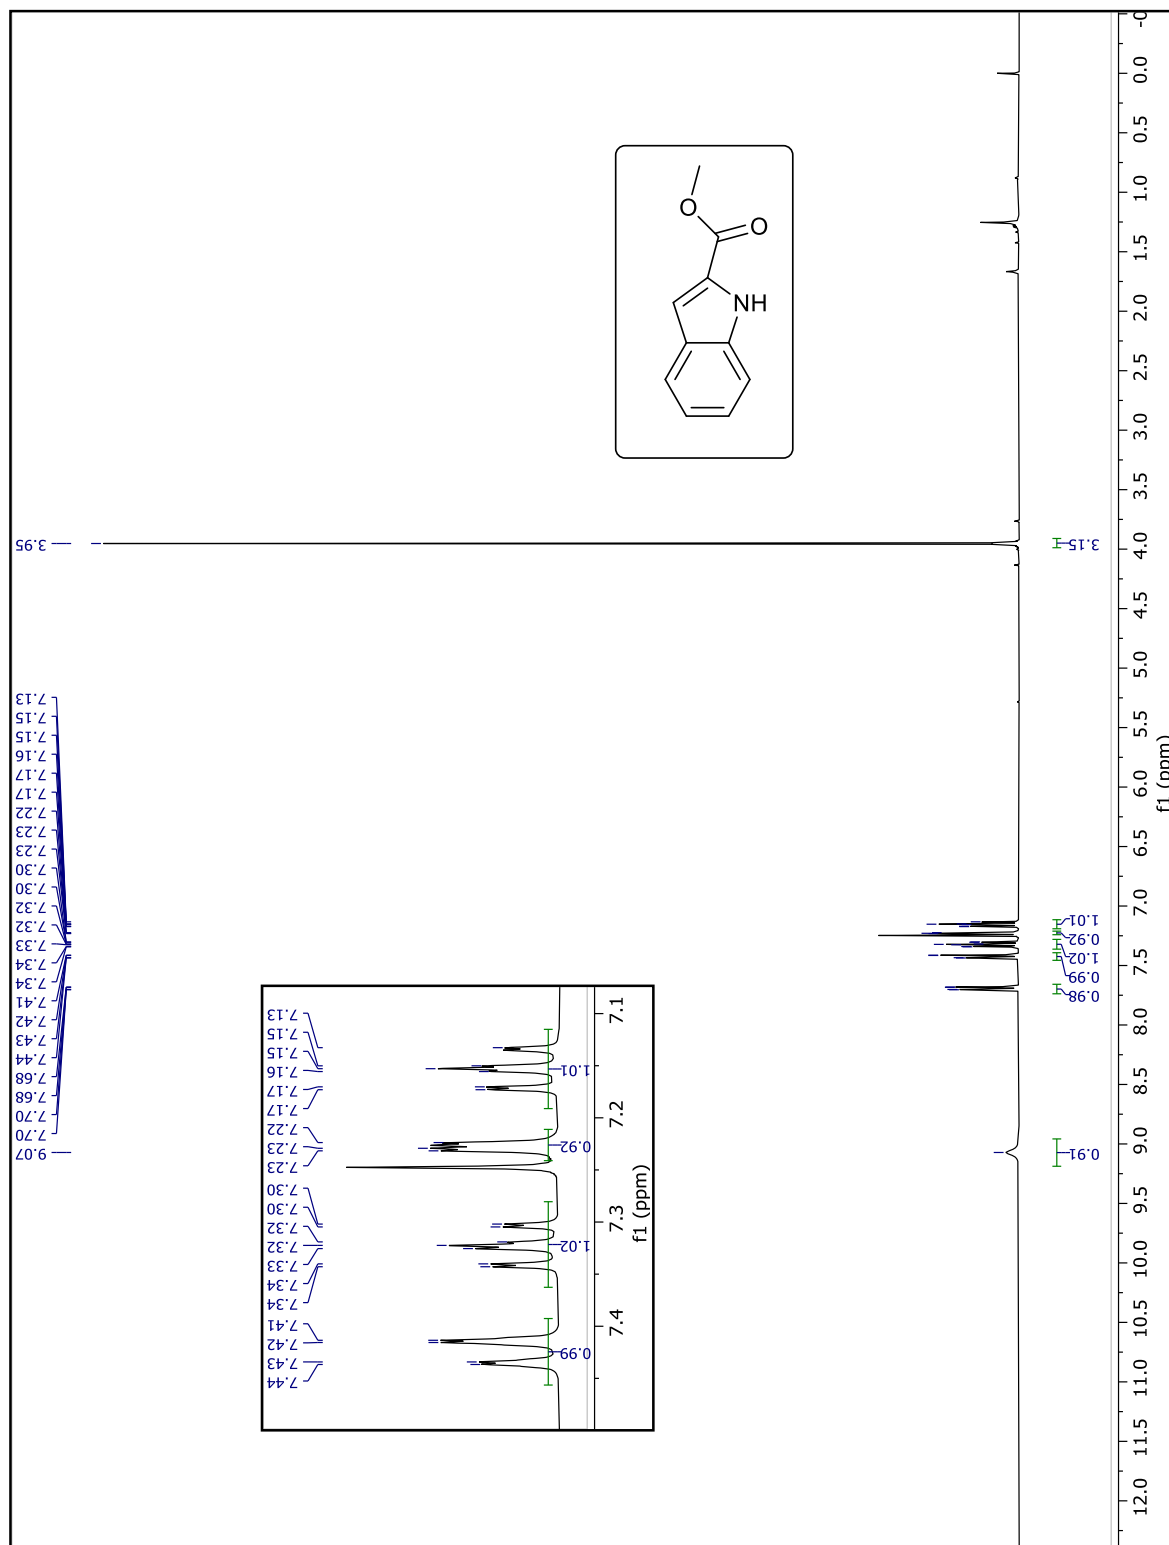

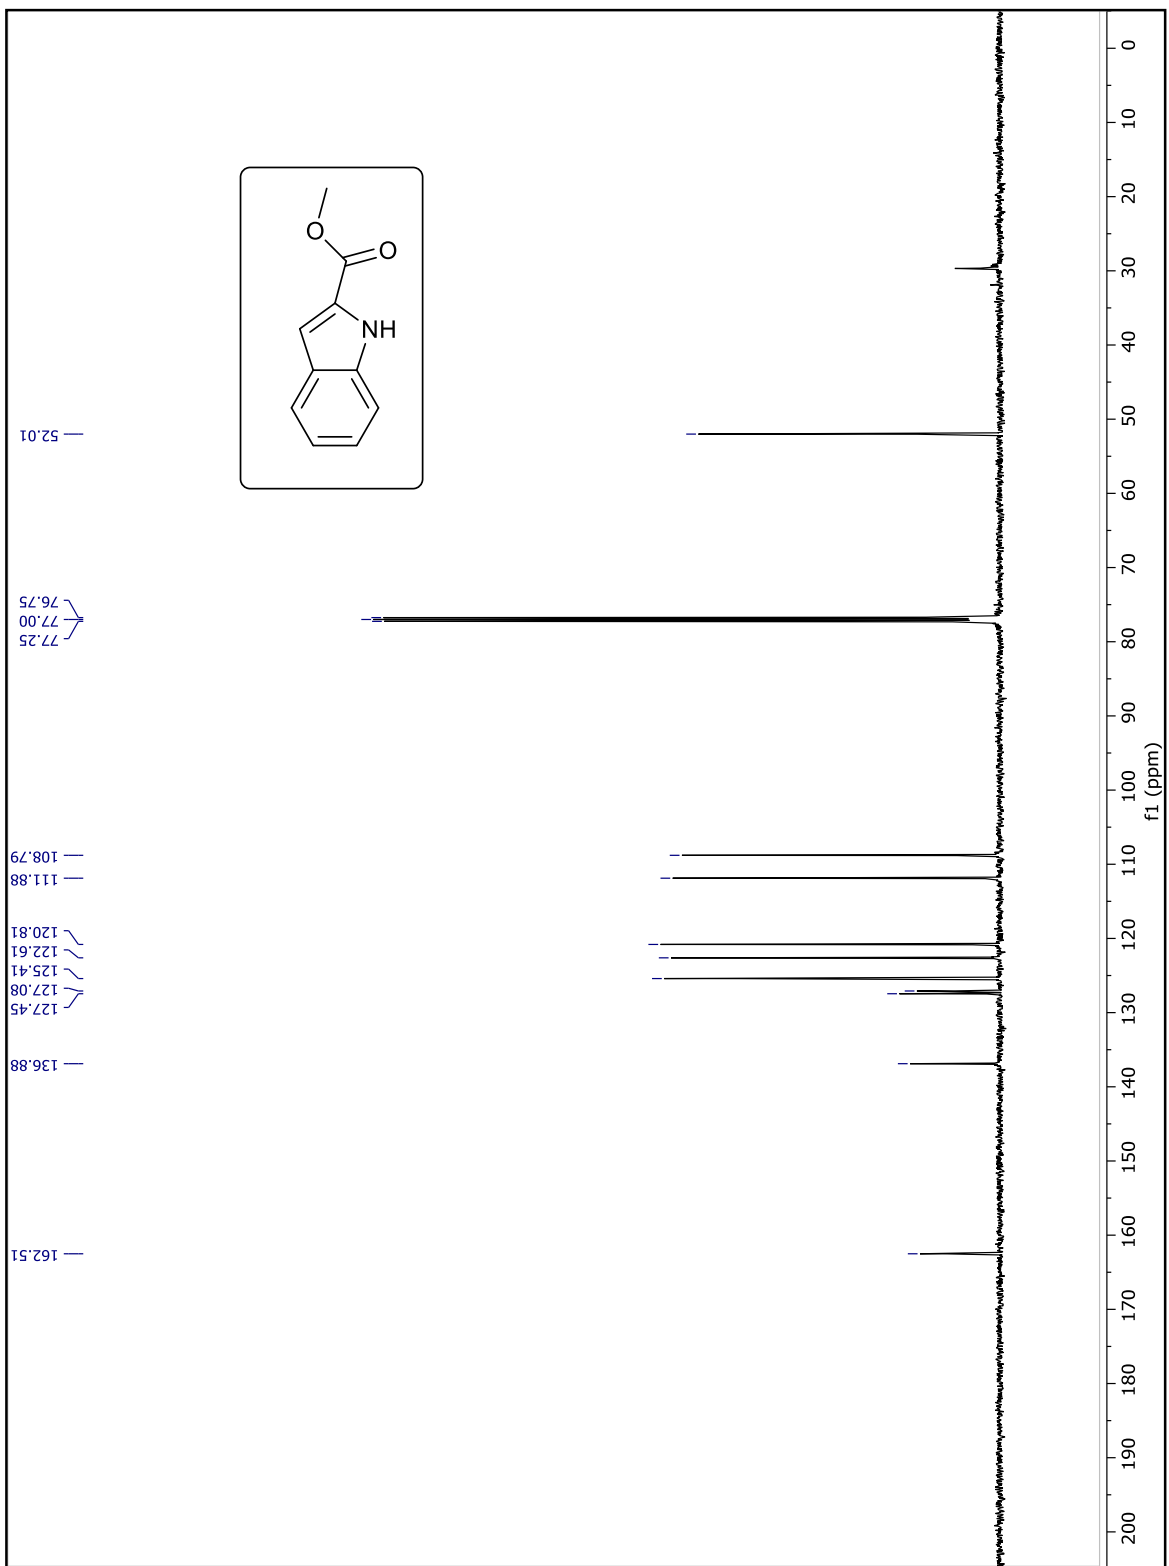

Ethyl 1H-indole-2-carboxylate (Table 1, 3z)

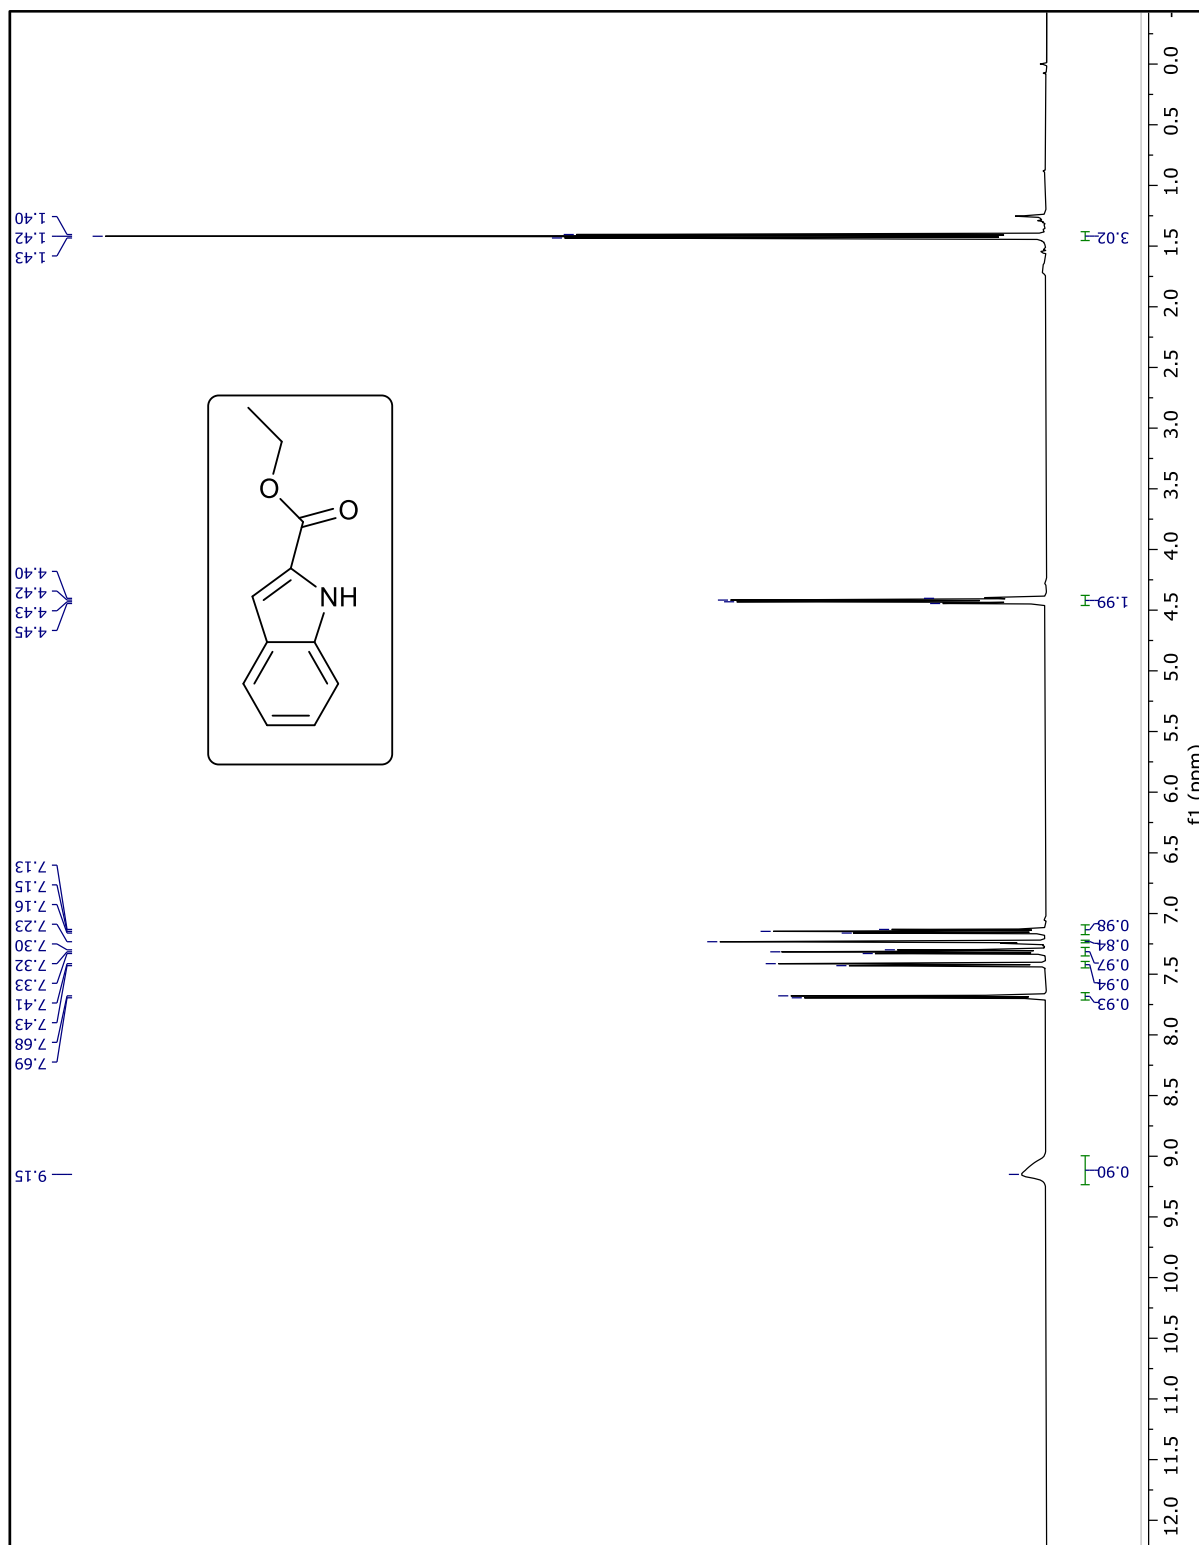

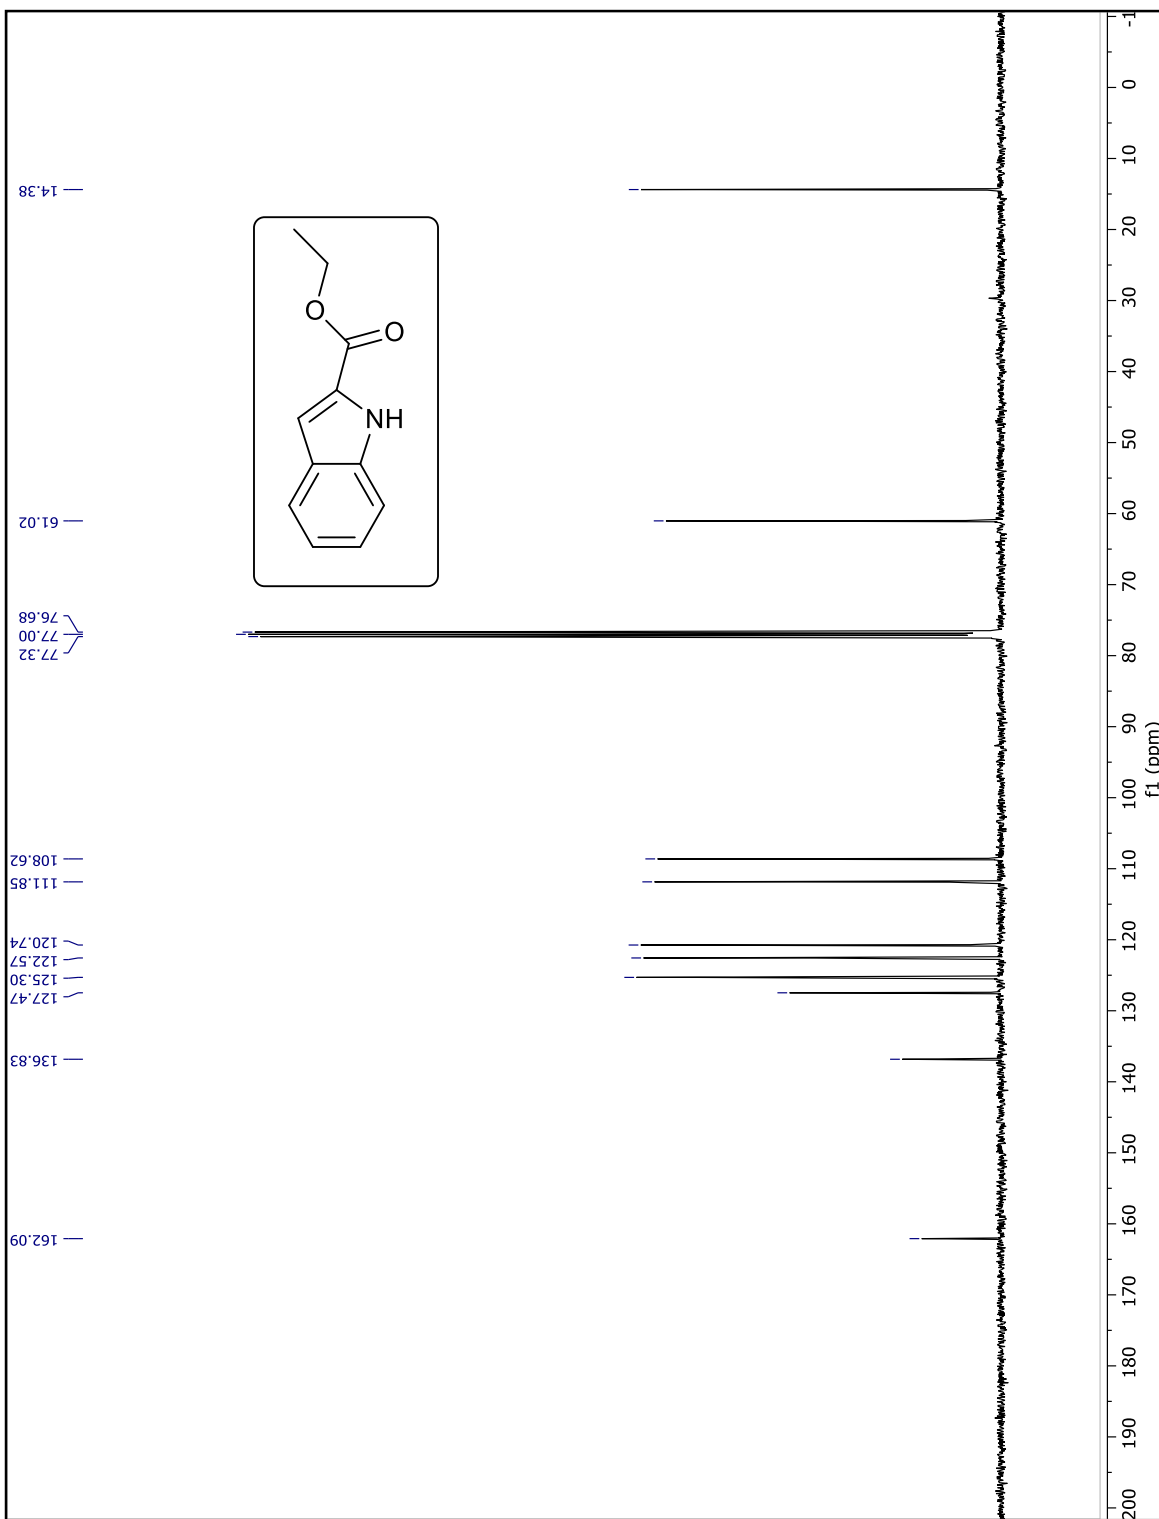



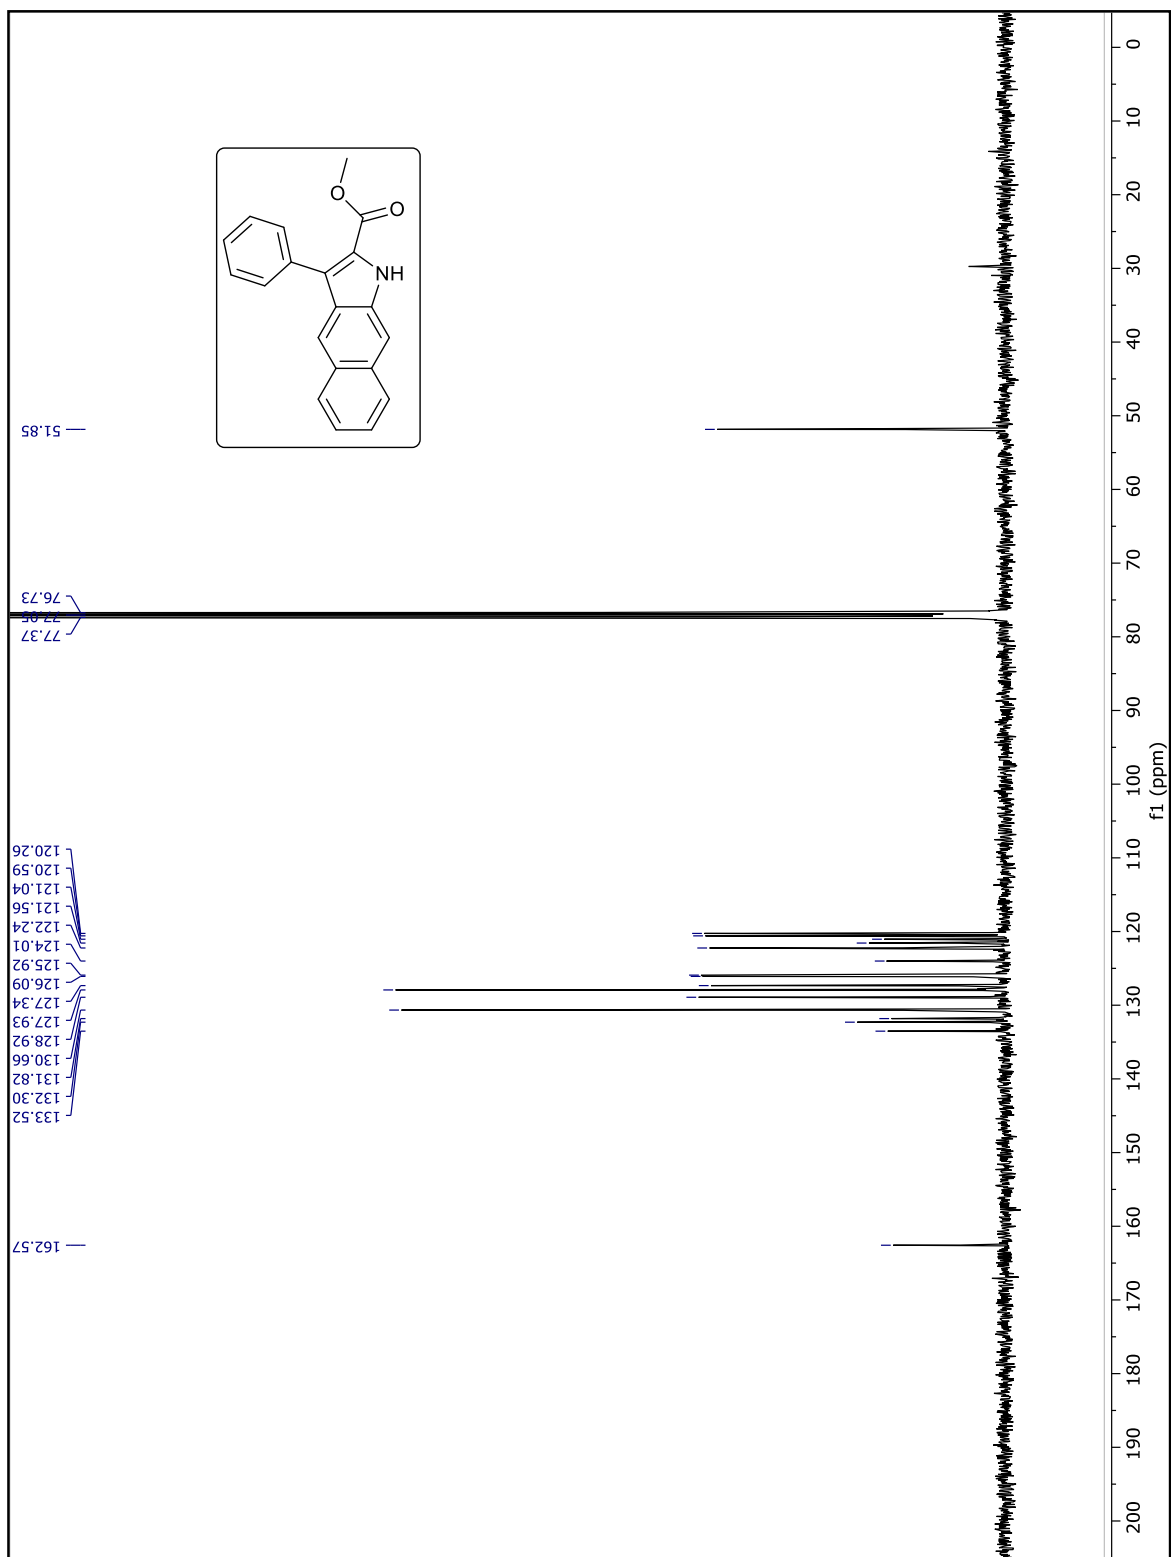

Ethyl 3-phenyl-1H-benzo[f]indole-2-carboxylate (Table 1, 3zb)

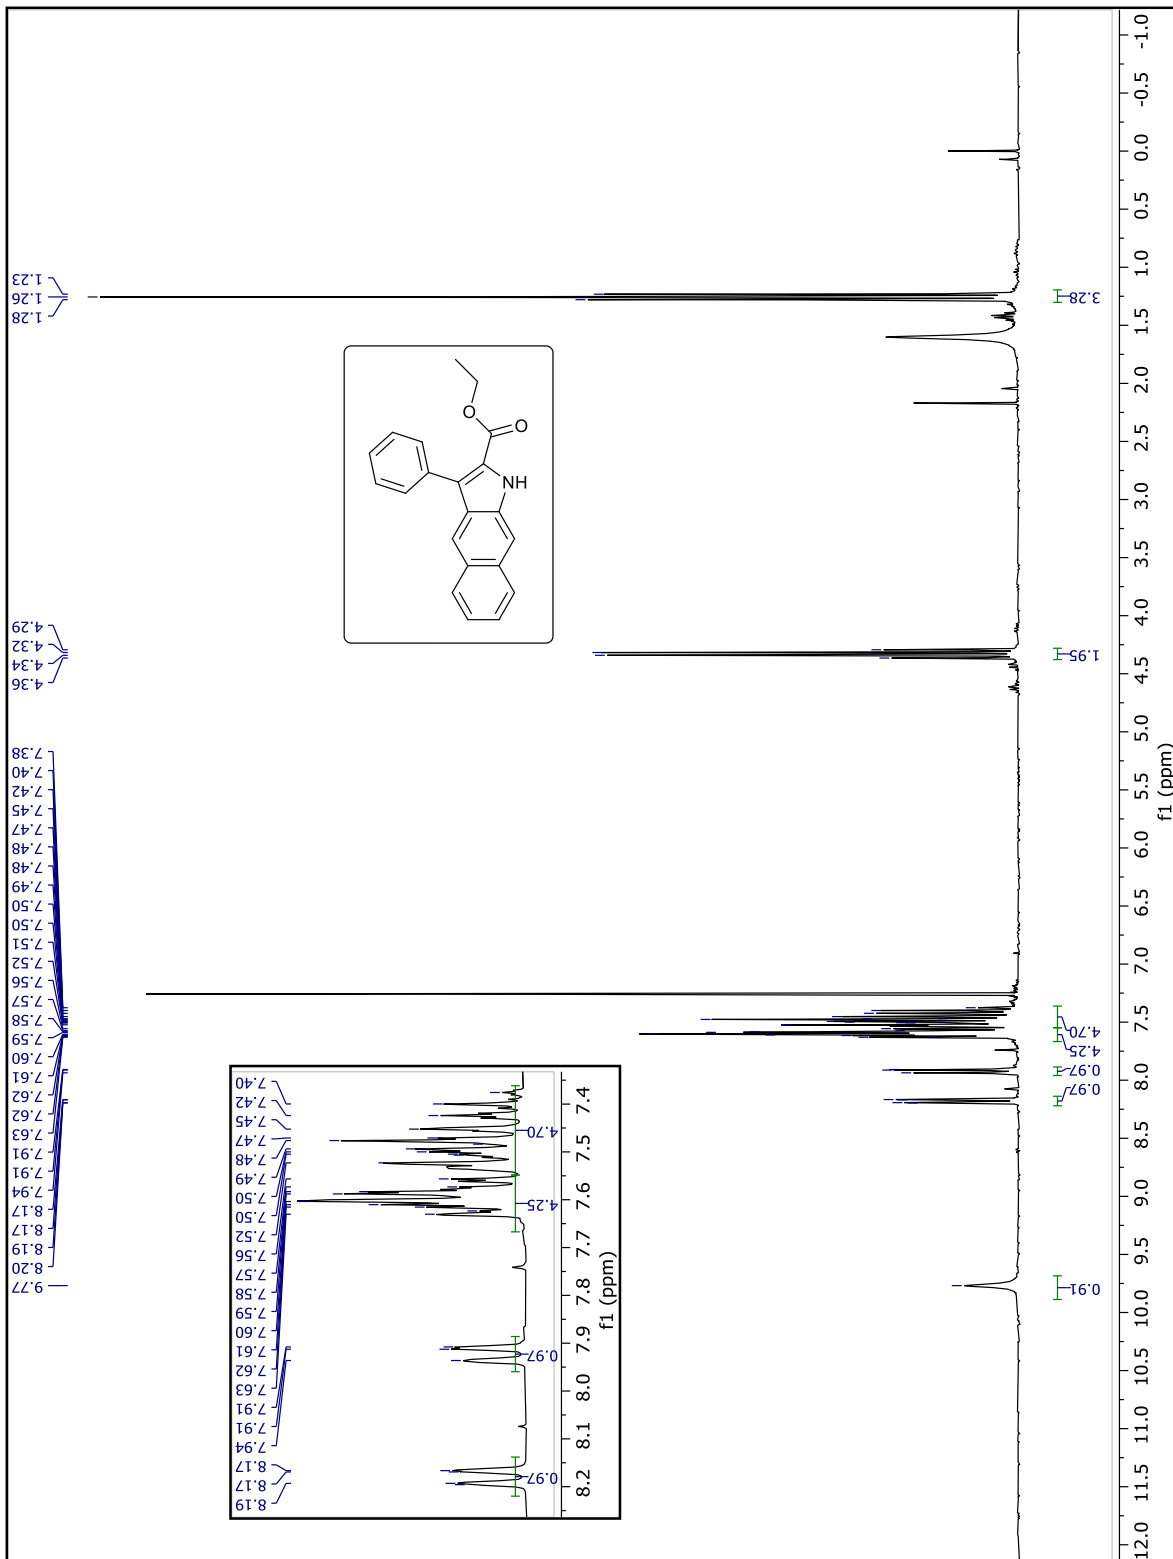

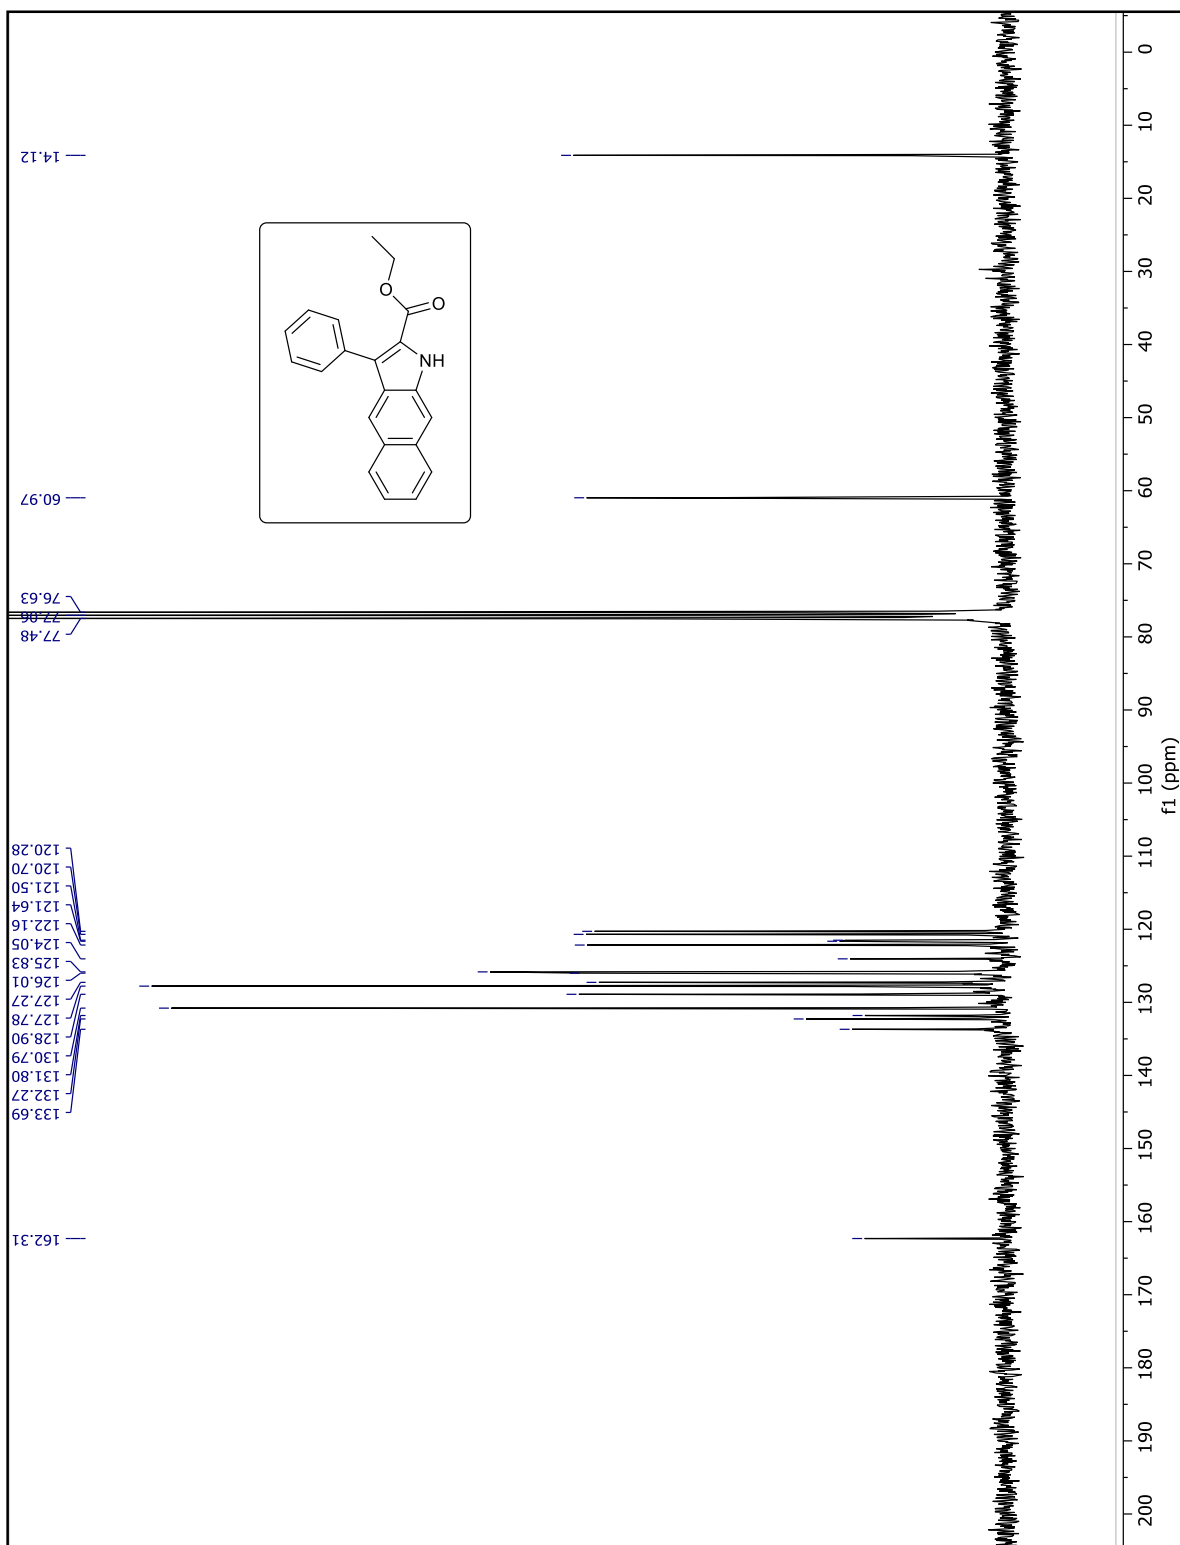

## 4. References

- [1] A. Arienti, F. Bigi, R. Maggi, E. Marzi, P. Moggi, M. Rastelli, G. Sartori and F. Tarantola, *Tetrahedron*, 1997, **53**, 3795-3804.
- [2] A. Vasu, A. M. Radikovich, M. Naresh, G. K. Sai, N. G. Grigor'eva, K. B. Ivanovich, A. Venugopal and N. Narender, *Catal. Commun.*, 2020, **135**, 105888.
- [3] Z. L. Wang, Y. H. Zhang, J. Y. Huang, J. Zhou, Y. Q. Yu, D. Feng and D. Z. Xu, *Green Chem.*, 2023, **25**, 4463-4468.
- [4] J. Ni, Y. Jiang, Z. An and R. Yan, *Org. Lett.*, 2018, **20**, 1534-1537.
- [5] K. G. Liu, A. J. Robichaud, J. R. Lo, J. F. Mattes and Y. Cai, *Org. Lett.*, 2006, **8**, 5769-5771.
- [6] E. Yasui, M. Wada and N. Takamura, *Tetrahedron*, 2009, **65**, 461-468.
- [7] J. Ni, Y. Jiang, Z. An and R. Yan, *Org. Lett.*, 2018, **20**, 1534-1537.
- [8] D. Hong, Z. Chen, X. Lin and Y. Wang, *Org. Lett.*, 2010, **12**, 4608-4611.
- [9] D. V. Patil, R. Patel, S. Takizawa, H. Y. Kim and K. Oh, *Adv. Synth. Catal.*, 2025, **367**, e202401333.
- [10] J. Noh, J. Y. Cho, M. Park and B. Y. Park, *J. Org. Chem.*, 2023, **88**, 10682-10692.
